# Supplementary material for: Influence of surface coating on the intracellular behaviour of gold nanoparticles: a fluorescence correlation spectroscopy study
Source: Royal Society of Chemistry journal article supplement (doi:10.1039/c7nr04640e), 2017-01-01
Supplement: c7nr04640e1.pdf [file c7nr04640e1.pdf]

## **Influence of Surface Coating on the Intracellular Behaviour of Gold Nanoparticles: A Fluorescence Correlation Spectroscopy Study**

A. Silvestri<sup>1,2‡</sup>, D. Di Silvio<sup>3 ‡</sup>, I. Llarena<sup>3</sup>, R. A. Murray<sup>3</sup>, M. Marelli<sup>1</sup>, L. Lay<sup>2, 4</sup>, L. Polito<sup>1,\*</sup>, and S. E. Moya<sup>3,\*</sup>

‡ These authors contributed equally to the article.

1. CNR – ISTM, Nanotechnology Lab., Via G. Fantoli 16/15, 20138, Milan, Italy
2. Department of Chemistry, University of Milan, Via C. Golgi 19, 20133, Milan, Italy
3. CRC Materiali Polimerici (LaMPo), University of Milan, Via C. Golgi 19, 20133, Milan, Italy
4. Soft Matter Nanotechnology Group, CIC biomaGUNE, Paseo Miramon, 182, 20014, San Sebastian, Spain

### **Supporting material**

#### **Table of contents**

- S1. Materials and methods
- S2. Synthesis of N-4-thiobutyroil glucosamine
- S3. Synthesis of alkyl-PEG<sub>600</sub> derivative
- S4. Au NPs synthesis
- S5. Au NPs characterization
- S6. Labelling of the Au NPs with ATTO550 NHS ester
- S7. Characterization of fluorescent labelled Au NPs
- S8. Au NP hydrodynamic diameter in water
- S9. Au NP hydrodynamic diameter in full RPMI
- S10. Fluorescence correlation spectroscopy (FCS) measurements in living cells
- S11. Confocal imaging
- S12. FCS: Fitting examples
- S13. Bibliography

## S1. Materials and methods

HAuCl<sub>4</sub>·3H<sub>2</sub>O, AgNO<sub>3</sub>, hydroquinone, 4,4'-dithiodibutyric acid, glucosamine hydrochloride, butylamine, 1-Ethyl-3-(3-dimethylaminopropyl)carbodiimide (EDC), N,N'-Dicyclohexylcarbodiimide (DCC), N-Hydroxysuccinimide (NHS), 1,4-Dithiothreitol (DTT) and NaOH were purchased from Sigma-Aldrich, and used without further purification. HAuCl<sub>4</sub>·3H<sub>2</sub>O was stored at 4 °C, shielded from light, as 10 mM solution and NaOH was stored as 1 M water solution. AgNO<sub>3</sub> 10 mM and hydroquinone solutions were freshly prepared before every synthesis (avoiding the exposition to the light). HS-PEG<sub>5000</sub>-OCH<sub>3</sub> and HS-PEG<sub>5000</sub>-NH<sub>2</sub>, purchased from Rapp Polymer GmbH, were used as received and stored under dry argon atmosphere at -20 °C. HS-Alkyl-PEG<sub>600</sub>-COOH ([1-mercaptoundec-11-yl]PEG<sub>600</sub>)-acetic acid) was synthesized by Choris srl. (Varese, Italy) following a literature reported procedure<sup>1</sup> UV-vis spectroscopy (Spectrophotometer Bio UV-Vis V630 Jasco) was performed using a disposable cuvette with 1 cm optical path length. The experiments were performed in triplicate at 25 °C. MilliQ water was employed as baseline. Dynamic Light Scattering (DLS) measurements were performed employing a Malvern Zetasizer Nano ZS90. Specimens were filtered with a cellulose acetate syringe filter (0.22 μm) before to load the cuvette. Each sample was equilibrated for 2 min prior to measure. At least three independent measurements of 10 runs (10 s each one) were performed for each sample. A reduced volume plastic cuvette was employed for DLS experiments loaded with 450 μl of sample. A capillary zeta cell was used for ζ-potential measurements loaded with 1 ml of sample. Fluorescence spectra were registered employing Fluorometer Fluorolog-TCSPC (Horiba-Jovin Ivon). The sample was excited at 564 nm with a 2 nm slit and averaged over 5 accumulations, to enhance the signal to noise ratio. The fluorescence signal was acquired starting at 570 nm. A disposable cuvette with 1 cm optical path length was used for the measurements. FCS data were recorded on an LSM 510 inverted microscope outfitted with the Confocor 3 FCS module (Carl Zeiss GmbH). Acquisition and analysis of LSM image and Confocor is controlled by the Zen software. The DPSS laser at 561 nm has been employed as excitation source. The microscope objective used was a 40X water immersion objective, 1Airy Unit. Autocorrelation functions G(τ) were analyzed by Quickfit 3.0 software (DKFZ, Germany) employing in the order Simulated Annealing with box constraints and Levenberg-Marquardt Algorithm with box constraints. All the fitting were performed using a three-dimensional normal diffusion model. One or two components were used in the fitting model verifying the statistical improvement.

## S2. Synthesis of N-4-thiobutyroil glucosamine

### Synthesis 4,4'-Dithiodibutyroil NHS ester

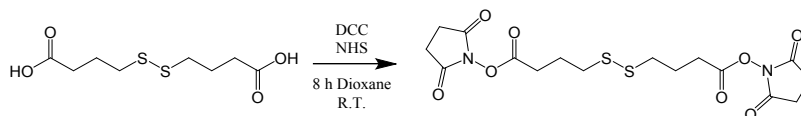

The reaction was performed under dry conditions and Argon atmosphere. Dioxane was filtered on an alumina column to remove the peroxides and degassed under vacuum. 4,4'-Dithiodibutyric acid (DTBA, 400 mg, 1.67 mmol, 1 eq) and NHS (422 mg, 3.67 mmol, 2.2 eq) were dissolved in 12 ml of dioxane. 4 ml of a DCC (756 mg, 3.67 mmol, 2.2, eq) solution in dioxane were slowly dropped in the reaction mixture and left, under vigorous stirring, at room temperature for 8 hours. The solvent was evaporated at reduced pressure and the obtained product dissolved in Et<sub>2</sub>O-Acetone (1:1) solution. The mixture was filtrated to remove the white insoluble solid and the 4,4'-Dithiodibutyroil NHS ester was recovered evaporating the solvent at reduced pressure. The product was directly used for the next step without any further purification.

### Synthesis of 4,4'-Dithiodibutyroil glucosamine

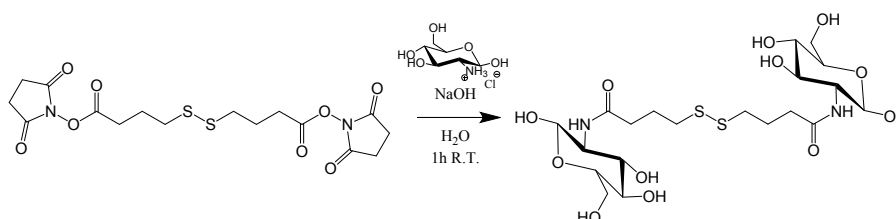

Glucosamine hydrochloride (825 mg, 3.84 mmol, 2.3 eq) was dissolved in 4 ml NaOH 1M. 22 ml MES (0.1M) buffer were added to the solution. 4,4'-Dithiodibutyroil NHS ester (691 mg, 1.59 mmol, 1 eq) was dissolved into 42 ml anhydrous DMF and added to the glucosamine solution. After 1 h reaction the solvent was evaporated at reduced pressure. The crude was suspended in 2 ml of water, and the white insoluble solid removed by filtration. The product was purified by mean of size exclusion chromatography.

Yield = 63%

m/z= 560,17

<sup>1</sup>H NMR (400 MHz, D<sub>2</sub>O) δ= 8.41 (s, 2H, NH), 5.16 (d, *J* = 3.5 Hz, 1H, H-1α), 4.67 (d, *J* = 8.4 Hz, 1H, H-1β), 3.90 – 3.60 (m, 8H, H-2, H-3, H-5, H-6), 3.41 (m, 2H, H-4), 2.71 (t, 4H, CH-S), 2.39 (m, 4H, CH-CO), 1.97 (m, 4H, CH<sub>2</sub>-CH-CH<sub>2</sub>).

<sup>13</sup>C NMR (101 MHz, D<sub>2</sub>O) δ= 171.52 (C=O), 95.70-90.91 (C-1), 71.60 (H-2), 70.87 (H-5), 70.21 (H-6), 60.81 (H-4), 37.25 (H<sub>2</sub>C-S), 34.35 – 34.16 (H<sub>2</sub>C-C=O), 24.67 (CH<sub>2</sub>-CH<sub>2</sub>-CH<sub>2</sub>).

### Synthesis of N-4-thiobutyroil glucosamine

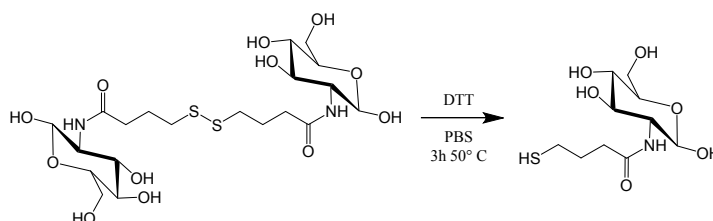

4,4'-Dithiodibutyroil glucosamine (40 mg, 0.07 mmol, 1 eq) was dissolved into 10 ml of PBS solution at pH 7.4. DTT (54 mg, 0.35 mmol, 5 eq) was added and the reaction mixture left under stirring at 50 °C for 3 hours, under argon atmosphere. The water was removed at reduced pressure and DTT removed from the crude by several washes with Et<sub>2</sub>O. The obtained white solid was directly used for the coating of the Au NPs

### S3. Synthesis of ([1-mercaptoundec-11-yl]PEG<sub>600</sub>)-acetic acid butanamide

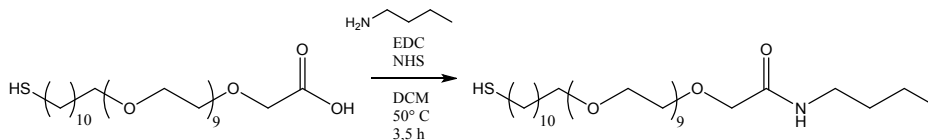

The reaction was performed in dry conditions under argon atmosphere. HS-Alkyl-PEG<sub>600</sub>-COOH (125 mg, 0.15 mmol, 1 eq) was dissolved in DCM dry. EDC (71,3 mg, 0.3 mmol, 2 eq) was added, followed, five minutes later, by NHS (43.1 mg, 0.3 mmol, 2eq). The reaction was stirred at ROOM TEMPERATURE for 30 min, then butylamine (92.5 mg, 0,75 mmol, 5 eq) were added. The reaction mixture was stirred for 3 hours at 50 °C. The solvent was evaporated at reduced pressure and the product purified by flash chromatography (DCM:MeOH=95:5).

Yield = 78 %

m/z=780.53

<sup>1</sup>H NMR (400 MHz, CDCl<sub>3</sub>) δ = 7.29 (s, 1H, NH), 4.08 (s, 2H, H<sub>2</sub>C-C=O), 3.67 (s, 30H, O-CH<sub>2</sub>-CH<sub>2</sub>-O), 3.62 – 3.57 (m, 2H, O=C-CH<sub>2</sub>-O-CH<sub>2</sub>), 3.47 (t, J = 6.8 Hz, 2H, CH<sub>2</sub>-CH<sub>2</sub>-CH<sub>2</sub>-O), 3.32 (dd, J = 13.2, 6.9 Hz, 2H, CH<sub>2</sub>-NH), 2.69 (t, 2H, S-S-CH<sub>2</sub>), 2.54 (dd, J = 14.7, 7.4 Hz, 2H, S-CH<sub>2</sub>), 1.74 – 1.49 (m, 6H CH<sub>3</sub>-CH<sub>2</sub>-CH<sub>2</sub>, HS-CH<sub>2</sub>-CH<sub>2</sub>-CH<sub>2</sub>-CH<sub>2</sub>-CH<sub>2</sub>-O), 1.44 – 1.34 (m, 2H, CH<sub>3</sub>-CH<sub>2</sub>-CH<sub>2</sub>), 1.29 (s, 7H, CH<sub>2</sub>-CH<sub>2</sub>-CH<sub>2</sub>), 1.01 – 0.92 (m, 3H, CH<sub>3</sub>).

<sup>13</sup>C NMR (101 MHz, CDCl<sub>3</sub>) δ = 158,14 (C=O) 71.56 (CH<sub>2</sub>-NH), 71.04 (O=C-CH<sub>2</sub>-O), 70.59 (O-CH<sub>2</sub>-CH<sub>2</sub>-O), 70.06 (O=C-CH<sub>2</sub>-O-CH<sub>2</sub>), 38.97 (S-S-CH<sub>2</sub>), 34.05 (S-CH<sub>2</sub>-CH<sub>2</sub>), 31.50 (CH<sub>2</sub>-CH<sub>2</sub>-CH<sub>2</sub>-O), 29.50 (CH<sub>2</sub>-CH<sub>2</sub>-CH<sub>2</sub>), 28.38 (CH<sub>2</sub>-CH<sub>2</sub>-CH<sub>2</sub>-O), 26.09 (CH<sub>2</sub>-CH<sub>2</sub>-CH<sub>3</sub>), 24.65 (S-CH<sub>2</sub>), 20.08 (CH<sub>2</sub>-CH<sub>3</sub>), 13.75 (CH<sub>3</sub>).

### S4. Au NPs synthesis

#### General procedure

A water solution of HAuCl<sub>4</sub>·3H<sub>2</sub>O (7.5 ml, 10 mM), sodium citrate (9 ml, 68 mM), and AgNO<sub>3</sub> (490 μl, 5.9 mM) was prepared and mixed at room temperature for 6 minutes.<sup>2</sup> The pre-incubated mixture was then mixed with 250 ml of water at 100 °C. The mixture was stirred at 750 rpm for 1 h. Afterwards the reaction solution was left to cool to room temperature and 5 ml of glycerol was added. After 10 minutes a second mixture of HAuCl<sub>4</sub> (7.5 ml, 10 mM), sodium citrate (10 ml, 34 mM) and AgNO<sub>3</sub> (426 μl, 5.9 mM) was pre-mixed for 6 minutes and then added to the reaction solution, immediately followed by a hydroquinone solution (8 ml, 91 mM). Then, the colloidal solution was left to react for 1h, stirring at 750 rpm. The obtained Au NPs were directly functionalised without any further concentration or purification.

#### Synthesis of Au-MSA NPs

Au-MSA NPs were obtained by adding (under argon atmosphere) 22 mg of mercapto succinic acid and 8 mg of H<sub>2</sub>N-PEG<sub>5000</sub>-SH, dissolved in 5 ml of MilliQ water, to the gold colloidal solution. The ligand proportions were calculated to obtain 10% of the NPs surface covered with PEG, considering a foot print of 5 nm<sup>2</sup> for H<sub>2</sub>N-PEG<sub>5000</sub>-SH and a footprint of 0,5 nm<sup>2</sup> for mercapto succinic acid.<sup>3-5</sup> The foot print was calculated by computational modelling. The reaction mixture was allowed to stir for further 48 hours at room temperature. The functionalised Au NPs were purified and concentrated to a final volume of 10 ml

using Amicon centrifugal filter units. The purification of the system was completed using dialysis tubes with a cut-off of 10 kDa (48 hours, 6 changes of water).

### **Synthesis of Au-Glucosamine NPs**

Au-Glucosamine NPs were obtained by adding (under argon atmosphere) 25 mg of 4-thiobutyl glucosamide and 5 mg of H<sub>2</sub>N-PEG<sub>5000</sub>-SH, dissolved in 5 ml of MilliQ water, to the gold colloidal solution. The ligands proportions were calculated to obtain 10% of the NPs surface covered with H<sub>2</sub>N-PEG<sub>5000</sub>-SH, considering a footprint of 5 nm<sup>2</sup> for H<sub>2</sub>N-PEG<sub>5000</sub>-SH and a footprint of 0.5 nm<sup>2</sup> for 4-thiobutyl glucosamide.<sup>3-5</sup> The reaction mixture was allowed to stir for further 48 hours at room temperature. The functionalised Au NPs were purified and concentrated to a final volume of 10 ml using Amicon centrifugal filter units. The purification of the system was completed using dialysis tubes with a cut-off of 10 kDa (48 hours, 6 changes of water).

### **Synthesis of Au-PEG<sub>5000</sub> NPs**

Au-PEG<sub>5000</sub> NPs were obtained by adding (under argon atmosphere) 27.5 mg of H<sub>2</sub>N-PEG<sub>5000</sub>-SH and 2.5 mg of H<sub>2</sub>N-PEG<sub>5000</sub>-SH, dissolved in 5 ml of MilliQ water, to the gold colloidal solution. The ligand proportions were calculated to obtain 10% of the NPs surface covered with H<sub>2</sub>N-PEG<sub>5000</sub>-SH, considering a footprint of 5 nm<sup>2</sup> for both the PEG molecules.<sup>3-5</sup> The reaction mixture was allowed to stir for further 48 hours at room temperature. The functionalised Au NPs were purified and concentrated to a final volume of 10 ml using Amicon centrifugal filter units. The purification of the system was completed using dialysis tubes with a cut-off of 10 kDa (48 hours, 6 changes of water).

### **Synthesis of Au-Alkyl-PEG<sub>600</sub> NPs**

Au-Alkyl-PEG<sub>600</sub> NPs were obtained by adding (under argon atmosphere) 23.5 mg of HS-Alkyl-PEG<sub>600</sub>-butanamide and 6.5 mg of H<sub>2</sub>N-PEG<sub>5000</sub>-SH, dissolved in 5 ml of MilliQ water, to the gold colloidal solution. The ligands proportions were calculated to obtain 10% of the NPs surface covered with H<sub>2</sub>N-PEG<sub>5000</sub>-SH, considering a footprint of 1.5 nm<sup>2</sup> for HS-Alkyl-PEG<sub>600</sub>-butanamide and of 5 nm<sup>2</sup> for H<sub>2</sub>N-PEG<sub>5000</sub>-SH.<sup>3-5</sup> The reaction mixture was allowed to stir for further 48 hours at ROOM TEMPERATURE. The functionalised Au NPs were purified and concentrated to a final volume of 10 ml using Amicon centrifugal filter units. The purification of the system was completed using dialysis tubes with a cut-off of 10 kDa (48 hours, 6 changes of water).

## S5. Au NPs characterisation

### Au-MSA NPs

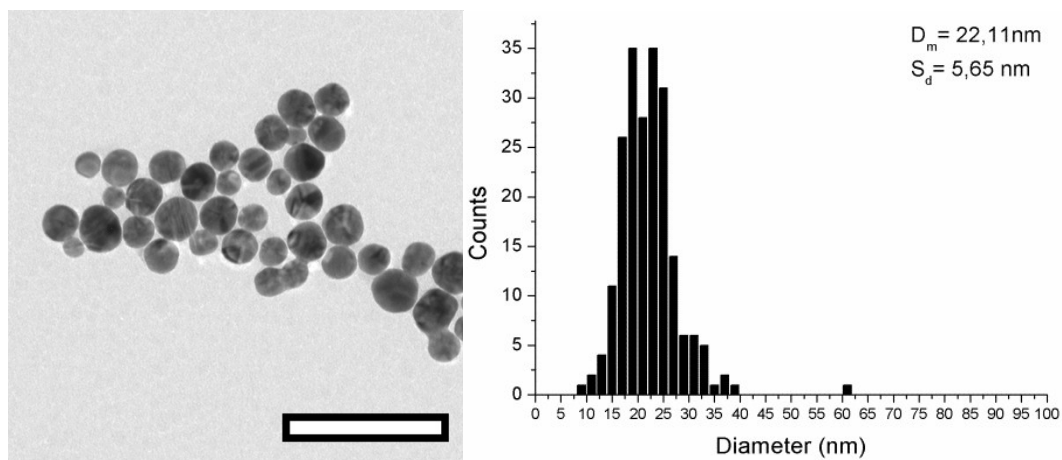

**Figure S1.** On the left: TEM micrograph of Au-MSA NPs (scale bar 100 nm). On the right: distribution of Au-MSA NP diameters evaluated by ImageJ.

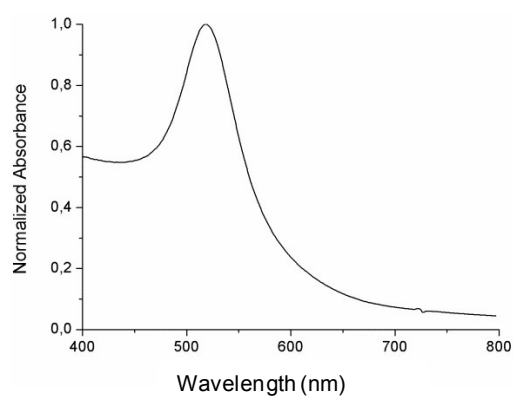

**Figure S2.** UV-visible spectrum of Au-MSA NPs

|                                     |                                              |
|-------------------------------------|----------------------------------------------|
| <b><math>\zeta</math>-potential</b> | <b><math>-24,6 \pm 10,8\text{ mV}</math></b> |
| <b>Hydrodynamic Diameter</b>        | <b><math>32,7 \pm 12,2\text{ nm}</math></b>  |

**Table S1.**  $\zeta$ -potential and hydrodynamic diameter of Au-MSA NPs obtained with dynamic light scattering technique.

### Au-Glucosamine NPs

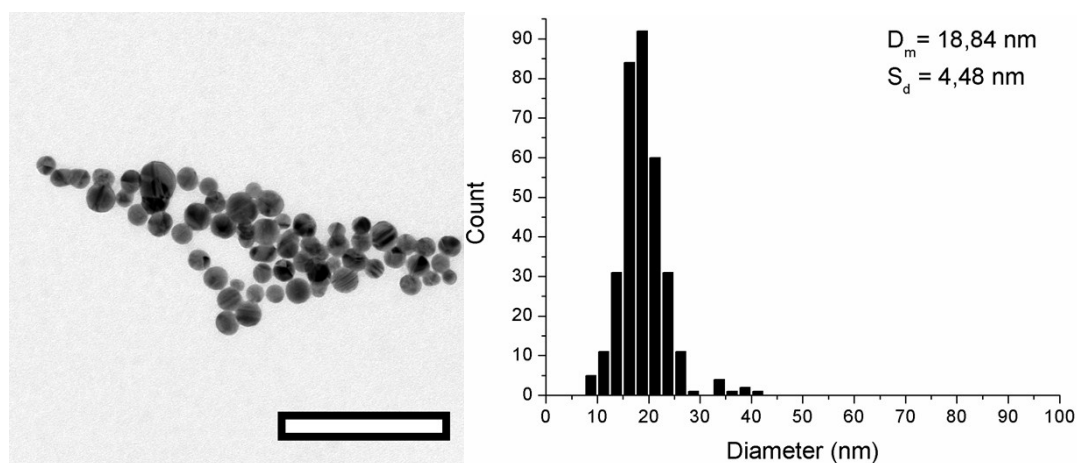

**Figure S3.** On the left: TEM micrograph of Au-Glucosamine NPs (scale bar 100 nm). On the right distribution of Au-Glucosamine NP diameters evaluated by ImageJ.

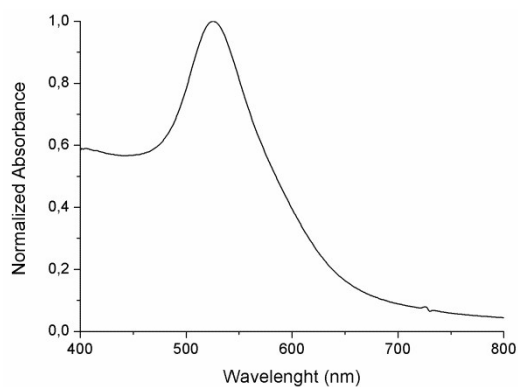

**Figure S4.** UV-visible spectrum of Au-Glucosamine NPs

|                              |                        |
|------------------------------|------------------------|
| <b>ζ-potential</b>           | <b>-21,7 ± 19,0 mV</b> |
| <b>Hydrodynamic Diameter</b> | <b>30,6 ± 14,0 nm</b>  |

**Table S2.** ζ-potential and hydrodynamic diameter of Au-Glucosamine NPs from DLS measurements

### Au-PEG<sub>5000</sub> NPs

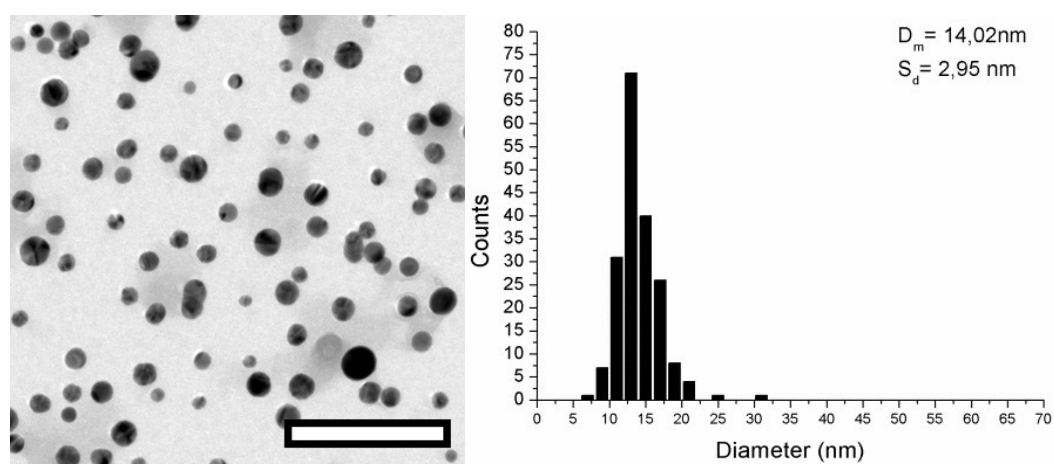

**Figure S5.** On the left: TEM micrograph of Au-PEG<sub>5000</sub> NPs (scale bar 100 nm). On the right: distribution of Au-PEG<sub>5000</sub> NP diameters evaluated by ImageJ.

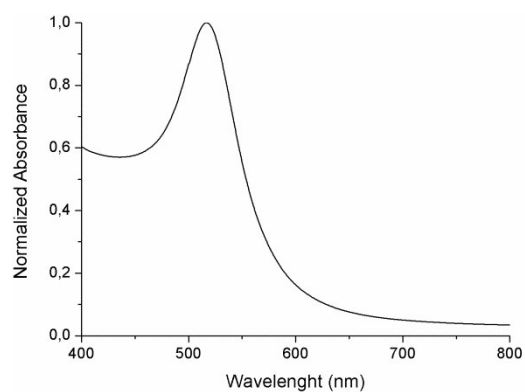

**Figure S6.** UV-visible spectrum of of Au-PEG<sub>5000</sub> NPs

|                                     |                                             |
|-------------------------------------|---------------------------------------------|
| <b><math>\zeta</math>-potential</b> | <b><math>-21,8 \pm 9,1\text{ mV}</math></b> |
| <b>Hydrodynamic Diameter</b>        | <b><math>25,0 \pm 13,1\text{ nm}</math></b> |

**Table S3.**  $\zeta$ -potential and hydrodynamic diameter of Au-PEG<sub>5000</sub> NPs obtained with dynamic light scattering technique.



### Au-Alkyl-PEG<sub>600</sub> NPs

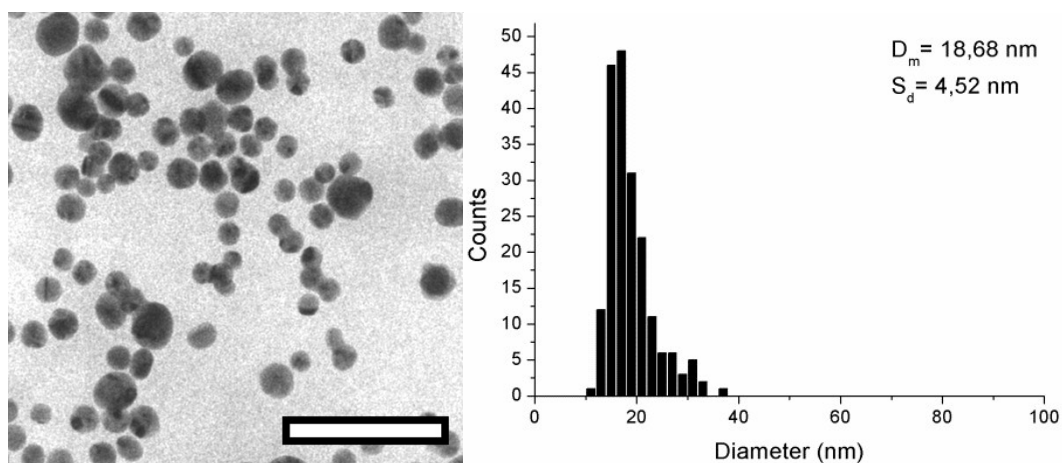

**Figure S7.** On the left: TEM micrograph of Au-Alkyl-PEG<sub>600</sub> NPs (scale bar 100 nm). On the right: distribution of Au-PEG<sub>5000</sub> NP diameters evaluated by ImageJ.

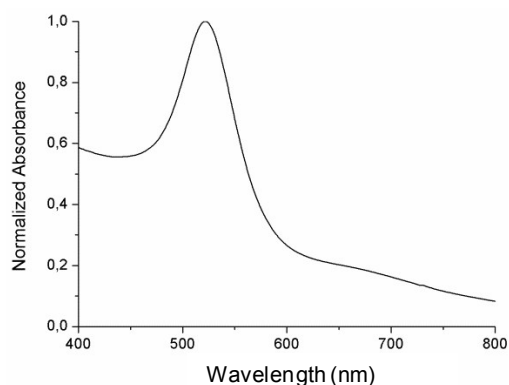

**Figure S8.** UV-visible spectrum of Au-Alkyl-PEG<sub>600</sub> NPs

|                              |                        |
|------------------------------|------------------------|
| <b>ζ-potential</b>           | <b>-19,8 ± 11,7 mV</b> |
| <b>Hydrodynamic Diameter</b> | <b>33,6 ± 20 nm</b>    |

**Table S4.** ζ-potential and hydrodynamic diameter of Au-Alkyl-PEG<sub>600</sub> obtained with dynamic light scattering technique.

### S6. Labelling of the Au NPs with ATTO550 NHS ester

The buffer employed to perform the fluorescent labelling was prepared by mixing 20 parts of a PBS buffer (Phosphate-Buffered Saline, pH 7.4) with 1 part of 0.2 M NaHCO<sub>3</sub> solution, adjusted to pH 9.0 with 2 M NaOH. The labelling buffer should have a pH of 8.3, optimal for the reaction. 3mg of Au NPs have been dissolved into 2 ml of buffer. 1.5 eq of ATTO550 NHS ester (stocked in 1 mg/ml DMSO Dry solution) was added for each free amino groups present in the reaction mixture. The mixture was sonicated for the first 10 minutes and then let to react for 1 h at ROOM TEMPERATURE under vigorous stirring. The excess of ATTO550 NHS ester was removed by centrifugal filtration on Amicon centrifugal filters (30 kDa cut-off).

The purification of the labelled Au NPs was completed using dialysis tubes with a cut-off of 100 kDa (48 hours, 6 changes of water).

## S7. Characterisation of fluorescent labelled Au NPs

### Au-MSA NPs\*

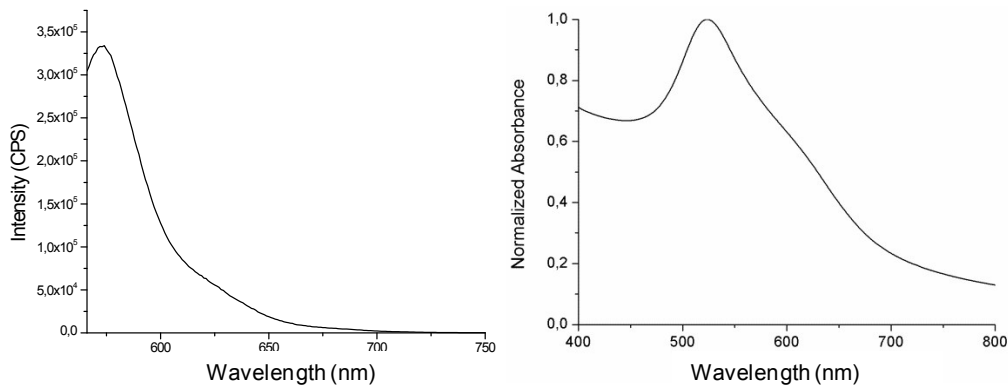

**Figure S9.** On the left: Fluorescence spectrum of Au-MSA NPs\*. On the right: UV-visible spectrum of Au-MSA NPs\*.

### Au-Glucosamine NPs\*

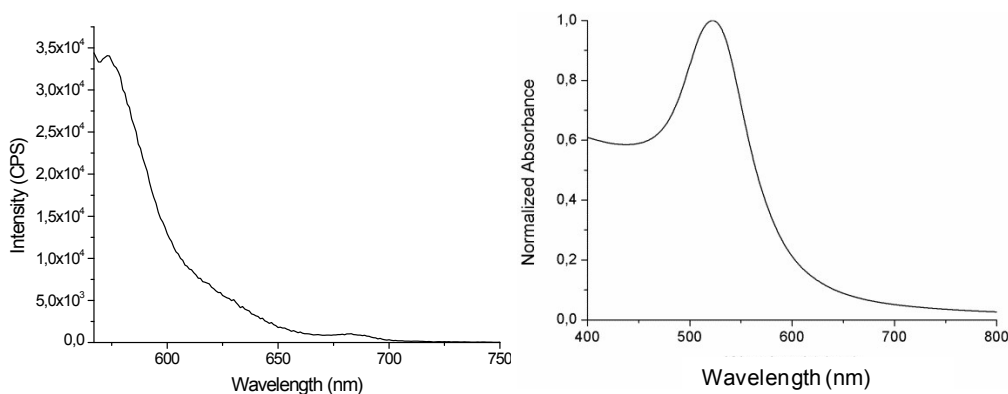

**Figure S10.** On the left: Fluorescence spectrum of Au-Glucosamine NPs\*. On the right: UV-visible spectrum of Au-Glucosamine NPs\*.

### Au-PEG<sub>5000</sub> NPs\*

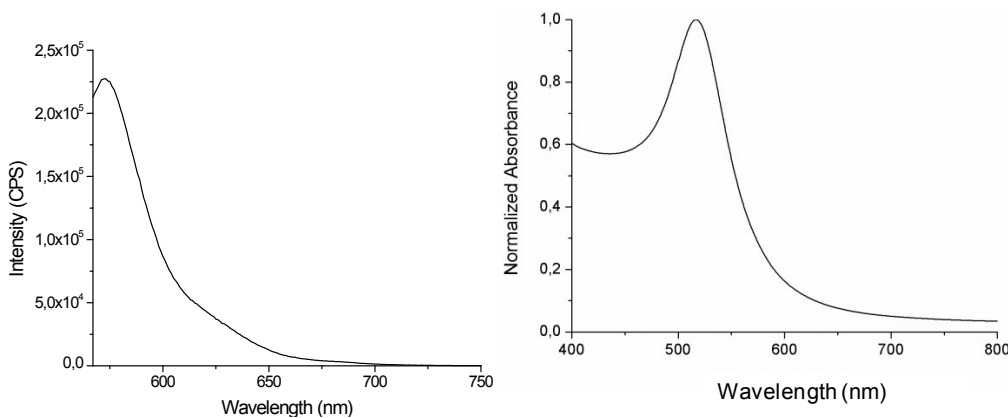

**Figure S11.** On the left: Fluorescence spectrum Au-PEG<sub>5000</sub> NPs\*. On the right: UV-visible spectrum of Au-PEG<sub>5000</sub> NPs\*.

**Au-Alkyl-PEG<sub>600</sub> NPs\***

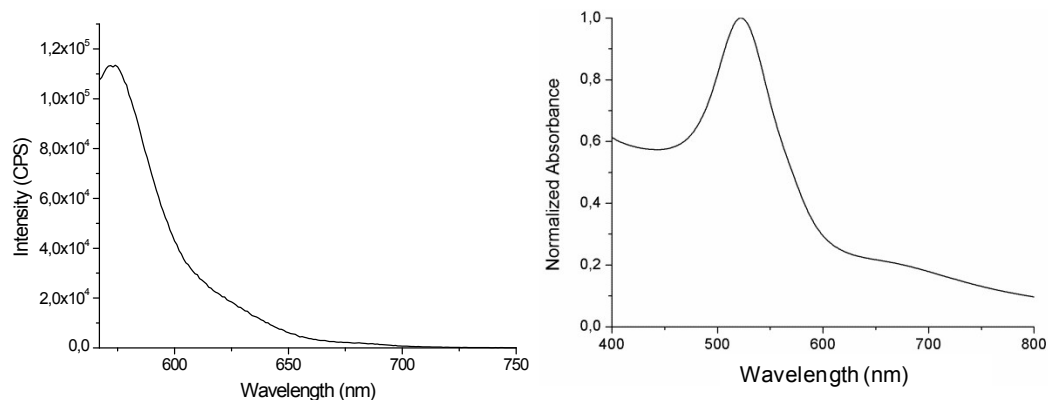

**Figure S12.** On the left: Fluorescence spectrum Au-Alkyl-PEG<sub>600</sub> NPs\*. On the right: UV-visible spectrum of Au-Alkyl-PEG<sub>600</sub> NPs\*.

## S8. Au NPs Hydrodynamic diameter in water

### Fluorescence correlation spectroscopy (FCS)

The procedure applied to determine Au NPs hydrodynamic radius in water solution is comprised of 3 steps (Scheme S1):

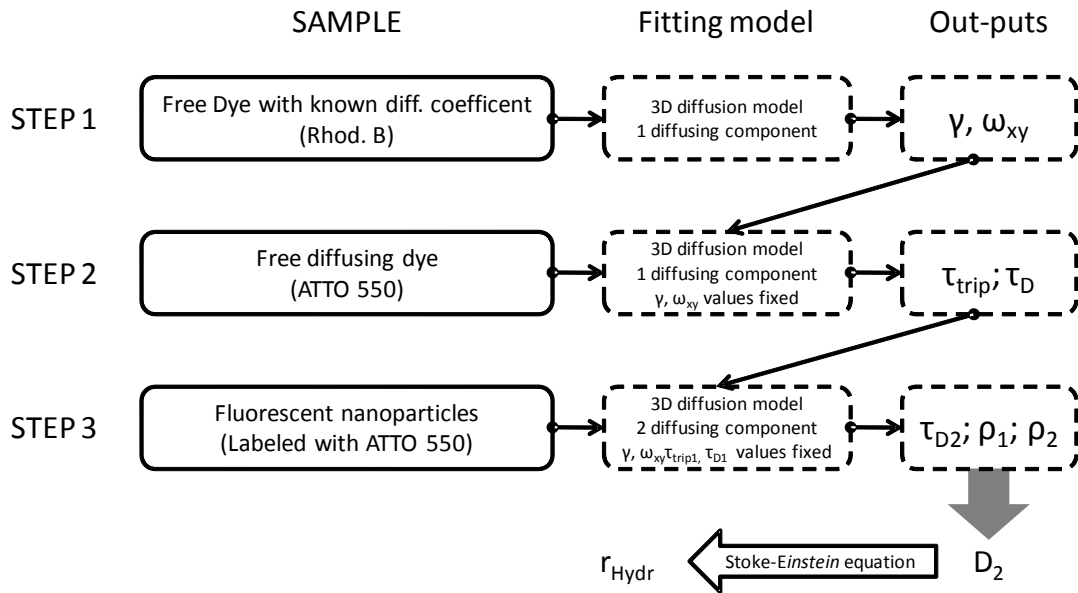

**Scheme S1.** Flow chart of the procedure for the FCS data elaboration

**Step 1:** Consist in the calibration of the instrument. Prior to each session of measurements 50 nM solution of a dye with known diffusion coefficient has been employed for the determination of the structural parameter of the system. The correlogram of the solution was registered and the autocorrelation functions  $G(\tau)$  was fitted following a 3D diffusion model that can be denoted as:

$$G(\tau) = G_{\infty} + \frac{1}{N} X_{back} \cdot \left( \frac{1 - \theta_{non} + \theta_{non} e^{-\tau/\tau_{non}} - \theta_{trip} + \theta_{trip} e^{-\tau/\tau_{trip}}}{1 - \theta_{non} - \theta_{trip}} \right) \cdot [(1 - \rho_2 - \rho_3) \cdot g_1(\tau) + \rho_2 \cdot g_2(\tau) + \rho_3 \cdot g_3(\tau)]$$

Where the factor  $g_i(\tau)$  is correspondent to:

$$g_i(\tau) = \left( 1 + \frac{\tau}{\tau_{diff,i}} \right)^{-1} \cdot \left( 1 + \frac{\tau}{\gamma^2 \tau_{diff,i}} \right)^{-1/2}$$

The background correction is calculated like:

$$X_{back} = \frac{(I - B)^2}{I^2}$$

$I$  is the intensity of the signal and  $B$  is background intensity.

The parameters involved in the function are:

- $G_{\infty}$ : offset of the correlation function
- $N$ : overall particle number (including currently dark particles, for example in triplet state)
- $\theta_{trip}$ ,  $\theta_{non}$ : fractions of the particles in one of the first two non-fluorescent states
- $\tau_{trip}$ ,  $\tau_{non}$ : decay times of the first two non-fluorescent states
- $\rho_1, \rho_2, \rho_3$  ( $\rho_1 = 1 - \rho_2 - \rho_3$ ): fractions of the three diffusing components
- $\tau_{diff,i}$ : diffusion decay time of the  $i$ th diffusing component
- $\gamma, \omega_{xy}$ : structural parameters of the instruments that represent the ratio of the Gaussian used to approximate the focus
- $\omega_{xy}$ : lateral half axis of the focus
- $z_0$ : longitudinal half axis of the focus
- $\langle cps \rangle$ : average background corrected intensity during the measurement

We chose Rhodamine B to perform the calibration, that is reported in literature to have a diffusion coefficient of  $420 \pm 30 \mu\text{m}^2/\text{s}$ .<sup>7</sup> Knowing that the diffusion coefficient is equal to:

$$D = \frac{\omega_{xy}^2}{4\tau_D}$$

and imposing  $\tau_D$  value inside a first order fitting model, we derived the values of  $\gamma$  and  $\omega_{x,y}$  that describes the geometrical properties of the focal volume. For our system, the  $\gamma$  value was typically comprised between 5 and 7,  $\omega_{x,y}$  between 200 and 300 nm.

**Step 2:** Once obtained the structural parameters of the confocal volume is possible to proceed with the measurement of the free diffusing dye (50 nM). The fitting of the auto-correlogram of free diffusing ATTO550 has been performed employing the same model and algorithm as in step 1. Fixing the previously obtained values of  $\gamma$  and  $\omega_{x,y}$  in the fitting model is possible to derive the values of  $\tau_{\text{trip}}$ ,  $\tau_D$  typical of the fluorophore. Performing more than 20 measurements on free ATTO550 we obtained an average diffusion coefficient of the fluorophore of  $405 \pm 23 \mu\text{m}^2/\text{s}$  (Diffusion time  $43 \pm 4 \mu\text{s}$ , detection volume  $265 \pm 10 \text{ fl}$ )

**Step 3:** Finally the auto-correlogram of the fluorescent nanoparticle solution (100  $\mu\text{g}/\text{ml}$ ) can be registered. The fitting of the auto-correlation function was performed employing a 3D diffusion model and considering 2 diffusing species: in fact despite the purification procedures a fraction of free diffusing dye was still detected in the samples. The two component fitting was chosen considering the statistical improvement. It is important to underline that this free fraction was always overestimated. In fact gold nanoparticles quench the dye molecules directly attached to their surface while enhance the fluorescence of the free dye fraction diffusing in their proximity<sup>48</sup>. The parameters of  $\gamma$ ,  $\omega_{x,y}$ ,  $\tau_{\text{trip}}$  and the  $\tau_D$  of the first specie were fixed to the values experimentally determined from steps 1 and 2. The fitting function will return the value of  $\tau_{D2}$ , corresponding to the diffusion time of the second specie present in solution (in our case the labelled gold nanoparticles). From the fitting function is possible to calculate also the fractions of the two populations composing the sample (residual free dye and labelled Au NPs). At the end, once derived the diffusion coefficient, employing Stoke-Einstein equation is possible to calculate the hydrodynamic radius of the NPs (Table S5).

|                                   | TEM                |            | FCS        |            |                        |
|-----------------------------------|--------------------|------------|------------|------------|------------------------|
|                                   | Core diameter (nm) | $S_d$ (nm) | $D_h$ (nm) | $S_d$ (nm) | Diameter increase (nm) |
| Au-MSA* NPs                       | 22.1               | 5.7        | 30.3       | 2.9        | 8.2                    |
| Au-Glucosamine* NPs               | 18.8               | 4.5        | 24.8       | 5.4        | 6.0                    |
| Au-PEG <sub>5000</sub> * NPs      | 14.0               | 3.0        | 28.0       | 5.0        | 14.0                   |
| Au-Alkyl-PEG <sub>600</sub> * NPs | 18.7               | 4.5        | 27.8       | 1.7        | 9.1                    |

**Table S5.** Summary of the diameters obtained by TEM micrographs and FCS spectroscopy with relative diameter increases.

### Dynamic light scattering (DLS)

The hydrodynamic diameter of the Au NPs has been measured by mean of DLS, employing not fluorescent Au NPs. For each nanoparticle, 3 independent measurements were performed and mediated. In Table S6 are reported the diameter values for each nanoparticle, correlated with standard deviation and diameter increase in respect to the metallic core (obtained by TEM micrographs). The values are reported in terms of volume abundance and the standard deviation is referred to the half amplitude of the Gaussian dimensional distribution.

|                                 | TEM                |                     | DLS                 |                     |                        |
|---------------------------------|--------------------|---------------------|---------------------|---------------------|------------------------|
|                                 | Core diameter (nm) | S <sub>d</sub> (nm) | D <sub>h</sub> (nm) | S <sub>d</sub> (nm) | Diameter increase (nm) |
| Au-MSA NPs                      | 22.1               | 5.7                 | 32.7                | 17.2                | 10.6                   |
| Au-Glucosamine NPs              | 18.8               | 4.5                 | 31.0                | 14.0                | 12.2                   |
| Au-PEG <sub>5000</sub> NPs      | 14.0               | 3.0                 | 25.0                | 13.1                | 11.0                   |
| Au-Alkyl-PEG <sub>600</sub> NPs | 18.7               | 4.5                 | 33.6                | 20.0                | 15.0                   |

**Table S6.** Summary of the diameters obtained by TEM micrographs and DLS with relative radius increases.

### UV-visible

From the UV-vis spectra is possible to determine the diameter of the NPs, by using the following formula:

$$D_H = \exp\left[\frac{A_{spr}}{A_{450}}(B_1 - B_2)\right] \quad \text{eq. 1}$$

Where A<sub>spr</sub> is the absorbance of the plasmonic peak A<sub>450</sub> is the absorbance at 450 nm and B<sub>1</sub> and B<sub>2</sub> are experimentally determined values (B<sub>1</sub>= 3,55 and B<sub>2</sub>=3,11)<sup>6</sup>.

The diameter of the Au NPs has been measured with non fluorescent Au NPs. In Table S7 are reported the diameter values for each nanoparticle, correlated with standard deviation and diameter increase in respect to the metallic core (obtained by TEM micrographs). The reported values are the average of three independent measurements.

|                                 | TEM                |                     | UV-vis              |                     |                        |
|---------------------------------|--------------------|---------------------|---------------------|---------------------|------------------------|
|                                 | Core diameter (nm) | S <sub>d</sub> (nm) | D <sub>h</sub> (nm) | S <sub>d</sub> (nm) | Diameter increase (nm) |
| Au-MSA NPs                      | 22.1               | 5.7                 | 28.0                | 1.5                 | 5.8                    |
| Au-Glucosamine NPs              | 18.8               | 4.5                 | 28.1                | 1.1                 | 9.2                    |
| Au-PEG <sub>5000</sub> NPs      | 14.0               | 3.0                 | 22.8                | 1.7                 | 8.8                    |
| Au-Alkyl-PEG <sub>600</sub> NPs | 18.7               | 4.5                 | 25.3                | 1.3                 | 13.2                   |

**Table S7.** Summary of the diameters obtained by TEM micrographs and UV-visible spectroscopy with relative radius increases.

## S9. Au NPs hydrodynamic diameter in full RPMI cellular medium.

### Fluorescence correlation spectroscopy (FCS)

Stock solutions of ATTO550 labelled Au NPs with a concentration of 1mg/ml were prepared with a 10% in volume of FBS. The FCS measurements were registered 10 min, 20 min, and 1h after the mixing of the solutions. Each sample of NPs was measured in 3 independent experiments, comprised by 10 runs of 10 seconds each one. As comparison, a FCS measurement was performed on bare NPs. Prior to each FCS measurement the solutions were sonicated for 5 min and double filtered on 0.22  $\mu\text{m}$  regenerate cellulose syringe filters. This operation helps to remove the excess of free fluorophore that can remain electrostatically attached to the surface of the Au NPs. To perform the FCS measurements 25  $\mu\text{l}$  of Au NPs were dissolved in 225  $\mu\text{l}$  of a solution of phenol red free RPMI, enriched NPs in RPMI. For each measurement session 50 nM water solutions of Rhodamine B and of ATTO550 were measured to determine the structural parameter and the diffusion coefficient of the free dye. The diffusion coefficient of proteins was determined mixing 25  $\mu\text{g}$  of FBS with a 50 nM solution ATTO550 in RPMI.

The procedure applied to determine Au NP hydrodynamic radius in full RPMI medium is comprised of 4 steps (1<sup>st</sup> and 2<sup>nd</sup> are identical to the procedure applied for Au NP water solutions)(Scheme S2).

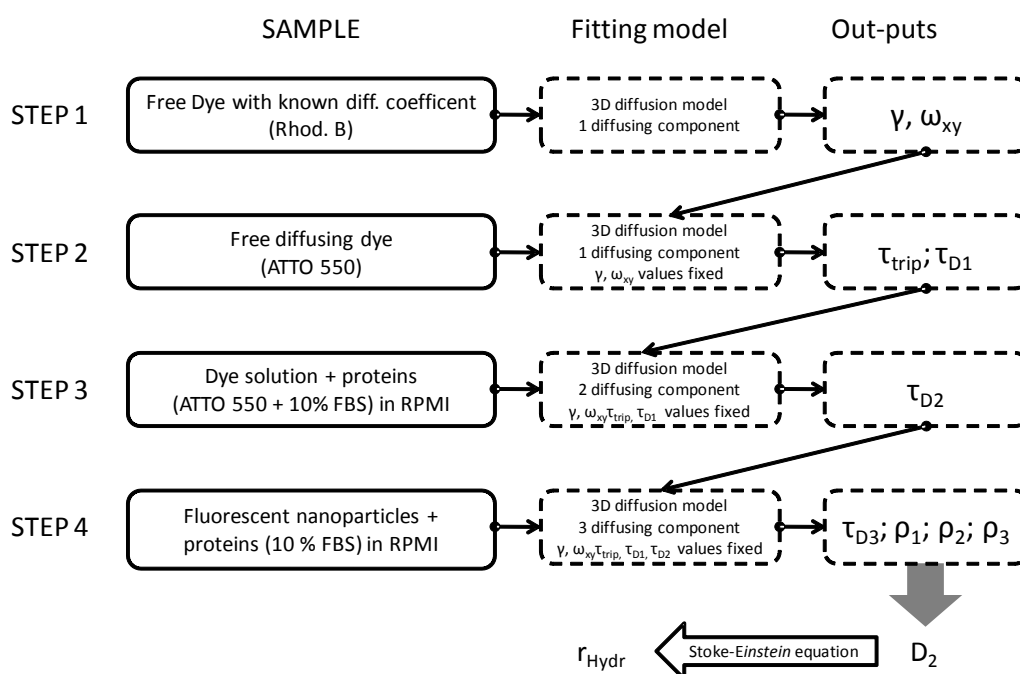

**Scheme S2.** Flow chart of the procedure for the FCS data elaboration in protein solutions.

**Step 1:** Calibration of the instrument. Registration of the correlograms of a 50 nM Rhodamine B solution with known diffusion time and determination of the structural parameter of the system ( $\gamma$  and  $\omega_{x,y}$ ).

**Step 2:** Measurement of the free diffusing dye (ATTO550). Fixing the previously obtained values of  $\gamma$  and  $\omega_{x,y}$  in the fitting model, is possible to derive the values of  $\tau_{trip}, \tau_D$  typical of the fluorophore.

**Step 3:** The auto-correlogram of a mixture of ATTO550 solution in RPMI with a 10% of FBS has been registered. The fitting of the autocorrelation function is performed employing a 3D diffusion model and considering 2 diffusing species. The parameters of  $\gamma, \omega_{xy}, \tau_{trip}$  and the  $\tau_D$  of the first specie were fixed to the values experimentally determined from steps 1 and 2. The fitting function will return the value of  $\tau_{D2}$ , corresponding to the diffusion time of the second specie present in solution (in this case the protein mixture). From the fitting function is possible to calculate also the fractions of the two populations composing the sample (residual free dye and proteins).

**Step 4:** Finally the auto-correlogram of the fluorescent nanoparticle solution (100  $\mu\text{g/ml}$ ) in 10% of FBS (RPMI solution) can be registered at different time points. The fitting of the auto-correlation function is performed employing a 3D diffusion model and considering 3 diffusing species. The parameters of  $\gamma$ ,  $\omega_{xy}$ ,  $\tau_{\text{trip}}$ ,  $\tau_{D1}$ , and  $\tau_{D2}$  of the first and second species were fixed to the values experimentally determined from steps 1, 2 and 3. The fitting function will return the value of  $\tau_{D3}$ , corresponding to the diffusion time of the third specie present in solution (corresponding to the adducts between proteins and Au NPs). From the fitting function is possible to calculate also the fractions of the three populations composing the sample (residual free dye, free proteins and AuNP-Protein adducts). Employing **eq. 12** is possible to derive, from the diffusion time, the diffusion coefficient and substituting the last one in Stoke-Einstein equation the hydrodynamic radius.



## Dynamic light scattering (DLS)

To perform the DLS study of PC formation, 50  $\mu\text{l}$  of not fluorescent Au NPs (1mg/ml) were dissolved a solution of phenol red free full RPMI. The NPs were incubated for 10 min, 20 min, and 1h at 37  $^{\circ}\text{C}$ . The experiments were performed registering for each NP 3 tracks at 37  $^{\circ}\text{C}$ , each one composed of 10 runs of 10 seconds. The system was allowed to equilibrate for 2 min prior to each measurement. The data were analyzed employing Zetasizer software from Malvern and reported in terms of volume abundance. The resulting correlograms are reported in Figure S13. Simply comparing the normalized correlograms of the NPs at different time points is possible to distinguish which of them are less inclined to interact with the proteins. In fact it is possible to appreciate that the correlograms of Au-MSA NPs and Au-Glucosamine NPs in FBS solutions show large shifts in the lag time during the incubation period indicating hydrodynamic dimensions increase. Instead for Au-PEG<sub>5000</sub> NPs and Au-Alkyl-PEG<sub>600</sub> NPs correlograms the shifts are reduced indicating a lower affinity between the coating and the proteins.

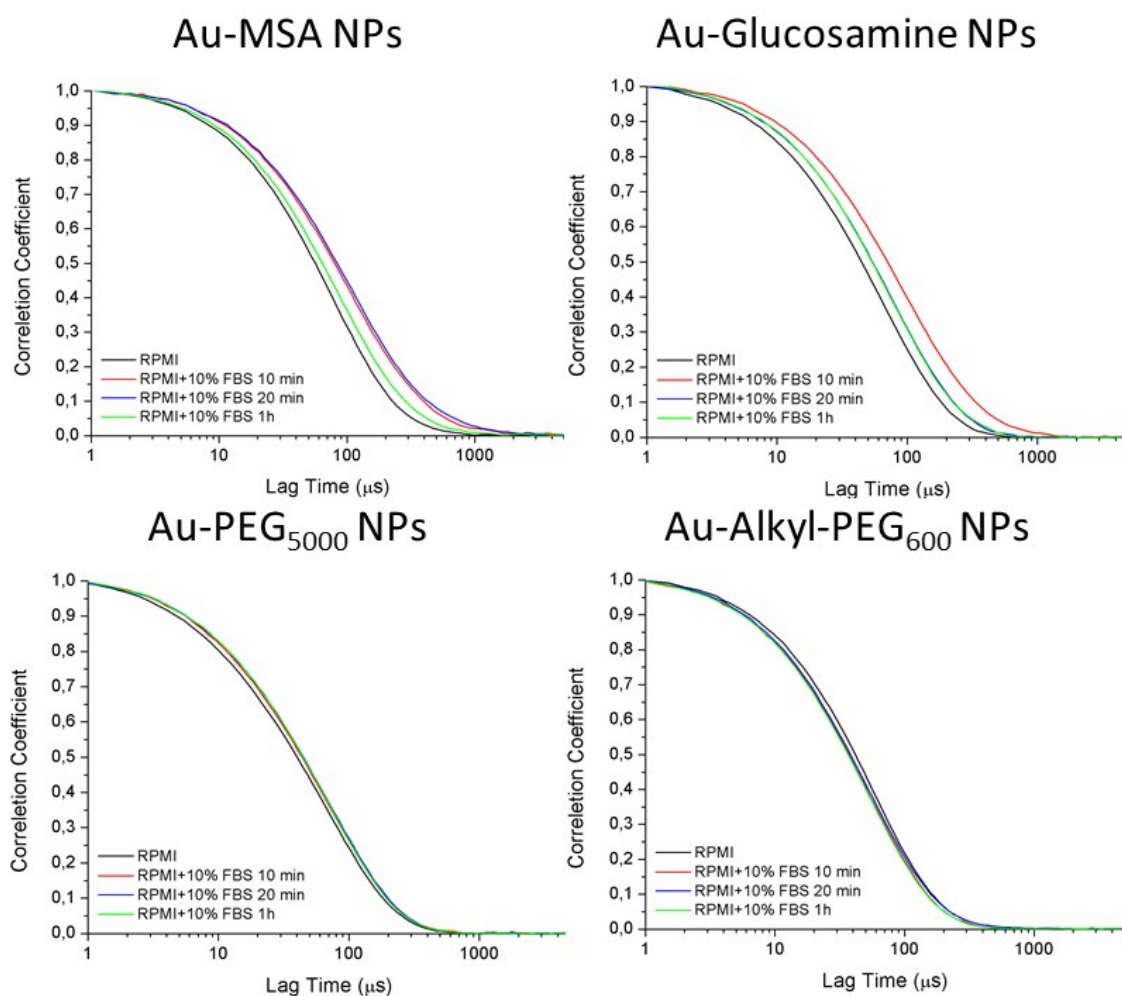

**Figure S13.** Correlograms of Au-MSA NPs, Au-Glucosamine NPs, Au-PEG<sub>5000</sub> NPs, Au-Alkyl-PEG<sub>600</sub> NPs incubated in bare and full RPMI (enriched with a 10% of FBS) at different time points.

## UV-visible

To perform the UV-vis study of PC formation, 50  $\mu$ l of not fluorescent Au NPs (1mg/ml) were dissolved a solution of phenol red free full RPMI (10% FBS). The NPs were incubated for 1 and 24 hours at 37  $^{\circ}$ C. The experiments were performed in triplicate at 25  $^{\circ}$ C. A UV-vis spectrum of bare NPs in RPMI has been registered. A solution of full RPMI was employed as baseline. Equation 1 was employed to derive the Au NPs diameters and the results are summarized in Figure S14.

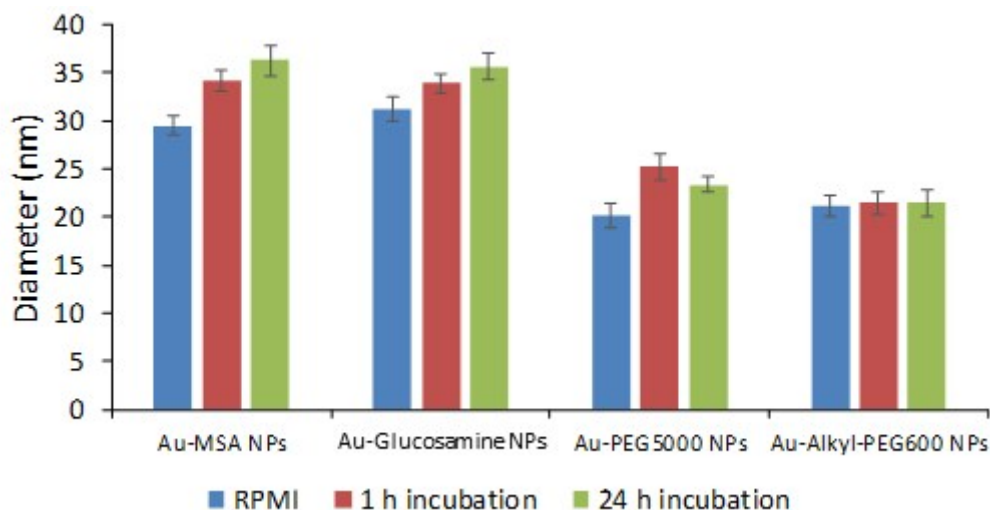

**Figure S14.** Hydrodynamic diameter calculated by UV-vis spectroscopy during the incubation of Au NPs with bare RPMI and full RPMI (enriched with 10% of FBS).

The plasmonic peak shift has been monitored during the observation time. The increase in the wavelength can be directly correlated with a growth in the gold structure dimensions. The smallest shift was observed for Au-Alkyl-PEG<sub>600</sub> NPs (Figure S15 orange line), showing a increment of only 0.5 nm after 24 hours of incubation.

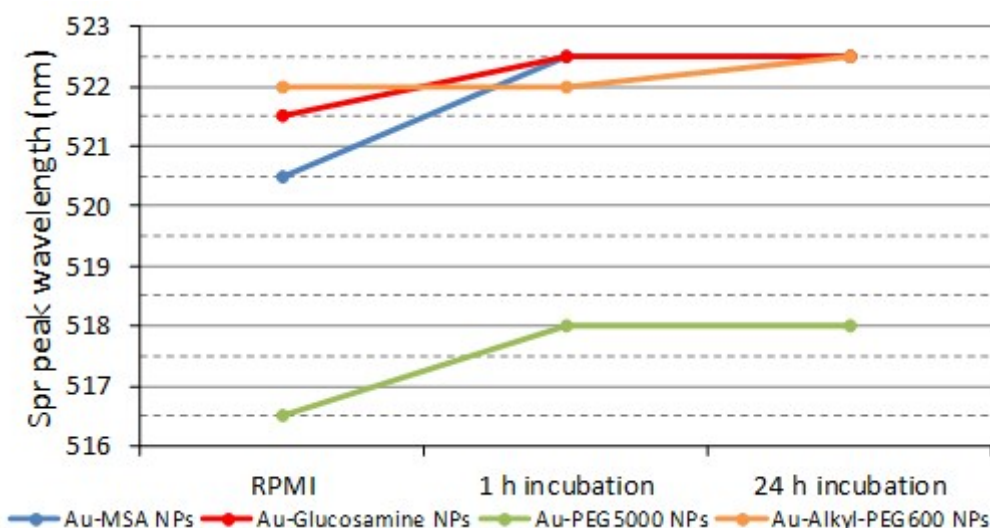

**Figure S15.** Plasmonic peak wavelength variation during the incubation of Au NPs with bare RPMI and full RPMI (enriched with 10% of FBS).

## S10. FCS measurements in living cell

FCS measurements were done on at least 3 cells recording 20 runs of 10 second each in 8 distinct area inside the cell: 2 in the cytoplasm; 2 in the endoplasmatic and whenever visible, 2 in brighter spots near to the membrane (endocytic vesicles) and 2 in brighter spots near to the nucleus (intracellular vesicles). Moreover 1 experiment was performed on/close to the membrane and 1 on/close the nucleus. Tracks were at first screened one-by-one to remove tracks showing bleaching, low signal and visible aggregates (see Fig. S17). FCS experiments performed on/close to membrane and nucleus shown poor/no correlation and the registered diffusion times were associated to proteins ( $\tau_D < 500 \mu s$ ) rather than NPs (Fig. S18). For these reason the nucleus and membrane were excluded from the regions of interest in the data elaboration. The remaining tracks were fitted one-by-one by QuickFit 3.0 software<sup>7</sup> using a 3D Normal diffusion Fit model. The fit algorithms used were in order, Simulated Annealing with box constraints and the Levenberg-Marquardt Algorithm with box constraints with one non-fluorescent state and 2(or 3) diffusing components. Considering the decay time ( $\tau_D, \mu s$ ) of the most abundant specie (fraction  $\Phi > 0.5$ ), the tracks were grouped as follow:  $500 < \tau_D (\mu s) < 1500$ ;  $1500 < \tau_D (\mu s) < 3000$ ;  $3000 < \tau_D (\mu s) < 6000$ ;  $\tau_D (\mu s) > 6000$ . The average track was fitted again and the average decay time with the correspondent standard deviation calculated. The procedure was repeated for each measurement of each cell compartment. Finally decay times were averaged per compartment considering all cell replicates referring to the above-mentioned decay times grouping. The percentage of tracks representative of the species decaying with the latter diffusion times were calculated over the total of the good tracks analyzed in all cell replicates. The obtained results are summarized in Figure S19 and S20.

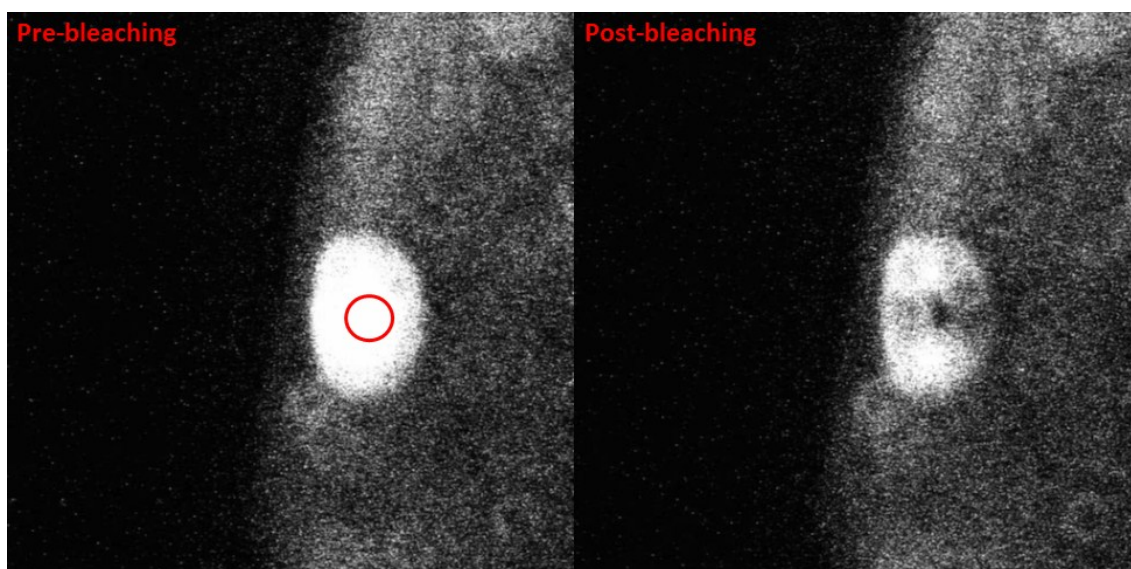

**Figure S16.** Confocal images pre and post bleaching, demonstrating the alignment between the FCS and confocal setups.

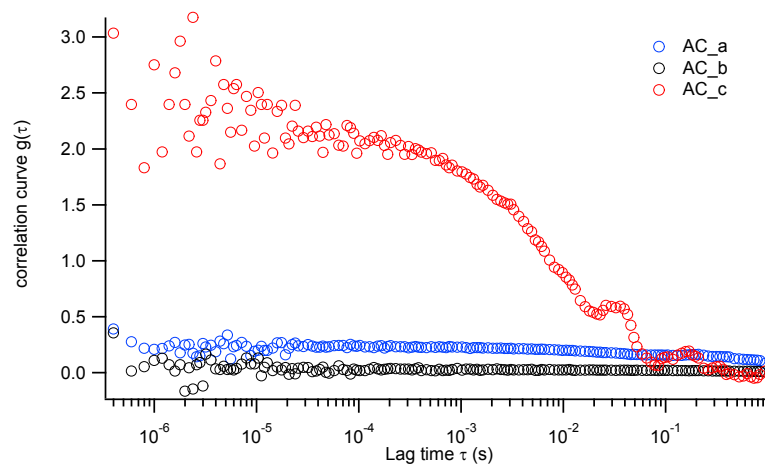

**Figure S17.** Representative correlation function of the excluded track showing bleaching (AC\_a, blue dots), low signal (AC\_b, black dots) and visible aggregates (AC\_c, red dots).

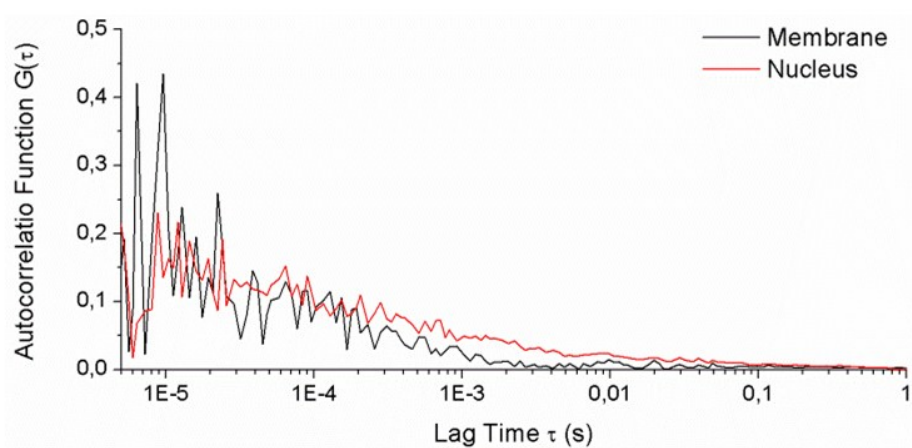

**Figure S18.** Representative FCS autocorrelation function for the membrane and nucleus of the cell (Au-MSA\* NPs). The intensity signal registered in these regions was too low to be included in the statistical analysis.

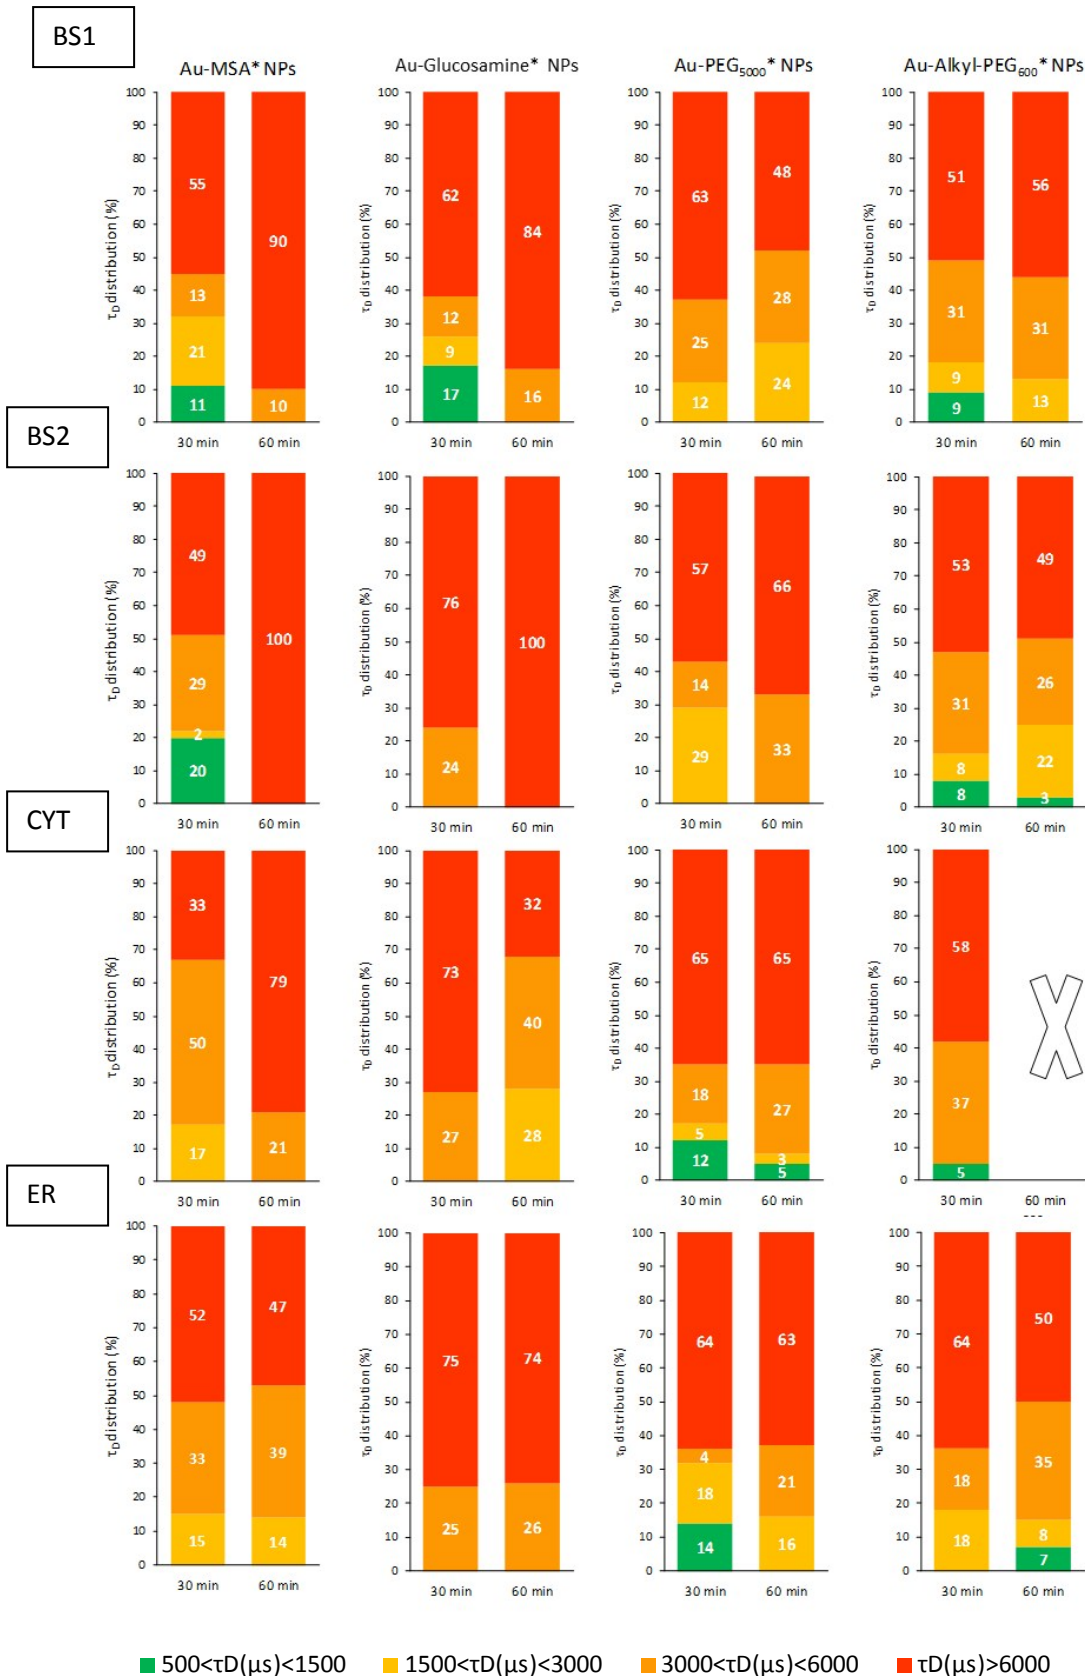

**Figure S19.** Percentage distribution of the  $D_{fast}$  in the different compartments of the cell grouped in four classes of diffusion times (green= $500 < \tau_D (\mu s) < 1500$ ; yellow= $1500 < \tau_D (\mu s) < 3000$ ; orange= $3000 < \tau_D (\mu s) < 6000$  and red= $\tau_D (\mu s) > 6000$ ). In each column of the table are reported the results for Au-MSA\* NPs, Au-Glucosamine\* NPs, Au-PEG<sub>5000</sub>\* NPs and Au-Alkyl-PEG<sub>600</sub>\* NPs at 30 minutes and 1 hour of incubation.



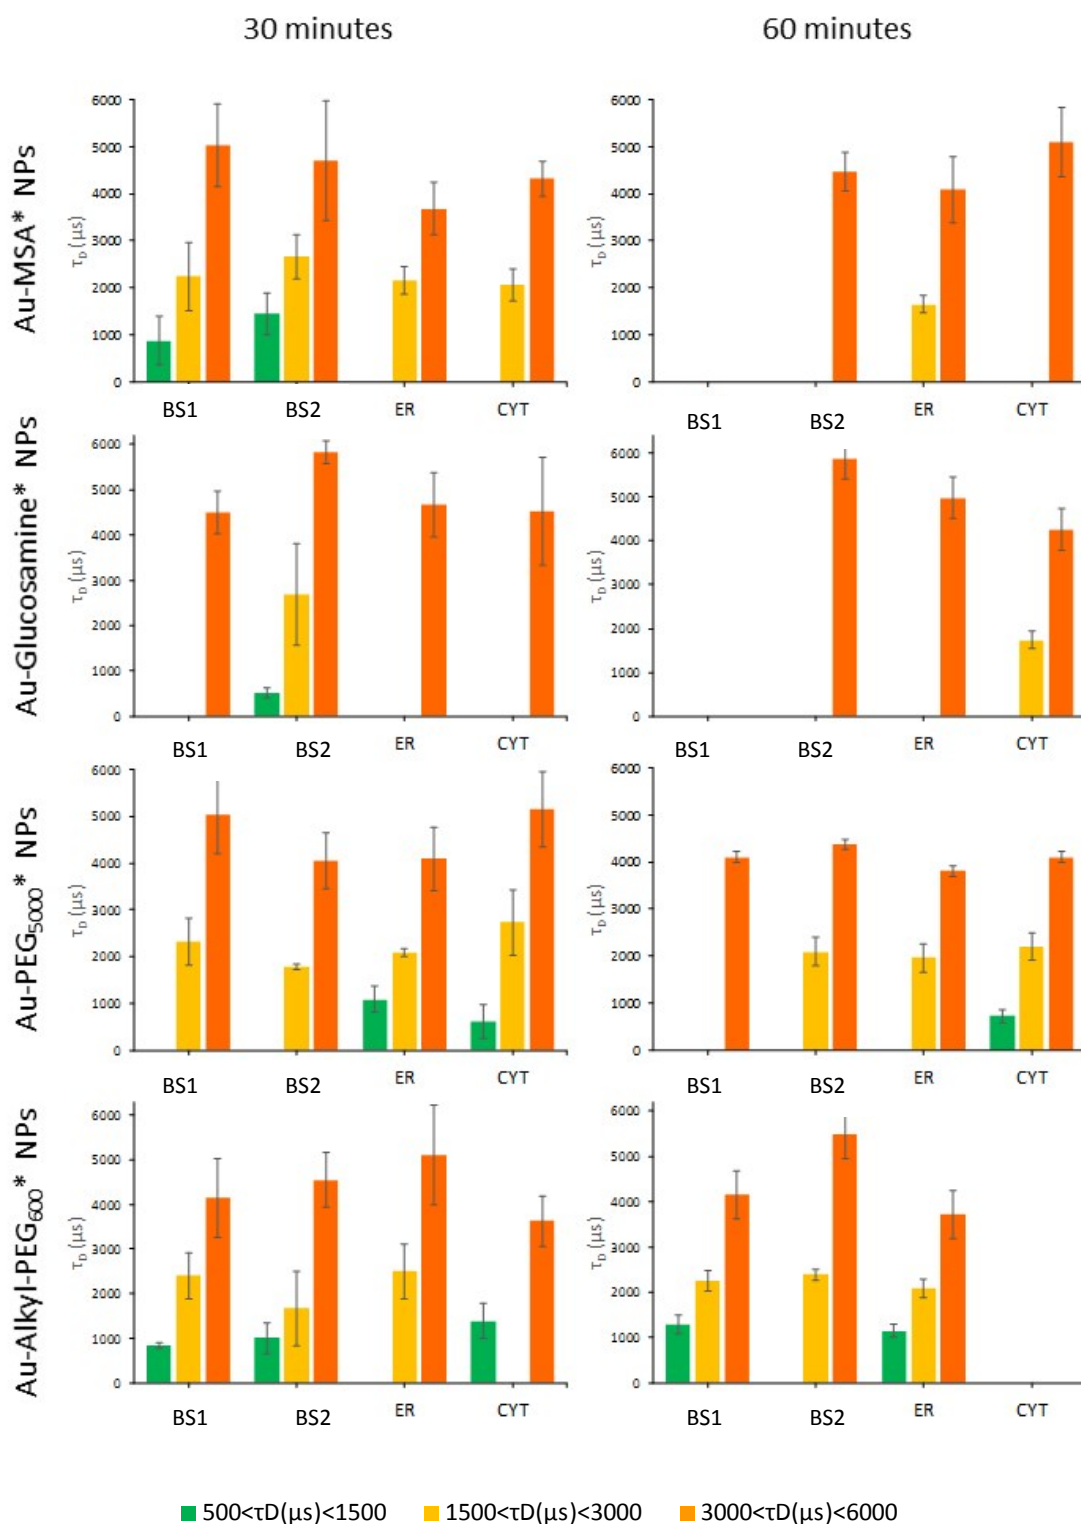

**Figure S20.** Histograms of the mean diffusion times for each region of interest (obtained after the grouping of the travels in the four classes of diffusion times). Each histogram reports the results for Au-MSA\* NPs, Au- Glucosamine\* NPs, Au-PEG<sub>5000</sub>\* NPs and Au-Alkyl-PEG<sub>600</sub>-C<sub>4</sub>H<sub>9</sub>\* NPs at 30 minutes and 1 hour of incubation. BS1=bright spots 1; BS2= bright spots 2; ER=Endoplasmatic reticulum; CYT=Cytoplasm.

A control has been performed incubating free ATTO550 with A549 cells. To perform FCS on live cells, 10.000 A549 cells were seeded on Nunc™ Lab-Tek Chambered Coverglass (purchased from Thermo Fisher Scientific) and grown in a humidified atmosphere at 37 °C with 5% CO<sub>2</sub> for 24 hours. The cells

were incubated with 7 nM solution of ATTO550 NHS ester for 30 and 60 minutes. The cells were washed twice with warm PBS. To perform the experiments on living cells, they were kept in Hepes 10 mM. The data were analyzed as presented above. Due to presence of several traces presenting  $\tau_D < 500 \mu s$ , a fifth group of traces was considered. Almost the totality of the traces presents diffusion times lower than  $500 \mu s$  or higher then 6000, ascribable respectively to the dye interacting with proteins or with cellular machinery (Table S8 and Table S9). The diffusion free dye showed a diffusion time distribution and intracellular trafficking completely different from the labelled Au NPs.

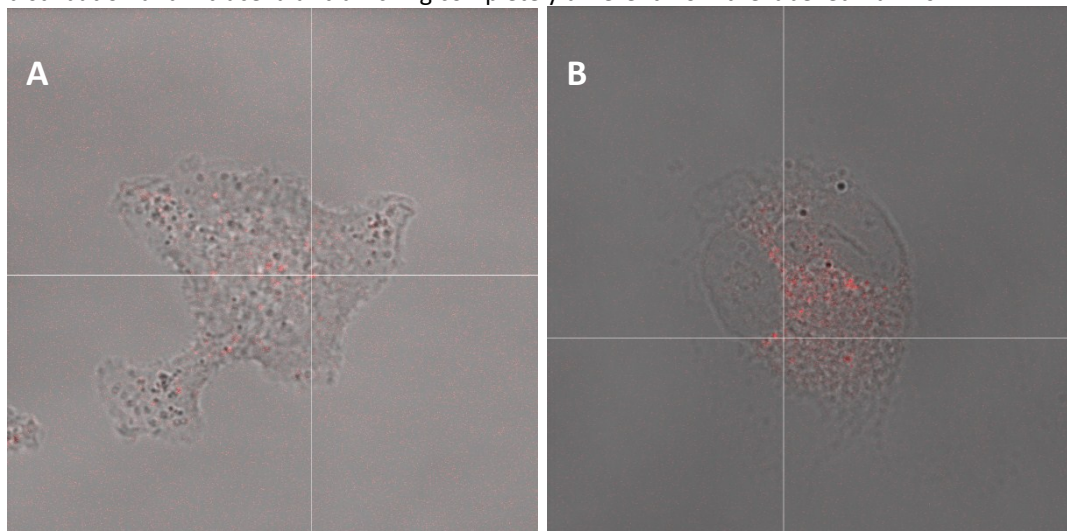

**Figure S21.** Confocal images of A549 cells incubated with free ATTO550 at 30 minutes (a) and 1 hour (b)

|            | $\tau_D(\mu s) < 500$ | $500 < \tau_D(\mu s) < 1500$ | $1500 < \tau_D(\mu s) < 3000$ | $3000 < \tau_D(\mu s) < 6000$ | $\tau_D(\mu s) > 6000$ |
|------------|-----------------------|------------------------------|-------------------------------|-------------------------------|------------------------|
| <b>BS1</b> | 59%                   | 0%                           | 5%                            | 6%                            | 30%                    |
| <b>BS2</b> | 80%                   | 0%                           | 10%                           | 4%                            | 6%                     |
| <b>CYT</b> | 69%                   | 0%                           | 8%                            | 0%                            | 23%                    |
| <b>ER</b>  | 73%                   | 0%                           | 0%                            | 7%                            | 21%                    |

**Table S8.** Free ATTO550 control after 30 minutes of incubations: percentage distribution of the diffusion times grouped in 5 classes.

|            | $\tau_D(\mu s) < 500$ | $500 < \tau_D(\mu s) < 1500$ | $1500 < \tau_D(\mu s) < 3000$ | $3000 < \tau_D(\mu s) < 6000$ | $\tau_D(\mu s) > 6000$ |
|------------|-----------------------|------------------------------|-------------------------------|-------------------------------|------------------------|
| <b>BS1</b> | 76%                   | 0%                           | 4%                            | 0%                            | 20%                    |
| <b>BS2</b> | 87%                   | 0%                           | 0%                            | 0%                            | 13%                    |
| <b>CYT</b> | 85%                   | 0%                           | 0%                            | 4%                            | 11%                    |
| <b>ER</b>  | 79%                   | 0%                           | 0%                            | 0%                            | 21%                    |

**Table S9.** Free ATTO550 control after 60 minutes of incubation: percentage distribution of the diffusion times grouped in 5 classes.

## S11. Confocal imaging of cells

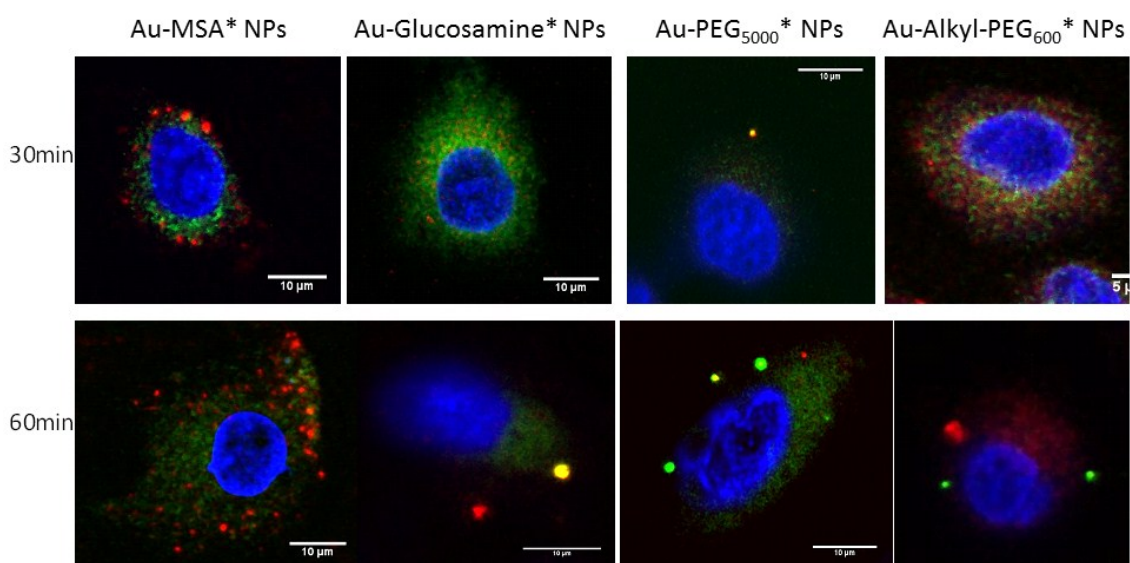

**Figure S22.** Confocal micrographs collected after 30 min and 1 hour of incubation. Nuclei were stained by Hoechst (blue signal), NPs were labelled by ATTO550 (red signal) and endoplasmatic reticulum stained by ER-Tracker Green (green signal). Cells were imaged in transmission mode. Excitation laser wavelengths were respectively 405 nm, 488 and 561 nm. Objective was 63x oil immersion lens (1.4 NA).

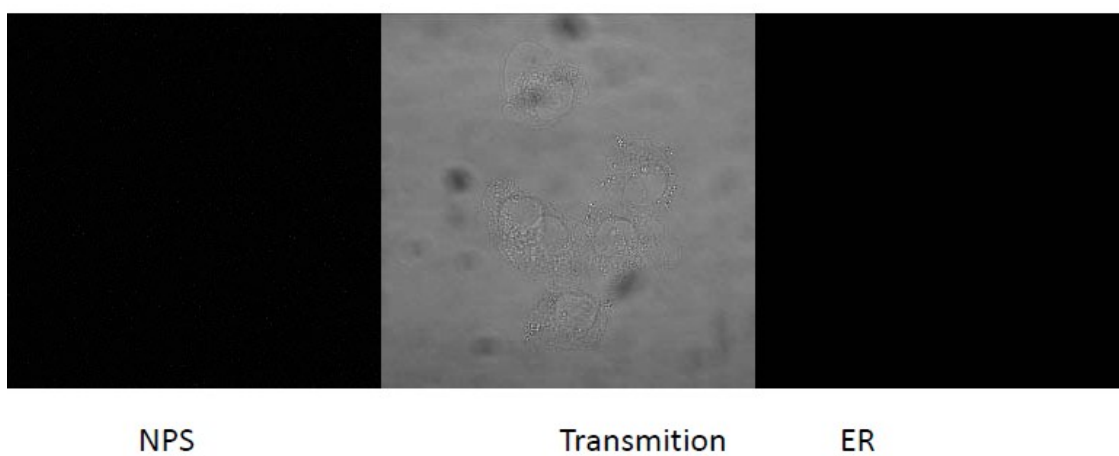

**FigureS23.** Confocal micrograph realized as control on cells without NPs and without staining.



## S12. Fluorescence correlation spectroscopy (FCS): Fitting examples

### Fitting of FCS data for ATTO550 water solution

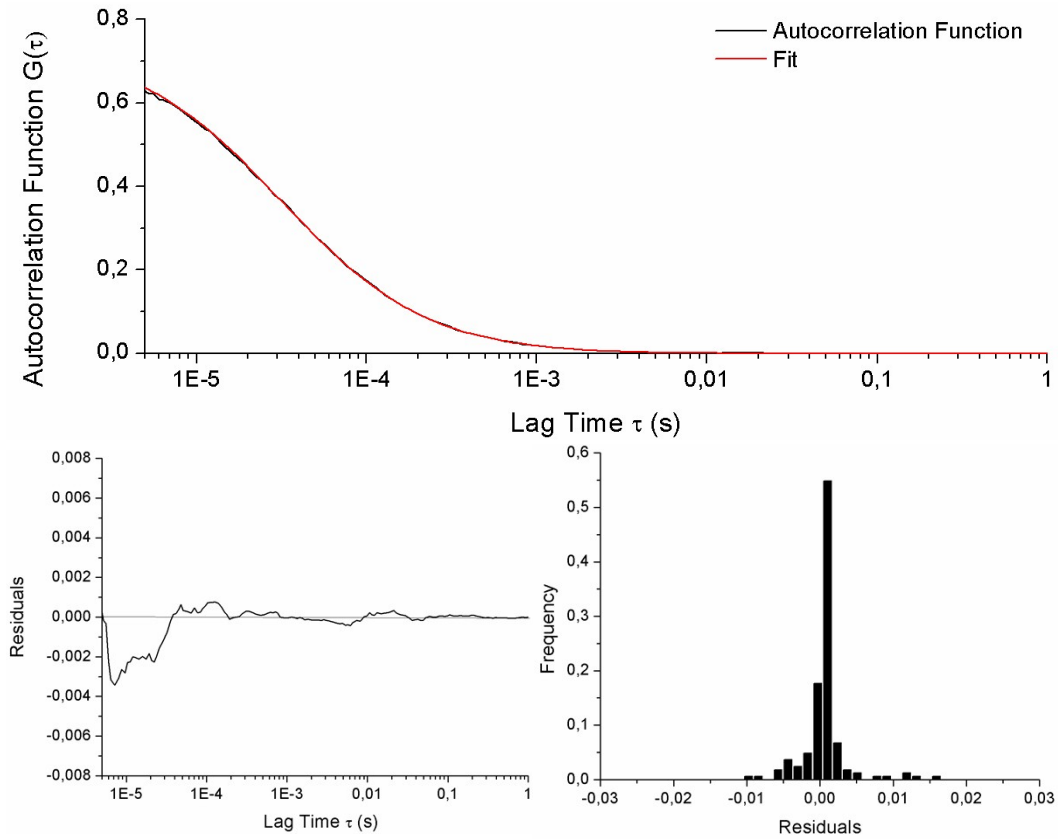

#### Model Parameters (fit results):

| Parameter                      | Value                 | Range                 | Parameter     | Value                                      | Range                                  |
|--------------------------------|-----------------------|-----------------------|---------------|--------------------------------------------|----------------------------------------|
| # non-fluorescent components = | 0                     | 0...2                 | $w_{x,y}$ =   | $229.6179 \pm 6.22$                        | nm 0... $10^4$                         |
| N = F                          | $1.35326 \pm 0.00671$ | $10^{-10}$ ... $10^5$ | $V_{eff}$ = C | $0.5285 \pm 0.0594$                        | fl 0... $10^{50}$                      |
| 1/N = C                        | $0.73896 \pm 0.00367$ | $10^{-10}$ ... $10^5$ | $C_{all}$ = C | $4.2523 \pm 0.479$                         | nM 0... $10^{50}$                      |
| $T_{D,1}$ = F                  | $31.3216 \pm 0.409$   | $\mu$ s 1... $10^5$   | $D_1$ = C     | $420.83 \pm 23.5$                          | $\mu$ m <sup>2</sup> /s 0... $10^{50}$ |
| $G_{\infty}$ = FX              | $0 \pm 0$             | -10...10              | count rate =  | $0 \pm \text{nan} \times 10^{-2147483648}$ | Hz 0... $10^{50}$                      |
| $\gamma$ = F                   | $7.8391 \pm 0.61$     | 0.01...100            | background =  | $0 \pm 0$                                  | Hz 0... $10^{50}$                      |
|                                |                       |                       | cnt/molec = C | $0 \pm \text{nan} \times 10^{-2147483648}$ | Hz 0... $10^{50}$                      |

Legend: F: fit parameter, X: fixed parameter, C: calculated parameter

#### Fit Statistics:

|                                           |                                                                              |
|-------------------------------------------|------------------------------------------------------------------------------|
| $\chi^2 = 0.00197157$                     | $\chi^2$ (weighted) = 35.6153                                                |
| $\langle E \rangle = 9.75153e-05$         | $\langle E \rangle$ (weighted) = -0.0161074                                  |
| $\sqrt{\langle E^2 \rangle} = 0.00346587$ | $\sqrt{\langle E^2 \rangle}$ (weighted) = 0.465733                           |
| NP = 3                                    | NR = 164                                                                     |
| DF = 160                                  | TSS = 10.1577                                                                |
| $R^2 = 0.999806$                          | $R^2$ (weighted) = -2.50624                                                  |
| $R^2_{adjusted} = 0.999803$               | $R^2_{adjusted}$ (weighted) = -2.54979                                       |
| AICc = -1851.77                           | AICc (weighted) = -244.293                                                   |
| BIC = -1842.62                            | BIC (weighted) = -235.143                                                    |
|                                           | $\max_P(\sigma_P/ P ) = 7.78151\%$                                           |
| $\det(\text{COV}) = 4.00533e-07$          | $p_{\text{Bayes}}(\text{model} \text{data}) = 1.71655e-15 (= 10^{-14.7653})$ |

## Fitting of FCS data for Au-MSA\* NPs water solution

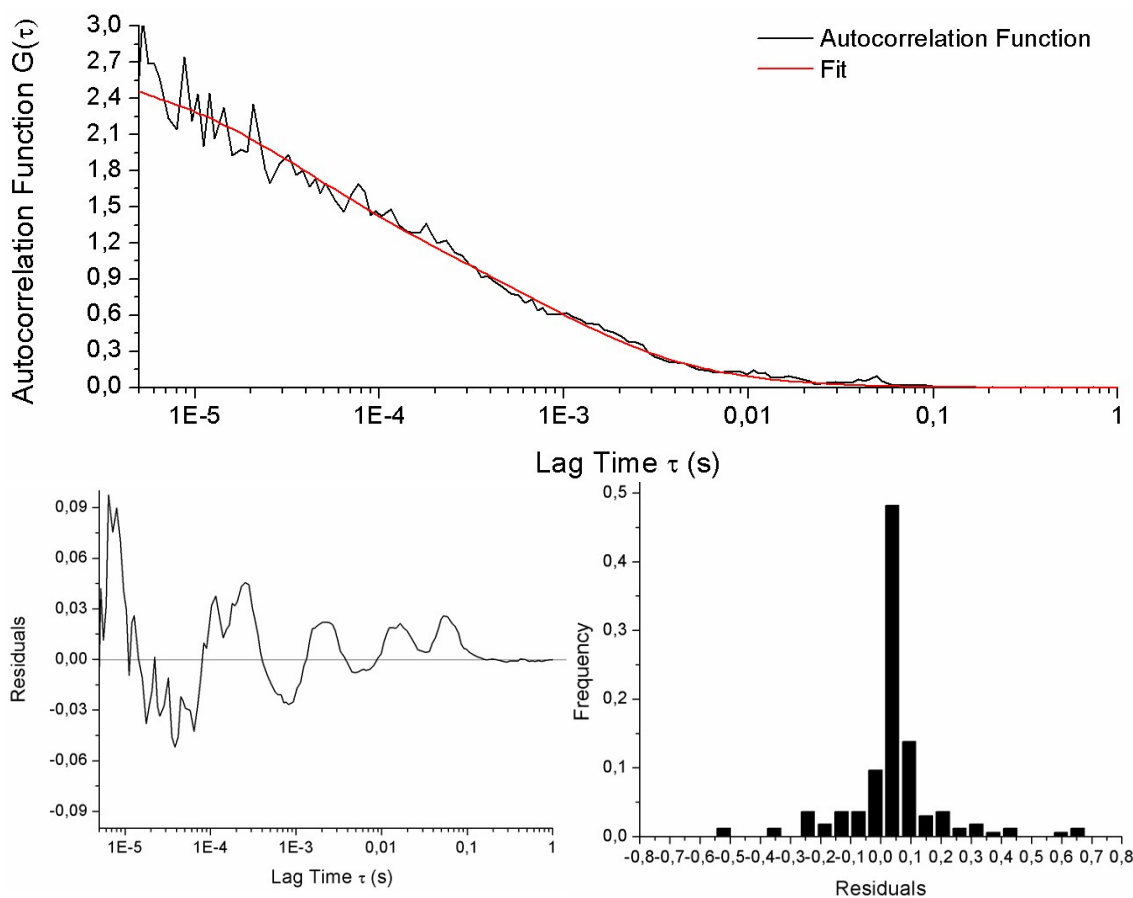

### Model Parameters (fit results):

| Parameter                      | Value               | Range                     | Parameter         | Value                                                 | Range                                   |
|--------------------------------|---------------------|---------------------------|-------------------|-------------------------------------------------------|-----------------------------------------|
| # non-fluorescent components = | 1                   | 0...2                     | $G_{\infty}$ = FX | $0 \pm 0$                                             | -10...10                                |
| $\tau_{trip}$ = FX             | $1.23 \pm 0$        | $\mu\text{s}$ 0...10      | $\gamma$ = FX     | $6.0105 \pm 1$                                        | 0.01...100                              |
| $\theta_{trip}$ = F            | $0.2952 \pm 0.104$  | 0...0.99999               | $w_{x,y}$ =       | $240.674 \pm 9.32$                                    | nm 0... $10^4$                          |
| N = F                          | $0.3806 \pm 0.0118$ | $10^{-10}$ ... $10^5$     | $V_{eff}$ = C     | $0.4666 \pm 0.0947$                                   | fl 0... $10^{50}$                       |
| $1/N$ = C                      | $2.6272 \pm 0.0814$ | $10^{-10}$ ... $10^5$     | $C_{all}$ = C     | $1.3546 \pm 0.278$                                    | nM 0... $10^{50}$                       |
| $\rho_1$ = C                   | $0.5576 \pm 0.0299$ | 0...0.99999               | $D_1$ = C         | $408.3755 \pm 31.6$                                   | $\mu\text{m}^2/\text{s}$ 0... $10^{50}$ |
| $\tau_{D,1}$ = FX              | $35.46 \pm 0$       | $\mu\text{s}$ 1... $10^5$ | $D_2$ = C         | $14.8396 \pm 1.64$                                    | $\mu\text{m}^2/\text{s}$ 0... $10^{50}$ |
| $\rho_2$ = F                   | $0.4424 \pm 0.0299$ | 0...0.99999               | count rate =      | $7.36867 \times 10^{280} \pm 2.66 \times 10^{284}$ Hz | 0... $10^{50}$                          |
| $\tau_{D,2}$ = F               | $975.8338 \pm 77.3$ | $\mu\text{s}$ 1... $10^8$ | background =      | $0 \pm 0$                                             | Hz 0... $10^{50}$                       |
|                                |                     |                           | cnt/molec = C     | $1.93593 \times 10^{281} \pm 6.99 \times 10^{284}$ Hz | 0... $10^{50}$                          |

Legend: F: fit parameter, X: fixed parameter, C: calculated parameter

### Fit Statistics:

|                                          |                                                                                       |
|------------------------------------------|---------------------------------------------------------------------------------------|
| $\chi^2 = 0.623219$                      | $\chi^2$ (weighted) = 51.1462                                                         |
| $\langle E \rangle = 0.00604155$         | $\langle E \rangle$ (weighted) = -0.0125117                                           |
| $\sqrt{\langle E^2 \rangle} = 0.0593696$ | $\sqrt{\langle E^2 \rangle}$ (weighted) = 0.54047                                     |
| NP = 7                                   | NR = 175                                                                              |
| DF = 167                                 | TSS = 94.9918                                                                         |
| $R^2 = 0.993439$                         | $R^2$ (weighted) = 0.461572                                                           |
| $R^2_{adjusted} = 0.993205$              | $R^2_{adjusted}$ (weighted) = 0.442343                                                |
| AICc = -971.917                          | AICc (weighted) = -200.597                                                            |
| BIC = -950.434                           | BIC (weighted) = -179.114                                                             |
|                                          | $\max_P(\sigma_P/ P ) = 87.5\%$                                                       |
| $\det(\text{COV}) = 4.26821\text{e-}12$  | $p_{\text{Bayes}}(\text{model} \text{data}) = 1.32742\text{e-}30$ (= $10^{-29.877}$ ) |

## Fitting of FCS data for Au-Glucosamine\* NPs water solution

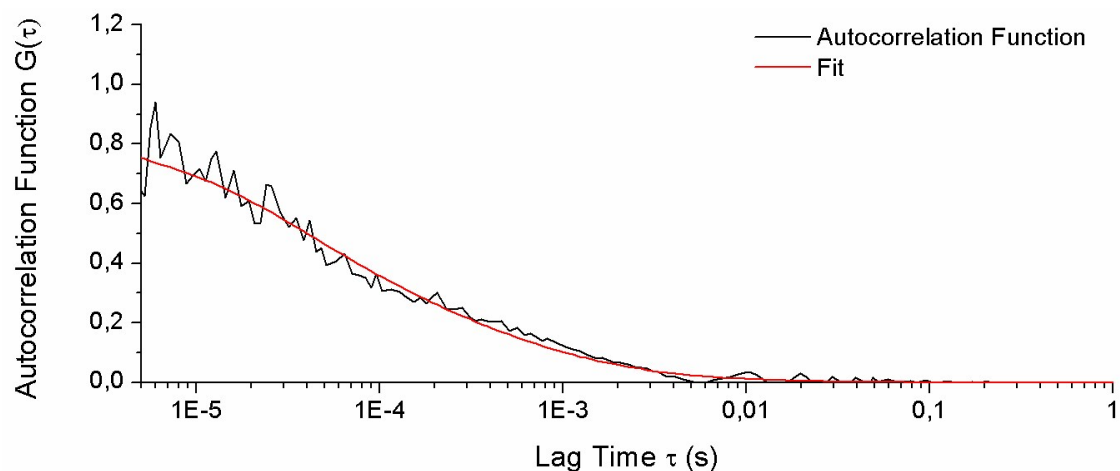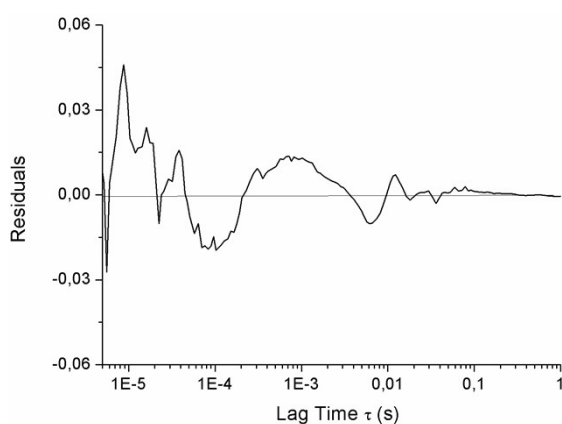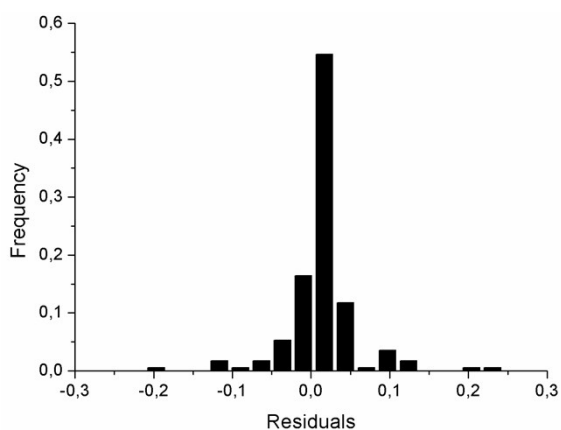

### Model Parameters (fit results):

| Parameter           | Value               | Range                       | Parameter         | Value                                  | Range                            |
|---------------------|---------------------|-----------------------------|-------------------|----------------------------------------|----------------------------------|
| # non-fluorescent = | 1                   | 0...2                       | $G_{\infty} = FX$ | $0 \pm 0$                              | -10...10                         |
| components =        | 2                   | 1...3                       | $\gamma = FX$     | $7.9 \pm 1$                            | 0.01...100                       |
| $\tau_{trip} = FX$  | $0.4 \pm 0$         | $\mu s$ 0...10              | $w_{x,y} =$       | $244 \pm 6$                            | nm 0...10 <sup>4</sup>           |
| $\theta_{trip} = F$ | $0.8286 \pm 0.0392$ | 0...0.99999                 | $V_{eff} = C$     | $0.639 \pm 0.0936$                     | fl 0...10 <sup>50</sup>          |
| $N = F$             | $1.1872 \pm 0.0864$ | $10^{-10} \dots 10^5$       | $C_{all} = C$     | $3.0849 \pm 0.505$                     | nM 0...10 <sup>50</sup>          |
| $1/N = C$           | $0.8423 \pm 0.0613$ | $10^{-10} \dots 10^5$       | $D_1 = C$         | $402.2703 \pm 19.8$                    | $\mu m^2/s$ 0...10 <sup>50</sup> |
| $\rho_1 = C$        | $0.7273 \pm 0.0871$ | 0...0.99999                 | $D_2 = C$         | $25.5532 \pm 8.13$                     | $\mu m^2/s$ 0...10 <sup>50</sup> |
| $\tau_{D,1} = FX$   | $37 \pm 0$          | $\mu s$ 1...10 <sup>5</sup> | count rate =      | $443.3933 \pm 2.04 \times 10^{236}$ Hz | 0...10 <sup>50</sup>             |
| $\rho_2 = F$        | $0.2727 \pm 0.0871$ | 0...0.99999                 | background =      | $0 \pm 0$                              | Hz 0...10 <sup>50</sup>          |
| $\tau_{D,2} = F$    | $582.4707 \pm 183$  | $\mu s$ 1...10 <sup>8</sup> | cnt/molec = C     | $373.4882 \pm 1.72 \times 10^{236}$ Hz | 0...10 <sup>50</sup>             |

Legend: **F**: fit parameter, **X**: fixed parameter, **C**: calculated parameter

### Fit Statistics:

|                                          |                                                                      |
|------------------------------------------|----------------------------------------------------------------------|
| $\chi^2 = 0.843796$                      | $\chi^2$ (weighted) = 248.023                                        |
| $\langle E \rangle = 0.00646012$         | $\langle E \rangle$ (weighted) = 0.0409328                           |
| $\sqrt{\langle E^2 \rangle} = 0.0693374$ | $\sqrt{\langle E^2 \rangle}$ (weighted) = 1.19321                    |
| NP = 4                                   | NR = 174                                                             |
| DF = 169                                 | TSS = 25.2284                                                        |
| $R^2 = 0.966554$                         | $R^2$ (weighted) = -8.83108                                          |
| $R^2_{adjusted} = 0.965964$              | $R^2_{adjusted}$ (weighted) = -9.00457                               |
| AICc = -918.992                          | AICc (weighted) = 69.9135                                            |
| BIC = -906.592                           | BIC (weighted) = 82.313                                              |
|                                          | $\max_P(\sigma_P/ P ) = 31.9399\%$                                   |
| $\det(COV) = 2.53384e-05$                | $P_{Bayes}(\text{model} \text{data}) = 4.19732e-64 (= 10^{-63.377})$ |

## Fitting of FCS data for Au-PEG5000\* NPs water solution

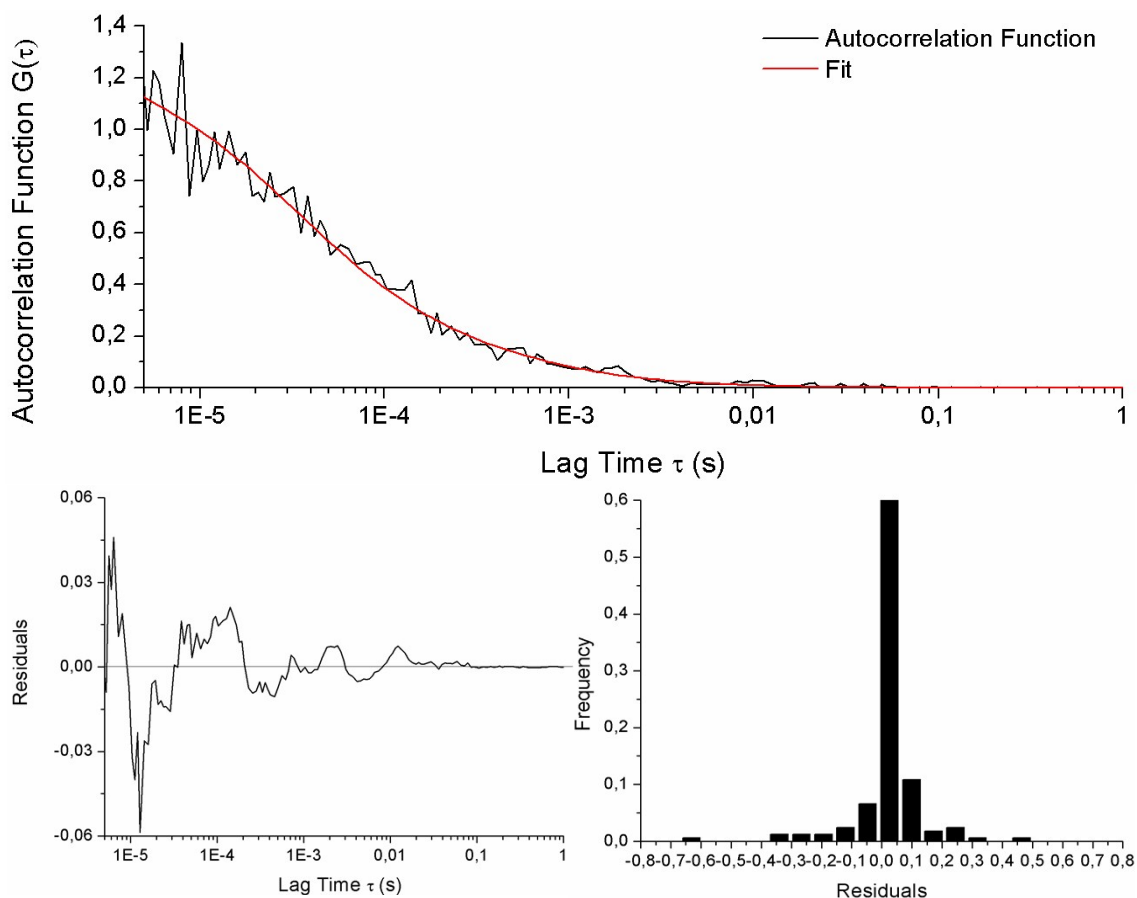

### Model Parameters (fit results):

| Parameter                      | Value               | Range                                | Parameter         | Value                                              | Range                                 |
|--------------------------------|---------------------|--------------------------------------|-------------------|----------------------------------------------------|---------------------------------------|
| # non-fluorescent components = | 1                   | 0...2                                | $G_{\infty}$ = FX | $0 \pm 0$                                          | -10...10                              |
| $\tau_{trip}$ = FX             | $1.19 \pm 0$        | $\mu\text{s } 0...10$                | $\gamma$ = FX     | $6.54 \pm 1$                                       | 0.01...100                            |
| $\theta_{trip}$ = F            | $0.4376 \pm 0.14$   | 0...0.99999                          | $w_{x,y}$ =       | $228.3 \pm 10.8$                                   | nm 0...10 <sup>4</sup>                |
| N = F                          | $0.7913 \pm 0.0523$ | 10 <sup>-10</sup> ...10 <sup>5</sup> | $V_{eff}$ = C     | $0.4333 \pm 0.0904$                                | fl 0...10 <sup>50</sup>               |
| 1/N = C                        | $1.2638 \pm 0.0836$ | 10 <sup>-10</sup> ...10 <sup>5</sup> | $C_{all}$ = C     | $3.0322 \pm 0.664$                                 | nM 0...10 <sup>50</sup>               |
| $\rho_1$ = C                   | $0.8952 \pm 0.0448$ | 0...0.99999                          | $D_1$ = C         | $394.8552 \pm 37.4$                                | $\mu\text{m}^2/\text{s } 0...10^{50}$ |
| $\tau_{D,1}$ = FX              | $33 \pm 0$          | $\mu\text{s } 1...10^5$              | $D_2$ = C         | $17.8783 \pm 9.92$                                 | $\mu\text{m}^2/\text{s } 0...10^{50}$ |
| $\rho_2$ = F                   | $0.1048 \pm 0.0448$ | 0...0.99999                          | count rate =      | $1.58629 \times 10^{224} \pm 8.69 \times 10^{306}$ | Hz 0...10 <sup>50</sup>               |
| $\tau_{D,2}$ = F               | $728.83 \pm 398$    | $\mu\text{s } 1...10^8$              | background =      | $0 \pm 0$                                          | Hz 0...10 <sup>50</sup>               |
|                                |                     |                                      | cnt/molec = C     | $2.00475 \times 10^{224} \pm 1.1 \times 10^{307}$  | Hz 0...10 <sup>50</sup>               |

Legend: F: fit parameter, X: fixed parameter, C: calculated parameter

### Fit Statistics:

|                                         |                                                                                       |
|-----------------------------------------|---------------------------------------------------------------------------------------|
| $\chi^2 = 3.12242$                      | $\chi^2$ (weighted) = 48.4896                                                         |
| $\langle E \rangle = -0.00249388$       | $\langle E \rangle$ (weighted) = -0.0153988                                           |
| $\sqrt{\langle E^2 \rangle} = 0.137126$ | $\sqrt{\langle E^2 \rangle}$ (weighted) = 0.540249                                    |
| NP = 4                                  | NR = 166                                                                              |
| DF = 161                                | TSS = 44.2743                                                                         |
| $R^2 = 0.929475$                        | $R^2$ (weighted) = -0.0952086                                                         |
| $R^2_{adjusted} = 0.928169$             | $R^2_{adjusted}$ (weighted) = -0.11549                                                |
| AICc = -651.332                         | AICc (weighted) = -196.038                                                            |
| BIC = -639.133                          | BIC (weighted) = -183.838                                                             |
|                                         | $\max_p(\sigma_p/ P ) = 54.6081\%$                                                    |
| $\det(\text{COV}) = 0.000866215$        | $p_{\text{Bayes}}(\text{model} \text{data}) = 1.02336\text{e-}20$ ( $= 10^{-19.99}$ ) |

### Fitting of FCS data for Au-Alkyl-PEG<sub>600</sub>-C<sub>4</sub>H<sub>9</sub> \* NPs water solution

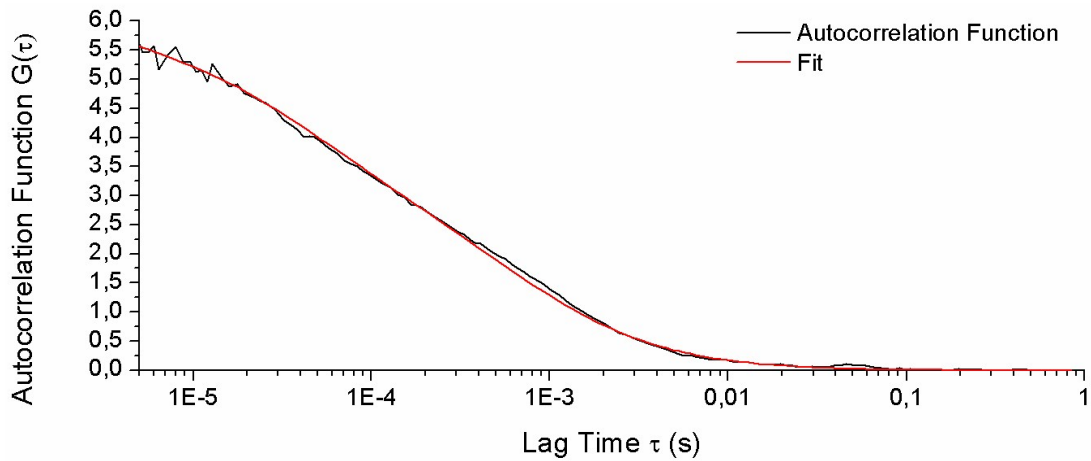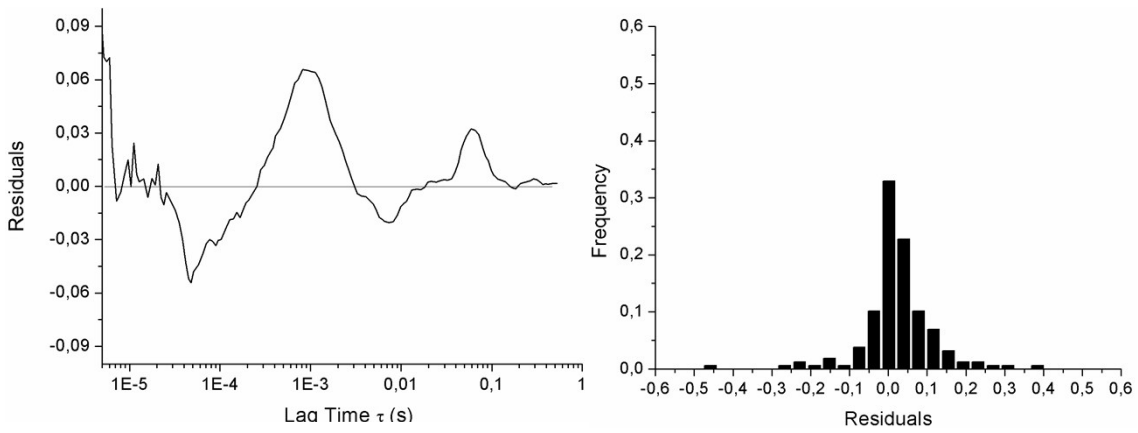

#### Model Parameters (fit results):

| Parameter                      | Value                 | Range                                | Parameter         | Value                                              | Range                            |
|--------------------------------|-----------------------|--------------------------------------|-------------------|----------------------------------------------------|----------------------------------|
| # non-fluorescent components = | 1                     | 0...2                                | $G_{\infty} = FX$ | $0 \pm 0$                                          | -10...10                         |
| $T_{trip} = FX$                | $1.57 \pm 0$          | $\mu s$ 0...10                       | $\gamma = FX$     | $7 \pm 1.35$                                       | 0.01...100                       |
| $\theta_{trip} = F$            | $0.233 \pm 0.0461$    | 0...0.99999                          | $w_{x,y} =$       | $216 \pm 10$                                       | nm 0...10 <sup>4</sup>           |
| $N = F$                        | $0.17075 \pm 0.00361$ | 10 <sup>-10</sup> ...10 <sup>5</sup> | $V_{eff} = C$     | $0.3928 \pm 0.0934$                                | fl 0...10 <sup>50</sup>          |
| $1/N = C$                      | $5.8564 \pm 0.124$    | 10 <sup>-10</sup> ...10 <sup>5</sup> | $C_{all} = C$     | $0.7218 \pm 0.172$                                 | nM 0...10 <sup>50</sup>          |
| $\rho_1 = C$                   | $0.4925 \pm 0.0425$   | 0...0.99999                          | $D_1 = C$         | $302.961 \pm 28.1$                                 | $\mu m^2/s$ 0...10 <sup>50</sup> |
| $T_{D,1} = FX$                 | $38.5 \pm 0$          | $\mu s$ 1...10 <sup>5</sup>          | $D_2 = C$         | $16.9701 \pm 2.27$                                 | $\mu m^2/s$ 0...10 <sup>50</sup> |
| $\rho_2 = F$                   | $0.5075 \pm 0.0425$   | 0...0.99999                          | count rate =      | $3.92711 \times 10^{256} \pm 2.55 \times 10^{257}$ | Hz 0...10 <sup>50</sup>          |
| $T_{D,2} = F$                  | $687.3274 \pm 66.5$   | $\mu s$ 1...10 <sup>8</sup>          | background =      | $0 \pm 0$                                          | Hz 0...10 <sup>50</sup>          |
|                                |                       |                                      | cnt/molec = C     | $2.29989 \times 10^{257} \pm 1.49 \times 10^{258}$ | Hz 0...10 <sup>50</sup>          |

legend: F: fit parameter, X: fixed parameter, C: calculated parameter

#### Fit Statistics:

|                                         |                                                                      |
|-----------------------------------------|----------------------------------------------------------------------|
| $\chi^2 = 1.59387$                      | $\chi^2$ (weighted) = 25.3303                                        |
| $\langle E \rangle = 0.00822654$        | $\langle E \rangle$ (weighted) = 0.0824572                           |
| $\sqrt{\langle E^2 \rangle} = 0.100101$ | $\sqrt{\langle E^2 \rangle}$ (weighted) = 0.391815                   |
| NP = 4                                  | NR = 158                                                             |
| DF = 153                                | TSS = 843.903                                                        |
| $R^2 = 0.998111$                        | $R^2$ (weighted) = 0.969984                                          |
| $R^2_{adjusted} = 0.998075$             | $R^2_{adjusted}$ (weighted) = 0.9694                                 |
| AICc = -717.974                         | AICc (weighted) = -280.972                                           |
| BIC = -705.985                          | BIC (weighted) = -268.983                                            |
|                                         | max <sub>p</sub> ( $\sigma_p/ P $ ) = 19.7854%                       |
| det(COV) = 1.03072e-08                  | $p_{Bayes}(\text{model} \text{data}) = 1.04948e-15 (= 10^{-14.979})$ |

## Fitting of FCS data for FBS labelled proteins in RPMI solution

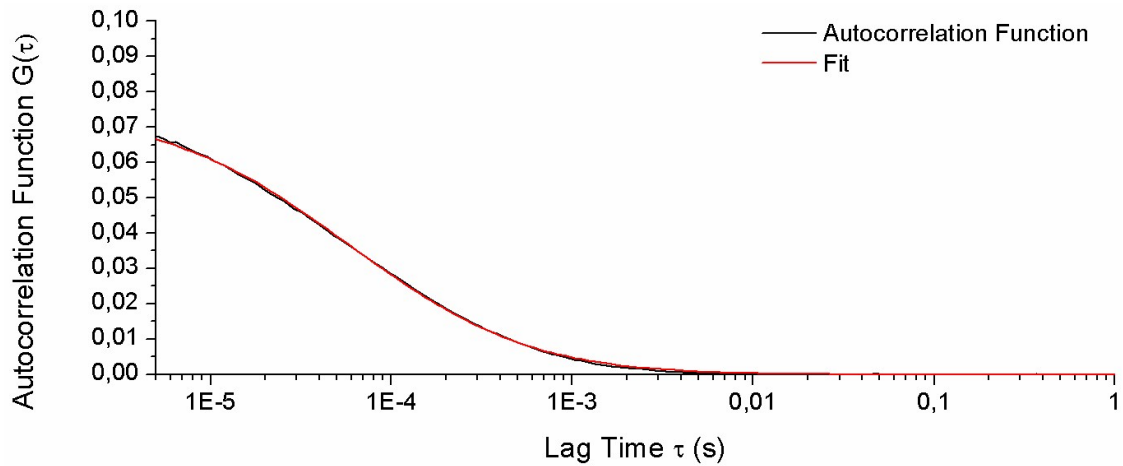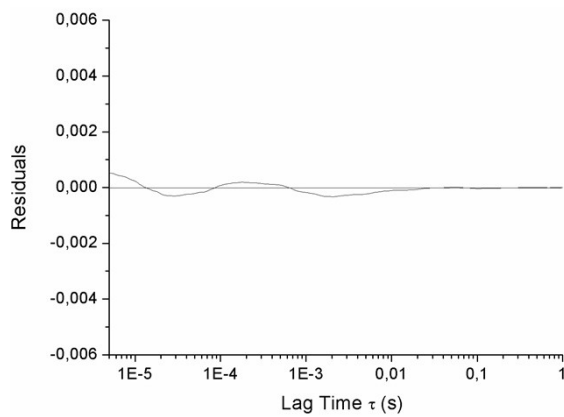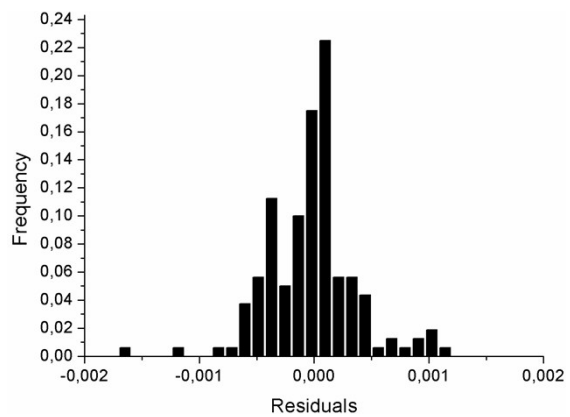

### Model Parameters (fit results):

| Parameter           | Value                             | Range                                | Parameter         | Value               | Range                            |
|---------------------|-----------------------------------|--------------------------------------|-------------------|---------------------|----------------------------------|
| # non-fluorescent = | 1                                 | 0...2                                | $G_{\infty}$ = FX | $0 \pm 0$           | -10...10                         |
| components =        | 2                                 | 1...3                                | $\gamma$ = FX     | $7.83 \pm 0.61$     | 0.01...100                       |
| $T_{trip}$ = FX     | $1.35 \pm 0$                      | $\mu s$ 0...10                       | $w_{xy}$ =        | $229.62 \pm 6.22$   | nm 0...10 <sup>4</sup>           |
| $\theta_{trip}$ = F | $0.2075 \pm 0.0221$               | 0...0.99999                          | $V_{eff}$ = C     | $0.5279 \pm 0.0594$ | fl 0...10 <sup>50</sup>          |
| N = F               | $13.6717 \pm 0.0555$              | 10 <sup>-10</sup> ...10 <sup>5</sup> | $C_{all}$ = C     | $43.0086 \pm 4.84$  | nM 0...10 <sup>50</sup>          |
| 1/N = C             | $0.07314 \pm 2.97 \times 10^{-4}$ | 10 <sup>-10</sup> ...10 <sup>5</sup> | $D_1$ = C         | $420.86 \pm 22.8$   | $\mu m^2/s$ 0...10 <sup>50</sup> |
| $\rho_1$ = C        | $0.573 \pm 0.0162$                | 0...0.99999                          | $D_2$ = C         | $90.2933 \pm 6.02$  | $\mu m^2/s$ 0...10 <sup>50</sup> |
| $T_{D,1}$ = FX      | $31.32 \pm 0$                     | $\mu s$ 1...10 <sup>5</sup>          | count rate =      | $460.392 \pm 620$   | Hz 0...10 <sup>50</sup>          |
| $\rho_2$ = F        | $0.427 \pm 0.0162$                | 0...0.99999                          | background =      | $0 \pm 0$           | Hz 0...10 <sup>50</sup>          |
| $T_{D,2}$ = F       | $145.9835 \pm 5.68$               | $\mu s$ 1...10 <sup>8</sup>          | cnt/molec = C     | $33.6749 \pm 45.3$  | Hz 0...10 <sup>50</sup>          |

Legend: F: fit parameter, X: fixed parameter, C: calculated parameter

### Fit Statistics:

|                                           |                                                                              |
|-------------------------------------------|------------------------------------------------------------------------------|
| $\chi^2 = 2.59463e-05$                    | $\chi^2$ (weighted) = 141.109                                                |
| $\langle E \rangle = -7.40499e-05$        | $\langle E \rangle$ (weighted) = -0.302123                                   |
| $\sqrt{\langle E^2 \rangle} = 0.00039583$ | $\sqrt{\langle E^2 \rangle}$ (weighted) = 0.889187                           |
| NP = 4                                    | NR = 160                                                                     |
| DF = 155                                  | TSS = 0.105447                                                               |
| $R^2 = 0.999754$                          | $R^2$ (weighted) = -1337.2                                                   |
| $R^2_{adjusted} = 0.999749$               | $R^2_{adjusted}$ (weighted) = -1362.94                                       |
| AICc = -2493.29                           | AICc (weighted) = -11.8443                                                   |
| BIC = -2481.24                            | BIC (weighted) = 0.198333                                                    |
|                                           | $\max_P(\sigma_P/ P ) = 10.6506\%$                                           |
| $\det(\text{COV}) = 7.06359e-11$          | $p_{\text{Bayes}}(\text{model} \text{data}) = 2.62982e-41 (= 10^{-40.5801})$ |



## Fitting of FCS data for Au-PEG<sub>5000</sub>\* NPs in living cells

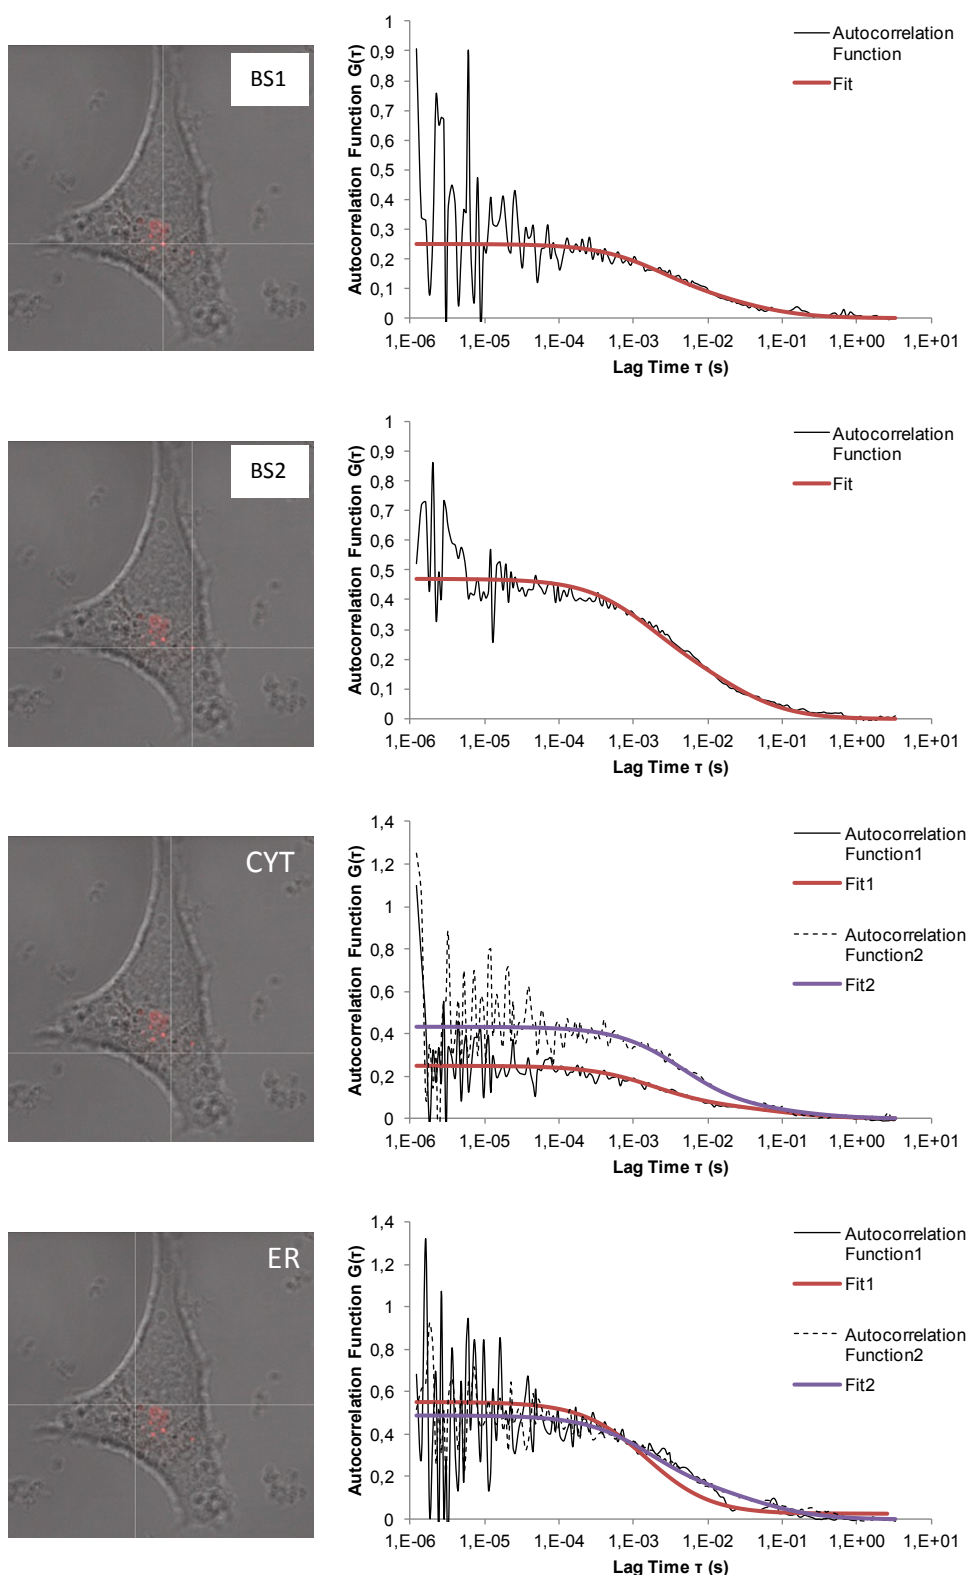

**Figure S24** Confocal micrographs of A549 cell treated by Au-PEG<sub>5000</sub>\* NPs for 30 min and the correlograms related to the marked spot. For each spot 20 tracks were recorded, screened for the diffusion time and grouped according to the class of diffusion times they belonged to. The average of those tracks were fit and the fit data are reported below. Fit were done by QuickFit 3.0 by a 3D Normal Diffusion model with two diffusing components. In the statistical distributions in Fig. 8 and 9 were included only the components with fraction  $p > 0.5$ .

## BS1 fit data

### Model Parameters (fit results):

| Parameter                | Value                          | Range                                | Parameter                   | Value               | Range                                         |
|--------------------------|--------------------------------|--------------------------------------|-----------------------------|---------------------|-----------------------------------------------|
| # non-fluorescent =      | 0                              | 0...2                                | $\gamma = \text{FX}$        | $7 \pm 0.6$         | 0.01...100                                    |
| components =             | 2                              | 1...3                                | $w_{x,y}$                   | $273.275 \pm 8.5$   | nm 0...10 <sup>4</sup>                        |
| N = F                    | $4.0213 \pm 0.171$             | 10 <sup>-10</sup> ...10 <sup>5</sup> | $V_{\text{eff}} = \text{C}$ | $0.7955 \pm 0.101$  | fl 0...10 <sup>50</sup>                       |
| 1/N = C                  | $0.2487 \pm 0.0106$            | 10 <sup>-10</sup> ...10 <sup>5</sup> | $C_{\text{all}} = \text{C}$ | $8.3945 \pm 1.12$   | nM 0...10 <sup>50</sup>                       |
| $\rho_1 = \text{C}$      | $0.3013 \pm 0.052$             | 0...0.99999                          | $D_1 = \text{C}$            | $0.4922 \pm 0.0886$ | $\mu\text{m}^2/\text{s}$ 0...10 <sup>50</sup> |
| $T_{D,1} = \text{F}$     | $3.79328 \times 10^4 \pm 6410$ | $\mu\text{s}$ 1...10 <sup>5</sup>    | $D_2 = \text{C}$            | $8.4528 \pm 2.63$   | $\mu\text{m}^2/\text{s}$ 0...10 <sup>50</sup> |
| $\rho_2 = \text{F}$      | $0.6987 \pm 0.052$             | 0...0.99999                          | count rate =                | $1 \pm 0$           | Hz 0...10 <sup>50</sup>                       |
| $T_{D,2} = \text{F}$     | $2208.716 \pm 675$             | $\mu\text{s}$ 1...10 <sup>8</sup>    | background =                | $0 \pm 0$           | Hz 0...10 <sup>50</sup>                       |
| $G_{\infty} = \text{FX}$ | $0 \pm 0$                      | -10...10                             | cnt/molec = C               | $0.2487 \pm 0.0106$ | Hz 0...10 <sup>50</sup>                       |

*legend: F: fit parameter, X: fixed parameter, C: calculated parameter*

### Fit Result Message:

**levmar** returned after 3000 iterations.  
reason: stopped by maximum iterations. SES = 3597.49 [old\_SES = 3648.2]

### Fit Statistics:

$$\chi^2 = 2.28852 \quad \chi^2 (\text{weighted}) = 3597.6$$

## BS2 fit data

### Model Parameters (fit results):

| Parameter                | Value                       | Range                                | Parameter                   | Value                                                            | Range                                         |
|--------------------------|-----------------------------|--------------------------------------|-----------------------------|------------------------------------------------------------------|-----------------------------------------------|
| # non-fluorescent =      | 0                           | 0...2                                | $\gamma = \text{FX}$        | $7 \pm 0.6$                                                      | 0.01...100                                    |
| components =             | 2                           | 1...3                                | $w_{x,y}$                   | $273.275 \pm 8.5$                                                | nm 0...10 <sup>4</sup>                        |
| N = F                    | $2.1237 \pm 0$              | 10 <sup>-10</sup> ...10 <sup>5</sup> | $V_{\text{eff}} = \text{C}$ | $0.7955 \pm 0.101$                                               | fl 0...10 <sup>50</sup>                       |
| 1/N = C                  | $0.47088 \pm 0$             | 10 <sup>-10</sup> ...10 <sup>5</sup> | $C_{\text{all}} = \text{C}$ | $4.4332 \pm 0.562$                                               | nM 0...10 <sup>50</sup>                       |
| $\rho_1 = \text{C}$      | $0.6076 \pm 0$              | 0...0.99999                          | $D_1 = \text{C}$            | $12.4294 \pm 0.773$                                              | $\mu\text{m}^2/\text{s}$ 0...10 <sup>50</sup> |
| $T_{D,1} = \text{F}$     | $1502.0719 \pm 0$           | $\mu\text{s}$ 1...10 <sup>5</sup>    | $D_2 = \text{C}$            | $0.779 \pm 0.0485$                                               | $\mu\text{m}^2/\text{s}$ 0...10 <sup>50</sup> |
| $\rho_2 = \text{F}$      | $0.3924 \pm 0$              | 0...0.99999                          | count rate =                | $1.36002 \times 10^{272} \pm \text{nan} \times 10^{-2147483648}$ | Hz 0...10 <sup>50</sup>                       |
| $T_{D,2} = \text{F}$     | $2.39669 \times 10^4 \pm 0$ | $\mu\text{s}$ 1...10 <sup>8</sup>    | background =                | $0 \pm 0$                                                        | Hz 0...10 <sup>50</sup>                       |
| $G_{\infty} = \text{FX}$ | $0 \pm 0$                   | -10...10                             | cnt/molec = C               | $6.404 \times 10^{271} \pm \text{nan} \times 10^{-2147483648}$   | Hz 0...10 <sup>50</sup>                       |

*legend: F: fit parameter, X: fixed parameter, C: calculated parameter*

### Fit Result Message:

**SimAneal** returned after 1000 iterations and 4001  $\chi^2$ -function evaluations.  
reason: stopped by abortion criterion  $f_{\text{max}}$ . SES = 24.2416 [old\_SES = 24.2416]

### Fit Statistics:

$$\chi^2 = 0.648429 \quad \chi^2 (\text{weighted}) = 24.2416$$



## Cytoplasm autocorrelation function 1 fit data

### Model Parameters (fit results):

| Parameter           | Value                       | Range                             | Parameter     | Value                        | Range                                         |
|---------------------|-----------------------------|-----------------------------------|---------------|------------------------------|-----------------------------------------------|
| # non-fluorescent = | 0                           | 0...2                             | $\gamma = FX$ | $7 \pm 0.6$                  | 0.01...100                                    |
| components =        | 2                           | 1...3                             | $w_{x,y} =$   | $273.275 \pm 8.5$            | nm 0...10 <sup>4</sup>                        |
| N = F               | $4.05128 \pm 0$             | $10^{-10} \dots 10^5$             | $V_{eff} = C$ | $0.7955 \pm 0.101$           | fl 0...10 <sup>50</sup>                       |
| 1/N = C             | $0.24684 \pm 0$             | $10^{-10} \dots 10^5$             | $C_{all} = C$ | $8.457 \pm 1.07$             | nM 0...10 <sup>50</sup>                       |
| $\rho_1 = C$        | $0.23171 \pm 0$             | 0...0.99999                       | $D_1 = C$     | $0.1867 \pm 0.0116$          | $\mu\text{m}^2/\text{s}$ 0...10 <sup>50</sup> |
| $\tau_{D,1} = F$    | $9.99949 \times 10^4 \pm 0$ | $\mu\text{s}$ 1...10 <sup>5</sup> | $D_2 = C$     | $9.8926 \pm 0.615$           | $\mu\text{m}^2/\text{s}$ 0...10 <sup>50</sup> |
| $\rho_2 = F$        | $0.76829 \pm 0$             | 0...0.99999                       | count rate =  | $0 \pm 7.21 \times 10^{307}$ | Hz 0...10 <sup>50</sup>                       |
| $\tau_{D,2} = F$    | $1887.24873 \pm 0$          | $\mu\text{s}$ 1...10 <sup>8</sup> | background =  | $0 \pm 0$                    | Hz 0...10 <sup>50</sup>                       |
| $G_{\infty} = FX$   | $0 \pm 0$                   | -10...10                          | cnt/molec = C | $0 \pm 1.78 \times 10^{307}$ | Hz 0...10 <sup>50</sup>                       |

*legend: F: fit parameter, X: fixed parameter, C: calculated parameter*

### Fit Result Message:

SimAneal returned after 1000 iterations and 4001  $\chi^2$ -function evaluations.  
reason: stopped by abortion criterion  $f_{max}$ . SES = 143.037 [old\_SES = 143.037]

### Fit Statistics:

$$\chi^2 = 1.63604 \quad \chi^2 \text{ (weighted)} = 143.037$$

## Cytoplasm autocorrelation function 2 fit data

### Model Parameters (fit results):

| Parameter           | Value                       | Range                             | Parameter     | Value                                              | Range                                         |
|---------------------|-----------------------------|-----------------------------------|---------------|----------------------------------------------------|-----------------------------------------------|
| # non-fluorescent = | 0                           | 0...2                             | $\gamma = FX$ | $7 \pm 0.6$                                        | 0.01...100                                    |
| components =        | 2                           | 1...3                             | $w_{x,y} =$   | $273.275 \pm 8.5$                                  | nm 0...10 <sup>4</sup>                        |
| N = F               | $2.31763 \pm 0$             | $10^{-10} \dots 10^5$             | $V_{eff} = C$ | $0.7955 \pm 0.101$                                 | fl 0...10 <sup>50</sup>                       |
| 1/N = C             | $0.43148 \pm 0$             | $10^{-10} \dots 10^5$             | $C_{all} = C$ | $4.838 \pm 0.613$                                  | nM 0...10 <sup>50</sup>                       |
| $\rho_1 = C$        | $0.89446 \pm 0$             | 0...0.99999                       | $D_1 = C$     | $4.1267 \pm 0.257$                                 | $\mu\text{m}^2/\text{s}$ 0...10 <sup>50</sup> |
| $\tau_{D,1} = F$    | $4524.09614 \pm 0$          | $\mu\text{s}$ 1...10 <sup>5</sup> | $D_2 = C$     | $0.08557 \pm 0.00532$                              | $\mu\text{m}^2/\text{s}$ 0...10 <sup>50</sup> |
| $\rho_2 = F$        | $0.10554 \pm 0$             | 0...0.99999                       | count rate =  | $4.97989 \times 10^{297} \pm 6.06 \times 10^{304}$ | Hz 0...10 <sup>50</sup>                       |
| $\tau_{D,2} = F$    | $2.18186 \times 10^5 \pm 0$ | $\mu\text{s}$ 1...10 <sup>8</sup> | background =  | $0 \pm 0$                                          | Hz 0...10 <sup>50</sup>                       |
| $G_{\infty} = FX$   | $0 \pm 0$                   | -10...10                          | cnt/molec = C | $2.1487 \times 10^{297} \pm 2.61 \times 10^{304}$  | Hz 0...10 <sup>50</sup>                       |

*legend: F: fit parameter, X: fixed parameter, C: calculated parameter*

### Fit Result Message:

SimAneal returned after 5000 iterations and 20001  $\chi^2$ -function evaluations.  
reason: stopped by abortion criterion  $f_{max}$ . SES = 3382.87 [old\_SES = 3382.87]

### Fit Statistics:

$$\chi^2 = 2.91795 \quad \chi^2 \text{ (weighted)} = 3382.87$$

## Endoplasmatic Reticulum autocorrelation function 1 fit data

### Model Parameters (fit results):

| Parameter           | Value                                         | Range                                | Parameter     | Value                                              | Range                                         |
|---------------------|-----------------------------------------------|--------------------------------------|---------------|----------------------------------------------------|-----------------------------------------------|
| # non-fluorescent = | 0                                             | 0...2                                | $\gamma = FX$ | $7 \pm 0.6$                                        | 0.01...100                                    |
| components =        | 2                                             | 1...3                                | $w_{x,y} =$   | $273.275 \pm 8.5$                                  | nm 0...10 <sup>4</sup>                        |
| N = F               | $1.825 \pm 0.0719$                            | 10 <sup>-10</sup> ...10 <sup>5</sup> | $V_{eff} = C$ | $0.7955 \pm 0.101$                                 | fl 0...10 <sup>50</sup>                       |
| 1/N = C             | $0.5479 \pm 0.0216$                           | 10 <sup>-10</sup> ...10 <sup>5</sup> | $C_{all} = C$ | $3.8098 \pm 0.506$                                 | nM 0...10 <sup>50</sup>                       |
| $\rho_1 = C$        | $0.9491 \pm 0.0954$                           | 0...0.99999                          | $D_1 = C$     | $12.5853 \pm 2.88$                                 | $\mu\text{m}^2/\text{s}$ 0...10 <sup>50</sup> |
| $\tau_{D,1} = F$    | $1483.4557 \pm 327$                           | $\mu\text{s}$ 1...10 <sup>5</sup>    | $D_2 = C$     | $2 \times 10^{-4} \pm 1.45$                        | $\mu\text{m}^2/\text{s}$ 0...10 <sup>50</sup> |
| $\rho_2 = F$        | $0.0509 \pm 0.0954$                           | 0...0.99999                          | count rate =  | $1.12986 \times 10^{299} \pm 3.59 \times 10^{305}$ | Hz 0...10 <sup>50</sup>                       |
| $\tau_{D,2} = F$    | $9.99999 \times 10^7 \pm 7.74 \times 10^{11}$ | $\mu\text{s}$ 1...10 <sup>8</sup>    | background =  | 0 $\pm$ 0                                          | Hz 0...10 <sup>50</sup>                       |
| $G_{\infty} = FX$   | 0 $\pm$ 0                                     | -10...10                             | cnt/molec = C | $6.19087 \times 10^{298} \pm 1.97 \times 10^{305}$ | Hz 0...10 <sup>50</sup>                       |

Legend: F: fit parameter, X: fixed parameter, C: calculated parameter

### Fit Result Message:

levmar returned after 3000 iterations.  
reason: stopped by maximum iterations. SES = 63987.3 [old\_SES = 64088.1]

### Fit Statistics:

$$\chi^2 = 4.37373 \quad \chi^2 \text{ (weighted)} = 78790.8$$

## Endoplasmatic Reticulum autocorrelation function 2 fit data

### Model Parameters (fit results):

| Parameter           | Value                                      | Range                                | Parameter     | Value                             | Range                                         |
|---------------------|--------------------------------------------|--------------------------------------|---------------|-----------------------------------|-----------------------------------------------|
| # non-fluorescent = | 0                                          | 0...2                                | $\gamma = FX$ | $7 \pm 0.6$                       | 0.01...100                                    |
| components =        | 2                                          | 1...3                                | $w_{x,y} =$   | $273.275 \pm 8.5$                 | nm 0...10 <sup>4</sup>                        |
| N = F               | $2.0538 \pm 0.0623$                        | 10 <sup>-10</sup> ...10 <sup>5</sup> | $V_{eff} = C$ | $0.7955 \pm 0.101$                | fl 0...10 <sup>50</sup>                       |
| 1/N = C             | $0.4869 \pm 0.0148$                        | 10 <sup>-10</sup> ...10 <sup>5</sup> | $C_{all} = C$ | $4.2874 \pm 0.559$                | nM 0...10 <sup>50</sup>                       |
| $\rho_1 = C$        | $0.7096 \pm 0.0414$                        | 0...0.99999                          | $D_1 = C$     | $11.4275 \pm 2.94$                | $\mu\text{m}^2/\text{s}$ 0...10 <sup>50</sup> |
| $\tau_{D,1} = F$    | $1633.7671 \pm 408$                        | $\mu\text{s}$ 1...10 <sup>5</sup>    | $D_2 = C$     | $0.3491 \pm 0.0759$               | $\mu\text{m}^2/\text{s}$ 0...10 <sup>50</sup> |
| $\rho_2 = F$        | $0.2904 \pm 0.0414$                        | 0...0.99999                          | count rate =  | $1 \pm 2.11 \times 10^{306}$      | Hz 0...10 <sup>50</sup>                       |
| $\tau_{D,2} = F$    | $5.34802 \times 10^4 \pm 1.11 \times 10^4$ | $\mu\text{s}$ 1...10 <sup>8</sup>    | background =  | 0 $\pm$ 0                         | Hz 0...10 <sup>50</sup>                       |
| $G_{\infty} = FX$   | 0 $\pm$ 0                                  | -10...10                             | cnt/molec = C | $0.4869 \pm 1.03 \times 10^{306}$ | Hz 0...10 <sup>50</sup>                       |

Legend: F: fit parameter, X: fixed parameter, C: calculated parameter

### Fit Result Message:

levmar returned after 85 iterations.  
reason: stopped by small  $\delta_p$ . SES = 34.3491 [old\_SES = 34.3491]

### Fit Statistics:

$$\chi^2 = 0.957503 \quad \chi^2 \text{ (weighted)} = 34.3491$$

## Fitting of FCS data for Au-Glucosamine\* NPs in living cells

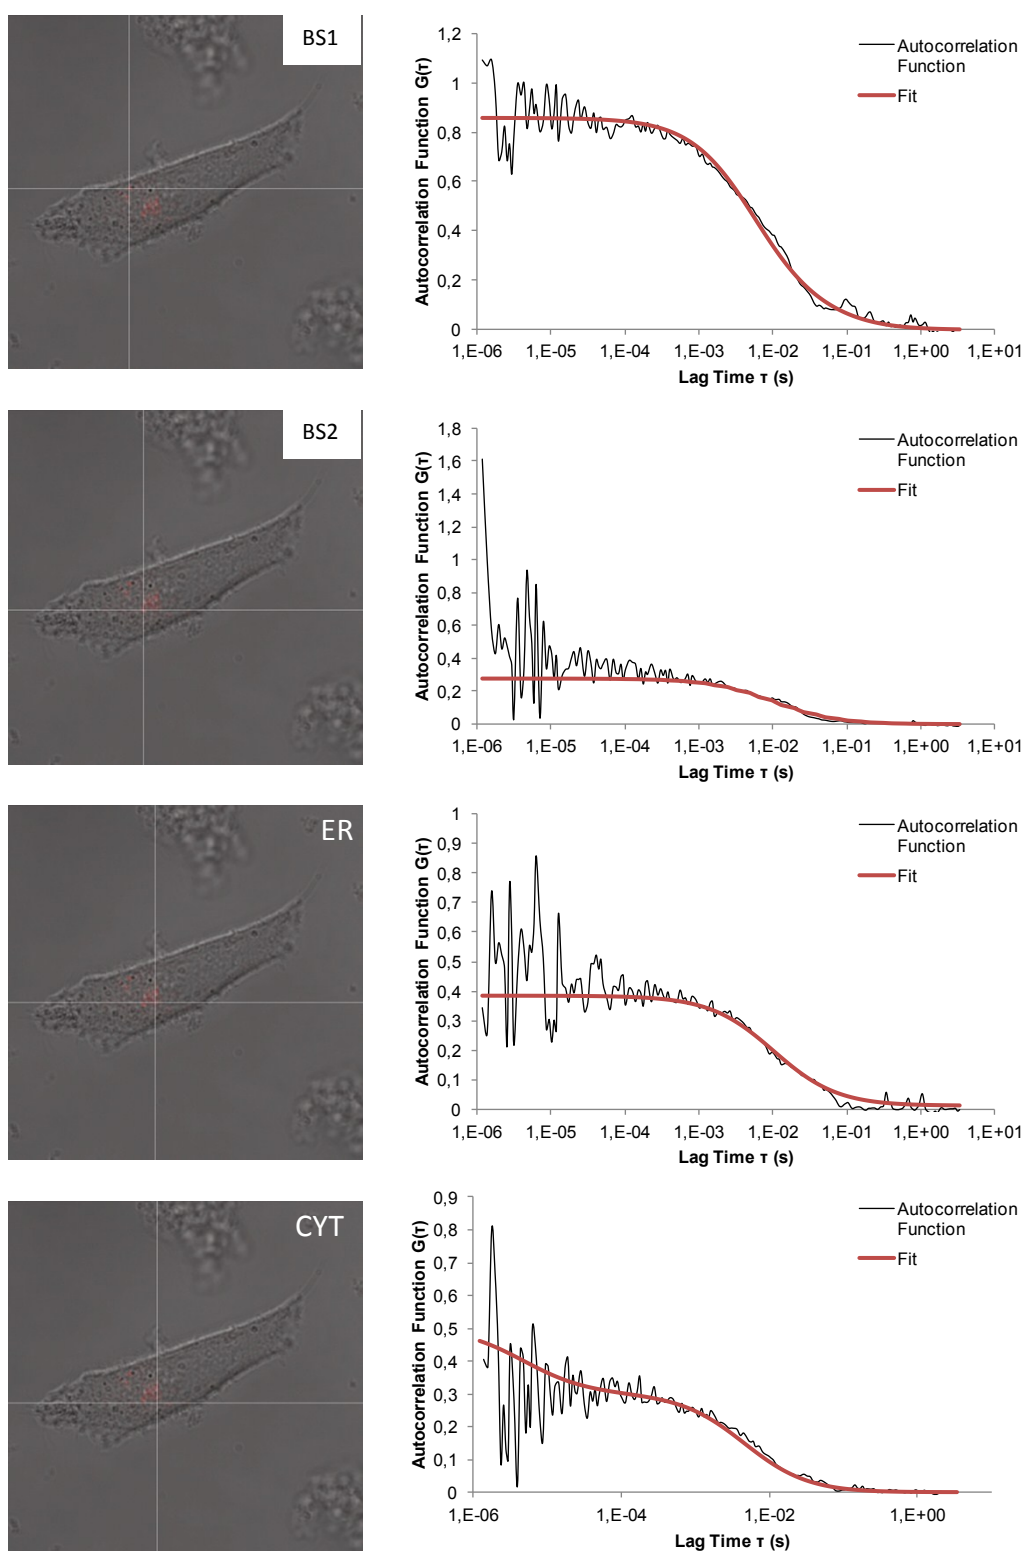

**Figure S25** Confocal micrographs of A549 cell treated by Au-Glucosamine\* NPs for 30 min and the correlograms related to the marked spot. For each spot 20 tracks were recorded, screened for the diffusion time and grouped according to the class of diffusion times they belonged to. The average of those tracks were fit and the fit data are reported below. Fit were done by QuickFit 3.0 by a 3D Normal Diffusion model with two diffusing components. In the statistical distributions in Fig. 8 and 9 were included only the components with fraction  $p > 0.5$ .

## BS1 fitting data

### Model Parameters (fit results):

| Parameter           | Value                                      | Range                             | Parameter            | Value                                              | Range                                         |
|---------------------|--------------------------------------------|-----------------------------------|----------------------|----------------------------------------------------|-----------------------------------------------|
| # non-fluorescent = | 0                                          | 0...2                             | $\gamma =$ FX        | $7 \pm 0$                                          | 0.01...100                                    |
| components =        | 2                                          | 1...3                             | $w_{x,y} =$          | $286.451 \pm 0$                                    | nm 0...10 <sup>4</sup>                        |
| N = F               | $1.1635 \pm 0.0277$                        | $10^{-10} \dots 10^5$             | $V_{\text{eff}} =$ C | $0.91617 \pm 0$                                    | fl 0...10 <sup>50</sup>                       |
| 1/N = C             | $0.8595 \pm 0.0204$                        | $10^{-10} \dots 10^5$             | $C_{\text{all}} =$ C | $2.1089 \pm 0.0501$                                | nM 0...10 <sup>50</sup>                       |
| $\rho_1 =$ C        | $0.9164 \pm 0.144$                         | 0...0.99999                       | $D_1 =$ C            | $3.6547 \pm 1.29$                                  | $\mu\text{m}^2/\text{s}$ 0...10 <sup>50</sup> |
| $T_{D,1} =$ F       | $5612.9739 \pm 1980$                       | $\mu\text{s}$ 1...10 <sup>5</sup> | $D_2 =$ C            | $0.2693 \pm 0.473$                                 | $\mu\text{m}^2/\text{s}$ 0...10 <sup>50</sup> |
| $\rho_2 =$ F        | $0.0836 \pm 0.144$                         | 0...0.99999                       | count rate =         | $2.80158 \times 10^{270} \pm 1.09 \times 10^{308}$ | Hz 0...10 <sup>50</sup>                       |
| $T_{D,2} =$ F       | $7.61829 \times 10^4 \pm 1.34 \times 10^5$ | $\mu\text{s}$ 1...10 <sup>8</sup> | background =         | 0 $\pm$ 0                                          | Hz 0...10 <sup>50</sup>                       |
| $G_{\infty} =$ FX   | 0 $\pm$ 0                                  | -10...10                          | cnt/molec = C        | $2.40783 \times 10^{270} \pm 9.37 \times 10^{307}$ | Hz 0...10 <sup>50</sup>                       |

legend: F: fit parameter, X: fixed parameter, C: calculated parameter

### Fit Result Message:

converged (the relative error in the sum of squares is at most tol)

### Fit Statistics:

$$\chi^2 = 0.561714 \quad \chi^2 \text{ (weighted)} = 62.4569$$

## BS2 fitting data

### Model Parameters (fit results):

| Parameter           | Value                                     | Range                             | Parameter            | Value                                              | Range                                         |
|---------------------|-------------------------------------------|-----------------------------------|----------------------|----------------------------------------------------|-----------------------------------------------|
| # non-fluorescent = | 0                                         | 0...2                             | $\gamma =$ FX        | $7 \pm 0$                                          | 0.01...100                                    |
| components =        | 2                                         | 1...3                             | $w_{x,y} =$          | $286.451 \pm 0$                                    | nm 0...10 <sup>4</sup>                        |
| N = F               | $3.6218 \pm 0.0702$                       | $10^{-10} \dots 10^5$             | $V_{\text{eff}} =$ C | $0.91617 \pm 0$                                    | fl 0...10 <sup>50</sup>                       |
| 1/N = C             | $0.27611 \pm 0.00535$                     | $10^{-10} \dots 10^5$             | $C_{\text{all}} =$ C | $6.5644 \pm 0.127$                                 | nM 0...10 <sup>50</sup>                       |
| $\rho_1 =$ C        | $1 \pm 0.169$                             | 0...0.99999                       | $D_1 =$ C            | $2.817 \pm 1.49$                                   | $\mu\text{m}^2/\text{s}$ 0...10 <sup>50</sup> |
| $T_{D,1} =$ F       | $7282.0566 \pm 3840$                      | $\mu\text{s}$ 1...10 <sup>5</sup> | $D_2 =$ C            | $3.9 \times 10^{-4} \pm 0.00129$                   | $\mu\text{m}^2/\text{s}$ 0...10 <sup>50</sup> |
| $\rho_2 =$ F        | 0 $\pm$ 0.169                             | 0...0.99999                       | count rate =         | $4.42717 \times 10^{257} \pm 4.96 \times 10^{258}$ | Hz 0...10 <sup>50</sup>                       |
| $T_{D,2} =$ F       | $5.20741 \times 10^7 \pm 1.7 \times 10^8$ | $\mu\text{s}$ 1...10 <sup>8</sup> | background =         | 0 $\pm$ 0                                          | Hz 0...10 <sup>50</sup>                       |
| $G_{\infty} =$ FX   | 0 $\pm$ 0                                 | -10...10                          | cnt/molec = C        | $1.22237 \times 10^{257} \pm 1.37 \times 10^{258}$ | Hz 0...10 <sup>50</sup>                       |

legend: F: fit parameter, X: fixed parameter, C: calculated parameter

### Fit Result Message:

converged (the relative error of the parameter vector is at most tol)

### Fit Statistics:

$$\chi^2 = 1.93548 \quad \chi^2 \text{ (weighted)} = 8437.19$$

## Endoplasmatic Reticulum fitting data

### Model Parameters (fit results):

| Parameter           | Value                                         | Range                             | Parameter            | Value                                                            | Range                                         |
|---------------------|-----------------------------------------------|-----------------------------------|----------------------|------------------------------------------------------------------|-----------------------------------------------|
| # non-fluorescent = | 0                                             | 0...2                             | $\gamma =$ FX        | $7 \pm 0$                                                        | 0.01...100                                    |
| components =        | 2                                             | 1...3                             | $w_{x,y} =$          | $286.451 \pm 0$                                                  | nm 0...10 <sup>4</sup>                        |
| N = F               | $2.6105 \pm 0.0725$                           | $10^{-10} \dots 10^5$             | $V_{\text{eff}} =$ C | $0.91617 \pm 0$                                                  | fl 0...10 <sup>50</sup>                       |
| 1/N = C             | $0.3831 \pm 0.0106$                           | $10^{-10} \dots 10^5$             | $C_{\text{all}} =$ C | $4.7316 \pm 0.131$                                               | nM 0...10 <sup>50</sup>                       |
| $\rho_1 =$ C        | $0.9642 \pm 0.456$                            | 0...0.99999                       | $D_1 =$ C            | $1.981 \pm 1.46$                                                 | $\mu\text{m}^2/\text{s}$ 0...10 <sup>50</sup> |
| $T_{D,1} =$ F       | $1.03549 \times 10^4 \pm 7630$                | $\mu\text{s}$ 1...10 <sup>5</sup> | $D_2 =$ C            | $2 \times 10^{-4} \pm 3.74$                                      | $\mu\text{m}^2/\text{s}$ 0...10 <sup>50</sup> |
| $\rho_2 =$ F        | 0.0358 $\pm$ 0.456                            | 0...0.99999                       | count rate =         | $1.11113 \times 10^{297} \pm \text{nan} \times 10^{-2147483648}$ | Hz 0...10 <sup>50</sup>                       |
| $T_{D,2} =$ F       | $9.17511 \times 10^7 \pm 1.54 \times 10^{12}$ | $\mu\text{s}$ 1...10 <sup>8</sup> | background =         | 0 $\pm$ 0                                                        | Hz 0...10 <sup>50</sup>                       |
| $G_{\infty} =$ FX   | 0 $\pm$ 0                                     | -10...10                          | cnt/molec = C        | $4.25632 \times 10^{296} \pm \text{nan} \times 10^{-2147483648}$ | Hz 0...10 <sup>50</sup>                       |

legend: F: fit parameter, X: fixed parameter, C: calculated parameter

### Fit Result Message:

levmar returned after 3000 iterations.  
reason: stopped by maximum iterations. SES = 12.5884 [old\_SES = 12.5927]

### Fit Statistics:

$$\chi^2 = 1.25248 \quad \chi^2 \text{ (weighted)} = 13914.6$$



## Cytoplasm fitting data

### Model Parameters (fit results):

| Parameter           | Value               | Range                                | Parameter     | Value                                                            | Range                                         |
|---------------------|---------------------|--------------------------------------|---------------|------------------------------------------------------------------|-----------------------------------------------|
| # non-fluorescent = | 0                   | 0...2                                | $\gamma =$ FX | $7 \pm 0$                                                        | 0.01...100                                    |
| components =        | 2                   | 1...3                                | $w_{x,y} =$   | $286.451 \pm 0$                                                  | nm 0...10 <sup>4</sup>                        |
| N = F               | $1.9839 \pm 0.28$   | 10 <sup>-10</sup> ...10 <sup>5</sup> | $V_{eff} =$ C | $0.91617 \pm 0$                                                  | fl 0...10 <sup>50</sup>                       |
| 1/N = C             | $0.5041 \pm 0.0711$ | 10 <sup>-10</sup> ...10 <sup>5</sup> | $C_{all} =$ C | $3.5957 \pm 0.507$                                               | nM 0...10 <sup>50</sup>                       |
| $\rho_1 =$ C        | $0.5989 \pm 0.08$   | 0...0.99999                          | $D_1 =$ C     | $4.5508 \pm 0.367$                                               | $\mu\text{m}^2/\text{s}$ 0...10 <sup>50</sup> |
| $\tau_{D,1} =$ F    | $4507.6857 \pm 363$ | $\mu\text{s}$ 1...10 <sup>5</sup>    | $D_2 =$ C     | $4369.4315 \pm 2950$                                             | $\mu\text{m}^2/\text{s}$ 0...10 <sup>50</sup> |
| $\rho_2 =$ F        | $0.4011 \pm 0.08$   | 0...0.99999                          | count rate =  | $6.33259 \times 10^{197} \pm \text{nan} \times 10^{-2147483648}$ | Hz 0...10 <sup>50</sup>                       |
| $\tau_{D,2} =$ F    | $4.6948 \pm 3.17$   | $\mu\text{s}$ 1...10 <sup>5</sup>    | background =  | $0 \pm 0$                                                        | Hz 0...10 <sup>50</sup>                       |
| $G_{\infty} =$ FX   | $0 \pm 0$           | -10...10                             | cnt/molec = C | $3.19207 \times 10^{197} \pm \text{nan} \times 10^{-2147483648}$ | Hz 0...10 <sup>50</sup>                       |

*Legend: F: fit parameter, X: fixed parameter, C: calculated parameter*

### Fit Result Message:

**levmar** returned after 33 iterations.  
reason: stopped by small  $\delta_p$ . SES = 45.4174 [old\_SES = 49.6503]

### Fit Statistics:

$$\chi^2 = 0.979972 \quad \chi^2 \text{ (weighted)} = 577.809$$

### Fitting of FCS data for Au- Alkyl-PEG<sub>600</sub>\* NPs in living cells

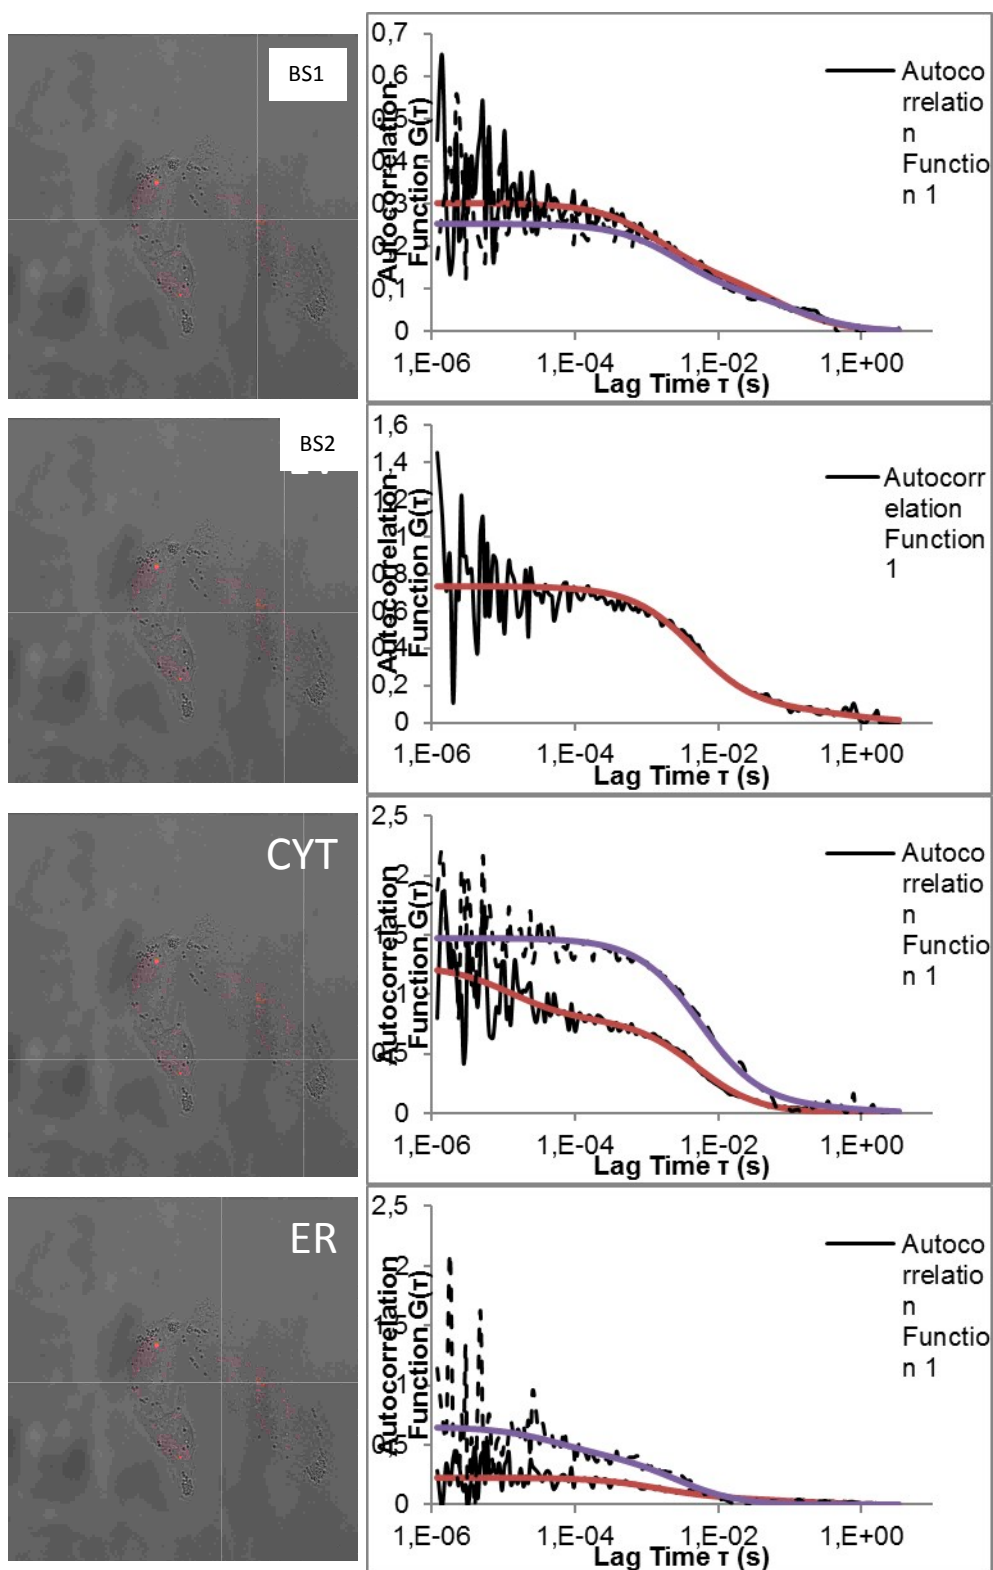

**Figure S26** Confocal micrographs of A549 cell treated by Au-Alkyl-PEG<sub>600</sub>\* NPs for 30 min and the correlograms related to the marked spot. For each spot 20 tracks were recorded, screened for the diffusion time and grouped according to the class of diffusion times they belonged to. The average of those tracks were fit and the fit data are reported below. Fit were done by QuickFit 3.0 by a 3D Normal Diffusion model with two diffusing components. In the statistical distributions in Fig. 8 and 9 were included only the components with fraction  $p > 0.5$ .

## BS1 fitting data 1

### Model Parameters (fit results):

| Parameter           | Value                                                  | Range                 | Parameter            | Value                                                            | Range                                         |
|---------------------|--------------------------------------------------------|-----------------------|----------------------|------------------------------------------------------------------|-----------------------------------------------|
| # non-fluorescent = | 0                                                      | 0...2                 | $\gamma =$ FX        | $7 \pm 0$                                                        | 0.01...100                                    |
| components =        | 2                                                      | 1...3                 | $w_{x,y} =$          | $250 \pm 0$                                                      | nm 0...10 <sup>4</sup>                        |
| N = F               | $3.3103 \pm 0.04$                                      | $10^{-10} \dots 10^5$ | $V_{\text{eff}} =$ C | $0.60904 \pm 0$                                                  | fl 0...10 <sup>50</sup>                       |
| 1/N = C             | $0.30209 \pm 0.00365$                                  | $10^{-10} \dots 10^5$ | $C_{\text{all}} =$ C | $9.0254 \pm 0.109$                                               | nM 0...10 <sup>50</sup>                       |
| $\rho_1 =$ C        | $0.4317 \pm 0.102$                                     | 0...0.99999           | $D_1 =$ C            | $0.2117 \pm 0.25$                                                | $\mu\text{m}^2/\text{s}$ 0...10 <sup>50</sup> |
| $T_{D,1} =$ F       | $7.38022 \times 10^4 \pm 8.71 \times 10^4 \mu\text{s}$ | 1...10 <sup>5</sup>   | $D_2 =$ C            | $10.4692 \pm 3.24$                                               | $\mu\text{m}^2/\text{s}$ 0...10 <sup>50</sup> |
| $\rho_2 =$ F        | $0.5683 \pm 0.102$                                     | 0...0.99999           | count rate =         | $1.36755 \times 10^{297} \pm \text{nan} \times 10^{-2147483648}$ | Hz 0...10 <sup>50</sup>                       |
| $T_{D,2} =$ F       | $1492.4704 \pm 462 \mu\text{s}$                        | 1...10 <sup>8</sup>   | background =         | $0 \pm 0$                                                        | Hz 0...10 <sup>50</sup>                       |
| $G_{\infty} =$ FX   | $0 \pm 0$                                              | -10...10              | cnt/molec = C        | $4.13125 \times 10^{296} \pm \text{nan} \times 10^{-2147483648}$ | Hz 0...10 <sup>50</sup>                       |

*Legend: F: fit parameter, X: fixed parameter, C: calculated parameter*

### Fit Result Message:

levmar returned after 3000 iterations.  
reason: stopped by maximum iterations. SES = 314.89 [old\_SES = 315.647]

### Fit Statistics:

$$\chi^2 = 0.478372 \quad \chi^2 \text{ (weighted)} = 452.912$$

## BS1 fitting data 2

### Model Parameters (fit results):

| Parameter           | Value                                                  | Range                 | Parameter            | Value                | Range                                         |
|---------------------|--------------------------------------------------------|-----------------------|----------------------|----------------------|-----------------------------------------------|
| # non-fluorescent = | 0                                                      | 0...2                 | $\gamma =$ FX        | $7 \pm 0$            | 0.01...100                                    |
| components =        | 2                                                      | 1...3                 | $w_{x,y} =$          | $250 \pm 0$          | nm 0...10 <sup>4</sup>                        |
| N = F               | $3.9471 \pm 0.0343$                                    | $10^{-10} \dots 10^5$ | $V_{\text{eff}} =$ C | $0.60904 \pm 0$      | fl 0...10 <sup>50</sup>                       |
| 1/N = C             | $0.25335 \pm 0.0022$                                   | $10^{-10} \dots 10^5$ | $C_{\text{all}} =$ C | $10.7617 \pm 0.0934$ | nM 0...10 <sup>50</sup>                       |
| $\rho_1 =$ C        | $0.6442 \pm 0.0483$                                    | 0...0.99999           | $D_1 =$ C            | $5.5897 \pm 0.715$   | $\mu\text{m}^2/\text{s}$ 0...10 <sup>50</sup> |
| $T_{D,1} =$ F       | $2795.3029 \pm 357 \mu\text{s}$                        | 1...10 <sup>5</sup>   | $D_2 =$ C            | $0.1107 \pm 0.0304$  | $\mu\text{m}^2/\text{s}$ 0...10 <sup>50</sup> |
| $\rho_2 =$ F        | $0.3558 \pm 0.0483$                                    | 0...0.99999           | count rate =         | $0 \pm 0$            | Hz 0...10 <sup>50</sup>                       |
| $T_{D,2} =$ F       | $1.41208 \times 10^5 \pm 3.88 \times 10^4 \mu\text{s}$ | 1...10 <sup>8</sup>   | background =         | $0 \pm 0$            | Hz 0...10 <sup>50</sup>                       |
| $G_{\infty} =$ FX   | $0 \pm 0$                                              | -10...10              | cnt/molec = C        | $0 \pm 0$            | Hz 0...10 <sup>50</sup>                       |

*Legend: F: fit parameter, X: fixed parameter, C: calculated parameter*

### Fit Result Message:

levmar returned after 3000 iterations.  
reason: stopped by maximum iterations. SES = 6443.98 [old\_SES = 6443.98]

### Fit Statistics:

$$\chi^2 = 0.452642 \quad \chi^2 \text{ (weighted)} = 6443.98$$

## BS2 fitting data

### Model Parameters (fit results):

| Parameter           | Value                                                   | Range                                | Parameter            | Value                                          | Range                |
|---------------------|---------------------------------------------------------|--------------------------------------|----------------------|------------------------------------------------|----------------------|
| # non-fluorescent = | 0                                                       | 0...2                                | $\gamma =$ FX        | $7 \pm 0$                                      | 0.01...100           |
| components =        | 2                                                       | 1...3                                | $w_{x,y} =$          | $250 \pm 0$ nm                                 | 0...10 <sup>4</sup>  |
| N = F               | $1.3629 \pm 0.0333$                                     | 10 <sup>-10</sup> ...10 <sup>5</sup> | $V_{\text{eff}} =$ C | $0.60904 \pm 0$ fl                             | 0...10 <sup>50</sup> |
| 1/N = C             | $0.7337 \pm 0.018$                                      | 10 <sup>-10</sup> ...10 <sup>5</sup> | $C_{\text{all}} =$ C | $3.7159 \pm 0.0909$ nM                         | 0...10 <sup>50</sup> |
| $\rho_1 =$ C        | $0.9019 \pm 0.0114$                                     | 0...0.99999                          | $D_1 =$ C            | $3.3224 \pm 0.555$ $\mu\text{m}^2/\text{s}$    | 0...10 <sup>50</sup> |
| $T_{D,1} =$ F       | $4702.8853 \pm 786$ $\mu\text{s}$                       | 1...10 <sup>5</sup>                  | $D_2 =$ C            | $0.02314 \pm 0.00754$ $\mu\text{m}^2/\text{s}$ | 0...10 <sup>50</sup> |
| $\rho_2 =$ F        | $0.0981 \pm 0.0114$                                     | 0...0.99999                          | count rate =         | $0 \pm 0$ Hz                                   | 0...10 <sup>50</sup> |
| $T_{D,2} =$ F       | $6.75214 \times 10^5 \pm 2.2 \times 10^5$ $\mu\text{s}$ | 1...10 <sup>8</sup>                  | background =         | $0 \pm 0$ Hz                                   | 0...10 <sup>50</sup> |
| $G_{\infty} =$ FX   | $0 \pm 0$                                               | -10...10                             | cnt/molec = C        | $0 \pm 0$ Hz                                   | 0...10 <sup>50</sup> |

*legend: F: fit parameter, X: fixed parameter, C: calculated parameter*

### Fit Result Message:

levmar returned after 3000 iterations.  
reason: stopped by maximum iterations. SES = 45.6812 [old\_SES = 45.6817]

### Fit Statistics:

$$\chi^2 = 2.34138 \quad \chi^2 \text{ (weighted)} = 45.6813$$

## Cytoplasm fitting data 1

### Model Parameters (fit results):

| Parameter           | Value                             | Range                                | Parameter            | Value                                         | Range                |
|---------------------|-----------------------------------|--------------------------------------|----------------------|-----------------------------------------------|----------------------|
| # non-fluorescent = | 0                                 | 0...2                                | $\gamma =$ FX        | $7 \pm 0$                                     | 0.01...100           |
| components =        | 2                                 | 1...3                                | $w_{x,y} =$          | $312.789 \pm 0$ nm                            | 0...10 <sup>4</sup>  |
| N = F               | $0.8051 \pm 0.0551$               | 10 <sup>-10</sup> ...10 <sup>5</sup> | $V_{\text{eff}} =$ C | $1.19283 \pm 0$ fl                            | 0...10 <sup>50</sup> |
| 1/N = C             | $1.2421 \pm 0.085$                | 10 <sup>-10</sup> ...10 <sup>5</sup> | $C_{\text{all}} =$ C | $1.1208 \pm 0.0767$ nM                        | 0...10 <sup>50</sup> |
| $\rho_1 =$ C        | $0.3651 \pm 0.0417$               | 0...0.99999                          | $D_1 =$ C            | $1939.2879 \pm 1170$ $\mu\text{m}^2/\text{s}$ | 0...10 <sup>50</sup> |
| $T_{D,1} =$ F       | $12.6125 \pm 7.6$ $\mu\text{s}$   | 1...10 <sup>5</sup>                  | $D_2 =$ C            | $4.9235 \pm 0.717$ $\mu\text{m}^2/\text{s}$   | 0...10 <sup>50</sup> |
| $\rho_2 =$ F        | $0.6349 \pm 0.0417$               | 0...0.99999                          | count rate =         | $0 \pm 0$ Hz                                  | 0...10 <sup>50</sup> |
| $T_{D,2} =$ F       | $4967.8357 \pm 724$ $\mu\text{s}$ | 1...10 <sup>8</sup>                  | background =         | $0 \pm 0$ Hz                                  | 0...10 <sup>50</sup> |
| $G_{\infty} =$ FX   | $0 \pm 0$                         | -10...10                             | cnt/molec = C        | $0 \pm 0$ Hz                                  | 0...10 <sup>50</sup> |

*legend: F: fit parameter, X: fixed parameter, C: calculated parameter*

### Fit Result Message:

levmar returned after 3000 iterations.  
reason: stopped by maximum iterations. SES = 9.29021 [old\_SES = 9.29023]

### Fit Statistics:

$$\chi^2 = 3.45902 \quad \chi^2 \text{ (weighted)} = 14.6331$$



## Cytoplasm fitting data 2

### Model Parameters (fit results):

| Parameter           | Value                                                   | Range                                | Parameter            | Value                                        | Range                |
|---------------------|---------------------------------------------------------|--------------------------------------|----------------------|----------------------------------------------|----------------------|
| # non-fluorescent = | 0                                                       | 0...2                                | $\gamma = FX$        | $7 \pm 0$                                    | 0.01...100           |
| components =        | 2                                                       | 1...3                                | $w_{x,y} =$          | $312.789 \pm 0$ nm                           | 0...10 <sup>4</sup>  |
| N = F               | $0.6775 \pm 0.0126$                                     | 10 <sup>-10</sup> ...10 <sup>5</sup> | $V_{\text{eff}} = C$ | $1.19283 \pm 0$ fl                           | 0...10 <sup>50</sup> |
| 1/N = C             | $1.476 \pm 0.0275$                                      | 10 <sup>-10</sup> ...10 <sup>5</sup> | $C_{\text{all}} = C$ | $0.9432 \pm 0.0175$ nM                       | 0...10 <sup>50</sup> |
| $\rho_1 = C$        | $0.9617 \pm 0.013$                                      | 0...0.99999                          | $D_1 = C$            | $4.3798 \pm 0.506$ $\mu\text{m}^2/\text{s}$  | 0...10 <sup>50</sup> |
| $T_{D,1} = F$       | $5584.5975 \pm 645$ $\mu\text{s}$                       | 1...10 <sup>5</sup>                  | $D_2 = C$            | $0.0298 \pm 0.0237$ $\mu\text{m}^2/\text{s}$ | 0...10 <sup>50</sup> |
| $\rho_2 = F$        | $0.0383 \pm 0.013$                                      | 0...0.99999                          | count rate =         | $0 \pm 0$ Hz                                 | 0...10 <sup>50</sup> |
| $T_{D,2} = F$       | $8.19941 \times 10^5 \pm 6.5 \times 10^5$ $\mu\text{s}$ | 1...10 <sup>8</sup>                  | background =         | $0 \pm 0$ Hz                                 | 0...10 <sup>50</sup> |
| $G_{\infty} = FX$   | $0 \pm 0$                                               | -10...10                             | cnt/molec = C        | $0 \pm 0$ Hz                                 | 0...10 <sup>50</sup> |

*legend: F: fit parameter, X: fixed parameter, C: calculated parameter*

### Fit Result Message:

levmar returned after 3000 iterations.  
reason: stopped by maximum iterations. SES = 33.6517 [old\_SES = 33.6518]

### Fit Statistics:

$$\chi^2 = 3.78304 \quad \chi^2 \text{ (weighted)} = 33.6517$$

## Endoplasmatic Reticulum Fitting data 1

### Model Parameters (fit results):

| Parameter           | Value                                                    | Range                                | Parameter            | Value                                        | Range                |
|---------------------|----------------------------------------------------------|--------------------------------------|----------------------|----------------------------------------------|----------------------|
| # non-fluorescent = | 0                                                        | 0...2                                | $\gamma = FX$        | $7 \pm 0$                                    | 0.01...100           |
| components =        | 2                                                        | 1...3                                | $w_{x,y} =$          | $312.789 \pm 0$ nm                           | 0...10 <sup>4</sup>  |
| N = F               | $4.3871 \pm 0.0912$                                      | 10 <sup>-10</sup> ...10 <sup>5</sup> | $V_{\text{eff}} = C$ | $1.19283 \pm 0$ fl                           | 0...10 <sup>50</sup> |
| 1/N = C             | $0.22794 \pm 0.00474$                                    | 10 <sup>-10</sup> ...10 <sup>5</sup> | $C_{\text{all}} = C$ | $6.1073 \pm 0.127$ nM                        | 0...10 <sup>50</sup> |
| $\rho_1 = C$        | $0.7696 \pm 0.0221$                                      | 0...0.99999                          | $D_1 = C$            | $16.3911 \pm 2.92$ $\mu\text{m}^2/\text{s}$  | 0...10 <sup>50</sup> |
| $T_{D,1} = F$       | $1492.23 \pm 265$ $\mu\text{s}$                          | 1...10 <sup>5</sup>                  | $D_2 = C$            | $0.1555 \pm 0.0291$ $\mu\text{m}^2/\text{s}$ | 0...10 <sup>50</sup> |
| $\rho_2 = F$        | $0.2304 \pm 0.0221$                                      | 0...0.99999                          | count rate =         | $0 \pm 0$ Hz                                 | 0...10 <sup>50</sup> |
| $T_{D,2} = F$       | $1.57252 \times 10^5 \pm 2.95 \times 10^4$ $\mu\text{s}$ | 1...10 <sup>8</sup>                  | background =         | $0 \pm 0$ Hz                                 | 0...10 <sup>50</sup> |
| $G_{\infty} = FX$   | $0 \pm 0$                                                | -10...10                             | cnt/molec = C        | $0 \pm 0$ Hz                                 | 0...10 <sup>50</sup> |

*legend: F: fit parameter, X: fixed parameter, C: calculated parameter*

### Fit Result Message:

levmar returned after 3000 iterations.  
reason: stopped by maximum iterations. SES = 485.164 [old\_SES = 487.769]

### Fit Statistics:

$$\chi^2 = 0.73685 \quad \chi^2 \text{ (weighted)} = 485.164$$

## Endoplasmatic Reticulum Fitting data 2

### Model Parameters (fit results):

| Parameter           | Value                | Range                             | Parameter            | Value                                              | Range                                         |
|---------------------|----------------------|-----------------------------------|----------------------|----------------------------------------------------|-----------------------------------------------|
| # non-fluorescent = | 0                    | 0...2                             | $\gamma =$ FX        | $7 \pm 0$                                          | 0.01...100                                    |
| components =        | 2                    | 1...3                             | $w_{x,y} =$          | $312.789 \pm 0$                                    | nm 0...10 <sup>4</sup>                        |
| N = F               | $1.5398 \pm 0.131$   | $10^{-10} \dots 10^5$             | $V_{\text{eff}} =$ C | $1.19283 \pm 0$                                    | fl 0...10 <sup>50</sup>                       |
| 1/N = C             | $0.6495 \pm 0.0554$  | $10^{-10} \dots 10^5$             | $C_{\text{all}} =$ C | $2.1435 \pm 0.183$                                 | nM 0...10 <sup>50</sup>                       |
| $\rho_1 =$ C        | $0.3667 \pm 0.103$   | 0...0.99999                       | $D_1 =$ C            | $458.9068 \pm 539$                                 | $\mu\text{m}^2/\text{s}$ 0...10 <sup>50</sup> |
| $\tau_{0,1} =$ F    | $53.2989 \pm 62.6$   | $\mu\text{s}$ 1...10 <sup>5</sup> | $D_2 =$ C            | $8.9151 \pm 3.34$                                  | $\mu\text{m}^2/\text{s}$ 0...10 <sup>50</sup> |
| $\rho_2 =$ F        | $0.6333 \pm 0.103$   | 0...0.99999                       | count rate =         | $4.67056 \times 10^{198} \pm 9.05 \times 10^{198}$ | Hz 0...10 <sup>50</sup>                       |
| $\tau_{0,2} =$ F    | $2743.5803 \pm 1030$ | $\mu\text{s}$ 1...10 <sup>8</sup> | background =         | $0 \pm 0$                                          | Hz 0...10 <sup>50</sup>                       |
| $G_{\infty} =$ FX   | $0 \pm 0$            | -10...10                          | cnt/molec = C        | $3.03332 \times 10^{198} \pm 5.88 \times 10^{198}$ | Hz 0...10 <sup>50</sup>                       |

*legend: F: fit parameter, X: fixed parameter, C: calculated parameter*

### Fit Result Message:

levmar returned after 3000 iterations.  
reason: stopped by maximum iterations. SES = 34.6472 [old\_SES = 34.6472]

### Fit Statistics:

$$\chi^2 = 5.91977$$

$$\chi^2 \text{ (weighted)} = 41.8104$$

## Fitting of FCS data for Au-MSA \* NPs in living cells

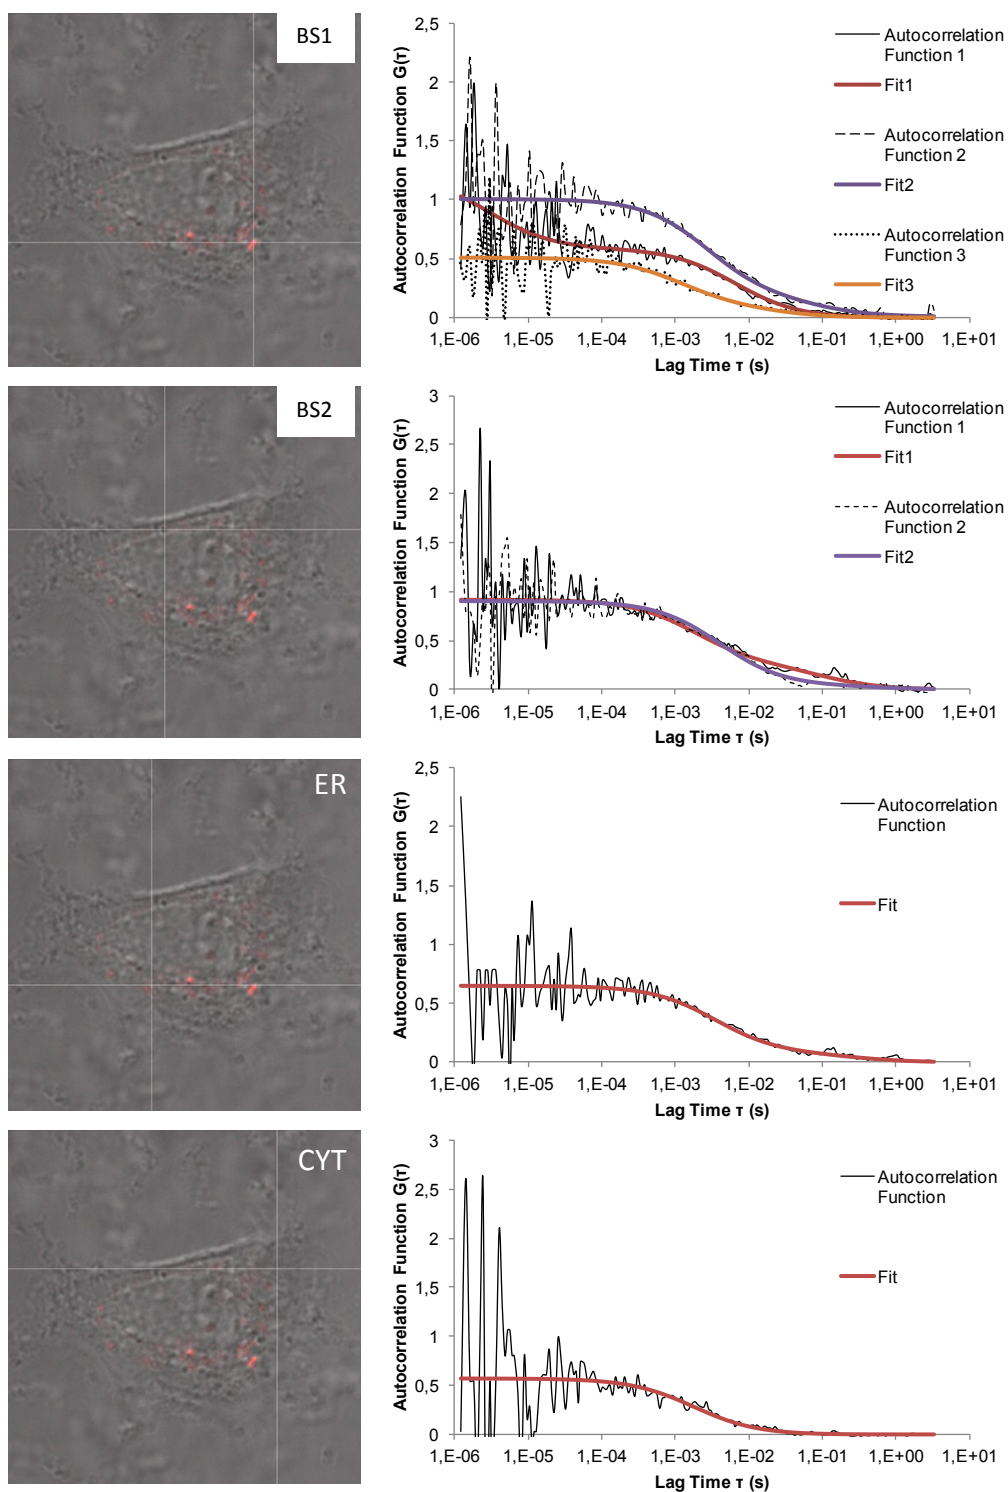

**Figure S27** Confocal micrographs of A549 cell treated by Au-MSA\* NPs for 30 min and the correlograms related to the marked spot. For each spot 20 tracks were recorded, screened for the diffusion time and grouped according to the class of diffusion times they belonged to. The average of those tracks were fit and the fit data are reported below. Fit were done by QuickFit 3.0 by a 3D Normal Diffusion model with two diffusing components. In the statistical distributions in Fig. 8 and 9 were included only the components with fraction  $\rho > 0.5$ .

## BS1 Fitting data 1

### Model Parameters (fit results):

| Parameter           | Value                            | Range                 | Parameter     | Value                                         | Range             |
|---------------------|----------------------------------|-----------------------|---------------|-----------------------------------------------|-------------------|
| # non-fluorescent = | 0                                | 0...2                 | $\gamma =$ FX | $7 \pm 1.6$                                   | 0.01...100        |
| components =        | 2                                | 1...3                 | $w_{x,y} =$   | $295.47 \pm 12$ nm                            | $0 \dots 10^4$    |
| N = F               | $0.8265 \pm 0.227$               | $10^{-10} \dots 10^5$ | $V_{eff} =$ C | $1.0055 \pm 0.26$ fl                          | $0 \dots 10^{50}$ |
| 1/N = C             | $1.2099 \pm 0.332$               | $10^{-10} \dots 10^5$ | $C_{all} =$ C | $1.365 \pm 0.515$ nM                          | $0 \dots 10^{50}$ |
| $\rho_1 =$ C        | $0.5157 \pm 0.126$               | 0...0.99999           | $D_1 =$ C     | $7451.2008 \pm 7630$ $\mu\text{m}^2/\text{s}$ | $0 \dots 10^{50}$ |
| $\tau_{D,1} =$ F    | $2.9291 \pm 2.99$ $\mu\text{s}$  | $1 \dots 10^5$        | $D_2 =$ C     | $3.3043 \pm 0.445$ $\mu\text{m}^2/\text{s}$   | $0 \dots 10^{50}$ |
| $\rho_2 =$ F        | $0.4843 \pm 0.126$               | 0...0.99999           | count rate =  | $0 \pm 0$ Hz                                  | $0 \dots 10^{50}$ |
| $\tau_{D,2} =$ F    | $6605.269 \pm 709$ $\mu\text{s}$ | $1 \dots 10^8$        | background =  | $0 \pm 0$ Hz                                  | $0 \dots 10^{50}$ |
| $G_{\infty} =$ FX   | $0 \pm 0$                        | -10...10              | cnt/molec = C | $0 \pm 0$ Hz                                  | $0 \dots 10^{50}$ |

*legend: F: fit parameter, X: fixed parameter, C: calculated parameter*

### Fit Result Message:

levmar returned after 3000 iterations.  
reason: stopped by maximum iterations. SES = 19.9032 [old\_SES = 19.9033]

### Fit Statistics:

$$\chi^2 = 5.14181 \quad \chi^2 \text{ (weighted)} = 19.9032$$

## BS1 Fitting data 2

### Model Parameters (fit results):

| Parameter           | Value                                                    | Range                 | Parameter     | Value                                       | Range             |
|---------------------|----------------------------------------------------------|-----------------------|---------------|---------------------------------------------|-------------------|
| # non-fluorescent = | 0                                                        | 0...2                 | $\gamma =$ FX | $7 \pm 1.6$                                 | 0.01...100        |
| components =        | 2                                                        | 1...3                 | $w_{x,y} =$   | $295.47 \pm 12$ nm                          | $0 \dots 10^4$    |
| N = F               | $0.9904 \pm 0.0442$                                      | $10^{-10} \dots 10^5$ | $V_{eff} =$ C | $1.0055 \pm 0.26$ fl                        | $0 \dots 10^{50}$ |
| 1/N = C             | $1.0097 \pm 0.045$                                       | $10^{-10} \dots 10^5$ | $C_{all} =$ C | $1.6356 \pm 0.43$ nM                        | $0 \dots 10^{50}$ |
| $\rho_1 =$ C        | $0.8367 \pm 0.072$                                       | 0...0.99999           | $D_1 =$ C     | $7.8723 \pm 2.87$ $\mu\text{m}^2/\text{s}$  | $0 \dots 10^{50}$ |
| $\tau_{D,1} =$ F    | $2772.4479 \pm 984$ $\mu\text{s}$                        | $1 \dots 10^5$        | $D_2 =$ C     | $0.2561 \pm 0.159$ $\mu\text{m}^2/\text{s}$ | $0 \dots 10^{50}$ |
| $\rho_2 =$ F        | $0.1633 \pm 0.072$                                       | 0...0.99999           | count rate =  | $0 \pm 0$ Hz                                | $0 \dots 10^{50}$ |
| $\tau_{D,2} =$ F    | $8.52106 \times 10^4 \pm 5.24 \times 10^4$ $\mu\text{s}$ | $1 \dots 10^8$        | background =  | $0 \pm 0$ Hz                                | $0 \dots 10^{50}$ |
| $G_{\infty} =$ FX   | $0 \pm 0$                                                | -10...10              | cnt/molec = C | $0 \pm 0$ Hz                                | $0 \dots 10^{50}$ |

*legend: F: fit parameter, X: fixed parameter, C: calculated parameter*

### Fit Result Message:

levmar returned after 3000 iterations.  
reason: stopped by maximum iterations. SES = 68.5189 [old\_SES = 68.5195]

### Fit Statistics:

$$\chi^2 = 5.42513 \quad \chi^2 \text{ (weighted)} = 68.5189$$



### BS1 Fitting data 3

#### Model Parameters (fit results):

| Parameter           | Value                                                    | Range                                | Parameter            | Value                                       | Range                |
|---------------------|----------------------------------------------------------|--------------------------------------|----------------------|---------------------------------------------|----------------------|
| # non-fluorescent = | 0                                                        | 0...2                                | $\gamma =$ FX        | $7 \pm 1.6$                                 | 0.01...100           |
| components =        | 2                                                        | 1...3                                | $w_{x,y} =$          | $295.47 \pm 12$ nm                          | 0...10 <sup>4</sup>  |
| N = F               | $1.9701 \pm 0.0792$                                      | 10 <sup>-10</sup> ...10 <sup>5</sup> | $V_{\text{eff}} =$ C | $1.0055 \pm 0.26$ fl                        | 0...10 <sup>50</sup> |
| 1/N = C             | $0.5076 \pm 0.0204$                                      | 10 <sup>-10</sup> ...10 <sup>5</sup> | $C_{\text{all}} =$ C | $3.2537 \pm 0.853$ nM                       | 0...10 <sup>50</sup> |
| $\rho_1 =$ C        | $0.824 \pm 0.124$                                        | 0...0.99999                          | $D_1 =$ C            | $18.2316 \pm 7.85$ $\mu\text{m}^2/\text{s}$ | 0...10 <sup>50</sup> |
| $T_{D,1} =$ F       | $1197.1351 \pm 506$ $\mu\text{s}$                        | 1...10 <sup>5</sup>                  | $D_2 =$ C            | $0.9307 \pm 0.778$ $\mu\text{m}^2/\text{s}$ | 0...10 <sup>50</sup> |
| $\rho_2 =$ F        | $0.176 \pm 0.124$                                        | 0...0.99999                          | count rate =         | $0 \pm 0$ Hz                                | 0...10 <sup>50</sup> |
| $T_{D,2} =$ F       | $2.34503 \times 10^4 \pm 1.95 \times 10^4$ $\mu\text{s}$ | 1...10 <sup>8</sup>                  | background =         | $0 \pm 0$ Hz                                | 0...10 <sup>50</sup> |
| $G_{\infty} =$ FX   | $0 \pm 0$                                                | -10...10                             | cnt/molec = C        | $0 \pm 0$ Hz                                | 0...10 <sup>50</sup> |

*Legend: F: fit parameter, X: fixed parameter, C: calculated parameter*

#### Fit Result Message:

levmar returned after 3000 iterations.  
reason: stopped by maximum iterations. SES = 10.4931 [old\_SES = 10.4931]

#### Fit Statistics:

$$\chi^2 = 2.71288 \quad \chi^2 \text{ (weighted)} = 10.4931$$

### BS2 Fitting data 1

#### Model Parameters (fit results):

| Parameter           | Value                                                    | Range                                | Parameter            | Value                                        | Range                |
|---------------------|----------------------------------------------------------|--------------------------------------|----------------------|----------------------------------------------|----------------------|
| # non-fluorescent = | 0                                                        | 0...2                                | $\gamma =$ FX        | $7 \pm 1.6$                                  | 0.01...100           |
| components =        | 2                                                        | 1...3                                | $w_{x,y} =$          | $295.47 \pm 12$ nm                           | 0...10 <sup>4</sup>  |
| N = F               | $1.1111 \pm 0.033$                                       | 10 <sup>-10</sup> ...10 <sup>5</sup> | $V_{\text{eff}} =$ C | $1.0055 \pm 0.26$ fl                         | 0...10 <sup>50</sup> |
| 1/N = C             | $0.9 \pm 0.0267$                                         | 10 <sup>-10</sup> ...10 <sup>5</sup> | $C_{\text{all}} =$ C | $1.835 \pm 0.478$ nM                         | 0...10 <sup>50</sup> |
| $\rho_1 =$ C        | $0.9515 \pm 0.0154$                                      | 0...0.99999                          | $D_1 =$ C            | $5.3423 \pm 0.855$ $\mu\text{m}^2/\text{s}$  | 0...10 <sup>50</sup> |
| $T_{D,1} =$ F       | $4085.4731 \pm 563$ $\mu\text{s}$                        | 1...10 <sup>5</sup>                  | $D_2 =$ C            | $0.0366 \pm 0.0232$ $\mu\text{m}^2/\text{s}$ | 0...10 <sup>50</sup> |
| $\rho_2 =$ F        | $0.0485 \pm 0.0154$                                      | 0...0.99999                          | count rate =         | $0 \pm 0$ Hz                                 | 0...10 <sup>50</sup> |
| $T_{D,2} =$ F       | $5.97098 \times 10^5 \pm 3.76 \times 10^5$ $\mu\text{s}$ | 1...10 <sup>8</sup>                  | background =         | $0 \pm 0$ Hz                                 | 0...10 <sup>50</sup> |
| $G_{\infty} =$ FX   | $0 \pm 0$                                                | -10...10                             | cnt/molec = C        | $0 \pm 0$ Hz                                 | 0...10 <sup>50</sup> |

*Legend: F: fit parameter, X: fixed parameter, C: calculated parameter*

#### Fit Result Message:

levmar returned after 3000 iterations.  
reason: stopped by maximum iterations. SES = 42.8195 [old\_SES = 42.8195]

#### Fit Statistics:

$$\chi^2 = 5.25844 \quad \chi^2 \text{ (weighted)} = 42.8195$$

## BS2 Fitting data 2

### Model Parameters (fit results):

| Parameter           | Value                                                    | Range                 | Parameter            | Value                                        | Range             |
|---------------------|----------------------------------------------------------|-----------------------|----------------------|----------------------------------------------|-------------------|
| # non-fluorescent = | 0                                                        | 0...2                 | $\gamma =$ FX        | $7 \pm 1.6$                                  | 0.01...100        |
| components =        | 2                                                        | 1...3                 | $w_{x,y} =$          | $295.47 \pm 12$ nm                           | $0 \dots 10^4$    |
| N = F               | $1.0866 \pm 0.0456$                                      | $10^{-10} \dots 10^5$ | $V_{\text{eff}} =$ C | $1.0055 \pm 0.26$ fl                         | $0 \dots 10^{50}$ |
| 1/N = C             | $0.9203 \pm 0.0386$                                      | $10^{-10} \dots 10^5$ | $C_{\text{all}} =$ C | $1.7946 \pm 0.471$ nM                        | $0 \dots 10^{50}$ |
| $\rho_1 =$ C        | $0.7094 \pm 0.0493$                                      | $0 \dots 0.99999$     | $D_1 =$ C            | $11.7852 \pm 4.31$ $\mu\text{m}^2/\text{s}$  | $0 \dots 10^{50}$ |
| $T_{D,1} =$ F       | $1851.9542 \pm 661$ $\mu\text{s}$                        | $1 \dots 10^5$        | $D_2 =$ C            | $0.2172 \pm 0.0582$ $\mu\text{m}^2/\text{s}$ | $0 \dots 10^{50}$ |
| $\rho_2 =$ F        | $0.2906 \pm 0.0493$                                      | $0 \dots 0.99999$     | count rate =         | $0 \pm 0$ Hz                                 | $0 \dots 10^{50}$ |
| $T_{D,2} =$ F       | $1.00468 \times 10^5 \pm 2.56 \times 10^4$ $\mu\text{s}$ | $1 \dots 10^8$        | background =         | $0 \pm 0$ Hz                                 | $0 \dots 10^{50}$ |
| $G_{\infty} =$ FX   | $0 \pm 0$                                                | $-10 \dots 10$        | cnt/molec = C        | $0 \pm 0$ Hz                                 | $0 \dots 10^{50}$ |

*legend: F: fit parameter, X: fixed parameter, C: calculated parameter*

### Fit Result Message:

levmar returned after 3000 iterations.  
reason: stopped by maximum iterations. SES = 67.8881 [old\_SES = 68.8827]

### Fit Statistics:

$$\chi^2 = 10.3734 \quad \chi^2 \text{ (weighted)} = 67.8881$$

## Endoplasmatic Reticulum Fitting data 1

### Model Parameters (fit results):

| Parameter           | Value                                                    | Range                 | Parameter            | Value                                        | Range             |
|---------------------|----------------------------------------------------------|-----------------------|----------------------|----------------------------------------------|-------------------|
| # non-fluorescent = | 0                                                        | 0...2                 | $\gamma =$ FX        | $7 \pm 1.6$                                  | 0.01...100        |
| components =        | 2                                                        | 1...3                 | $w_{x,y} =$          | $295.47 \pm 12$ nm                           | $0 \dots 10^4$    |
| N = F               | $1.5353 \pm 0.0684$                                      | $10^{-10} \dots 10^5$ | $V_{\text{eff}} =$ C | $1.0055 \pm 0.26$ fl                         | $0 \dots 10^{50}$ |
| 1/N = C             | $0.6513 \pm 0.029$                                       | $10^{-10} \dots 10^5$ | $C_{\text{all}} =$ C | $2.5357 \pm 0.666$ nM                        | $0 \dots 10^{50}$ |
| $\rho_1 =$ C        | $0.878 \pm 0.0271$                                       | $0 \dots 0.99999$     | $D_1 =$ C            | $6.1894 \pm 1.68$ $\mu\text{m}^2/\text{s}$   | $0 \dots 10^{50}$ |
| $T_{D,1} =$ F       | $3526.3156 \pm 916$ $\mu\text{s}$                        | $1 \dots 10^5$        | $D_2 =$ C            | $0.0765 \pm 0.0272$ $\mu\text{m}^2/\text{s}$ | $0 \dots 10^{50}$ |
| $\rho_2 =$ F        | $0.122 \pm 0.0271$                                       | $0 \dots 0.99999$     | count rate =         | $0 \pm 0$ Hz                                 | $0 \dots 10^{50}$ |
| $T_{D,2} =$ F       | $2.85177 \times 10^5 \pm 9.85 \times 10^4$ $\mu\text{s}$ | $1 \dots 10^8$        | background =         | $0 \pm 0$ Hz                                 | $0 \dots 10^{50}$ |
| $G_{\infty} =$ FX   | $0 \pm 0$                                                | $-10 \dots 10$        | cnt/molec = C        | $0 \pm 0$ Hz                                 | $0 \dots 10^{50}$ |

*legend: F: fit parameter, X: fixed parameter, C: calculated parameter*

### Fit Result Message:

levmar returned after 3000 iterations.  
reason: stopped by maximum iterations. SES = 40.2952 [old\_SES = 40.2953]

### Fit Statistics:

$$\chi^2 = 7.61478 \quad \chi^2 \text{ (weighted)} = 40.2952$$

## Cytoplasm Fitting data 1

### Model Parameters (fit results):

| Parameter           | Value                             | Range                 | Parameter            | Value                                       | Range             |
|---------------------|-----------------------------------|-----------------------|----------------------|---------------------------------------------|-------------------|
| # non-fluorescent = | 0                                 | 0...2                 | $w_{x,y} =$          | $295.47 \pm 12$ nm                          | $0 \dots 10^4$    |
| components =        | 1                                 | 1...3                 | $V_{\text{eff}} =$ C | $1.0055 \pm 0.26$ fl                        | $0 \dots 10^{50}$ |
| N = F               | $1.7726 \pm 0.118$                | $10^{-10} \dots 10^5$ | $C_{\text{all}} =$ C | $2.9275 \pm 0.783$ nM                       | $0 \dots 10^{50}$ |
| 1/N = C             | $0.5641 \pm 0.0376$               | $10^{-10} \dots 10^5$ | $D_1 =$ C            | $12.2138 \pm 2.98$ $\mu\text{m}^2/\text{s}$ | $0 \dots 10^{50}$ |
| $T_{D,1} =$ F       | $1786.9662 \pm 411$ $\mu\text{s}$ | $1 \dots 10^5$        | count rate =         | $0 \pm 0$ Hz                                | $0 \dots 10^{50}$ |
| $G_{\infty} =$ FX   | $0 \pm 0$                         | $-10 \dots 10$        | background =         | $0 \pm 0$ Hz                                | $0 \dots 10^{50}$ |
| $\gamma =$ FX       | $7 \pm 1.6$                       | 0.01...100            | cnt/molec = C        | $0 \pm 0$ Hz                                | $0 \dots 10^{50}$ |

*legend: F: fit parameter, X: fixed parameter, C: calculated parameter*

### Fit Result Message:

levmar returned after 3000 iterations.  
reason: stopped by maximum iterations. SES = 30.2462 [old\_SES = 30.2462]

### Fit Statistics:

$$\chi^2 = 20.1506 \quad \chi^2 \text{ (weighted)} = 30.2462$$

### S13. Bibliography

1. Maus, L.; Dick, O.; Bading, H.; Spatz, J. P.; Fiammengo, R., Conjugation of peptides to the passivation shell of gold nanoparticles for targeting of cell-surface receptors. *ACS Nano* **2010**, *4* (11), 6617-28.
2. Xia, H.; Bai, S.; Hartmann, J.; Wang, D., Synthesis of Monodisperse Quasi-Spherical Gold Nanoparticles in Water via Silver(I)-Assisted Citrate Reduction. *Langmuir* **2010**, *26* (5), 3585-3589.
3. Levin, C. S.; Bishnoi, S. W.; Grady, N. K.; Halas, N. J., Determining the Conformation of Thiolated Poly(ethylene glycol) on Au Nanoshells by Surface-Enhanced Raman Scattering Spectroscopic Assay. *Analytical chemistry* **2006**, *78* (10), 3277-3281.
4. Duncanson, W. J.; Figa, M. A.; Hallock, K.; Zalipsky, S.; Hamilton, J. A.; Wong, J. Y., Targeted binding of PLA microparticles with lipid-PEG-tethered ligands. *Biomaterials* **2007**, *28* (33), 4991-4999.
5. Jin, J.; Han, Y.; Zhang, C.; Liu, J.; Jiang, W.; Yin, J.; Liang, H., Effect of grafted PEG chain conformation on albumin and lysozyme adsorption: A combined study using QCM-D and DPI. *Colloids and Surfaces B: Biointerfaces* **2015**, *136*, 838-844.
6. Haiss, W.; Thanh, N. T.; Aveyard, J.; Fernig, D. G., Determination of size and concentration of gold nanoparticles from UV-vis spectra. *Analytical chemistry* **2007**, *79* (11), 4215-21.
7. Krieger, J. W.; Langowski, J., QuickFit 3.0 (compiled: 2015-10-29, SVN: 4465): A data evaluation 2010-2017.
